# Supplementary material for: Nodal and planar cell polarity signaling cooperate to regulate zebrafish convergence and extension gastrulation movements
Source: eLife. 2020 Apr 22;9:e54445. doi: 10.7554/eLife.54445 (PMC7250581; doi:10.7554/eLife.54445)
Supplement: Source data 1. — Values shown in columns H through M are counts per million reads mapped (CPM) for each biological replicate. [file elife-54445-data1.xlsx]

## Sheet: wt_90_vs_mzoep_90_DEG_significa
	baseMean	log2FoldChange	lfcSE	stat	pvalue	padj	wt_90_1	wt_90_2	wt_90_3	mzoep_90_1	mzoep_90_2	mzoep_90_3		positive fold change is higher in WT
aadacl4	46.4946	6.1806	1.12056	5.51562	3.47549e-08	7.62594e-07	1.62613	2.37731	1.76877	0	0	0.0837666
abca1a	1271.59	-1.64445	0.363394	-4.52525	6.03236e-06	8.02521e-05	59.526	31.8636	36.5271	158.975	115.416	140.016
abca4a	364.85	-3.94585	0.465001	-8.48569	2.14447e-17	1.77907e-15	5.02621	5.86658	6.12898	74.1246	100.357	98.007
abcb11a	180.988	-1.56155	0.34429	-4.53556	5.74504e-06	7.67756e-05	10.2002	17.4464	16.577	64.1619	34.668	35.4333
abcb6a	6371.53	2.37024	0.201688	11.752	6.89632e-32	1.81854e-29	304.233	289.15	251.699	45.4758	62.1858	62.4061
abcc13	36.6374	2.71282	0.386206	7.02428	2.15167e-12	9.92927e-11	3.30153	2.79909	3.00279	0.476686	0.577801	0.37695
abcc5	356.559	1.08469	0.380872	2.84792	0.00440063	0.022914	16.9511	14.1488	12.258	6.33992	8.37811	6.5338
abcc6a	69.2308	2.09109	0.560468	3.73097	0.000190744	0.00166276	3.89285	4.71627	5.34743	0.905703	1.48061	1.0052
abcg2c	446.807	1.40448	0.244957	5.73357	9.8339e-09	2.40426e-07	15.7685	12.9602	13.8622	4.90986	6.28358	5.48671
abhd14a	167.757	-1.00251	0.242982	-4.12585	3.69366e-05	0.000398425	8.52484	9.12579	7.98001	14.6343	21.0175	17.7166
abo	6.03462	-5.02166	1.14572	-4.38297	1.17071e-05	0.000145276	0.0492765	0.0383437	0.0822681	1.38239	1.91396	2.42923
acadm	638.04	1.01299	0.294355	3.44139	0.000578723	0.0042581	36.5139	25.4985	22.9528	16.541	13.2172	13.9053
acot9.2	29.2704	-1.45819	0.43502	-3.352	0.000802303	0.0056121	0.788424	0.613499	1.15175	2.95545	1.95008	2.34547
acsbg1	15.3344	2.36402	0.604191	3.9127	9.12682e-05	0.000872335	1.77395	3.3359	7.44527	0.953372	0.722251	0.837666
acsl1a	543.323	1.01444	0.305067	3.32529	0.00088325	0.00606649	15.1772	14.3405	14.109	7.81765	6.86138	7.70653
acsm3	134.44	-1.14079	0.430015	-2.6529	0.00798028	0.037	4.63199	4.79296	10.4892	14.0622	14.0117	17.2559
acta1a	46.0857	1.8279	0.571204	3.20008	0.00137389	0.008779	1.77395	1.57209	1.27516	0.66736	0.397238	0.293183
acta2	49.0427	-2.36209	0.49919	-4.73185	2.22484e-06	3.27233e-05	1.42902	2.18559	0.370207	5.95857	6.86138	8.58608
ACTC1_(5_of_6)	484.868	6.87508	0.553679	12.4171	2.11087e-35	6.92694e-33	20.6961	15.3375	29.9456	0.143006	0.108338	0.335067
actc1a	308.042	6.30003	0.822915	7.65575	1.92188e-14	1.15367e-12	5.37114	8.32058	2.09784	0.0953372	0.0361125	0.0837666
actn3b	385.028	-1.20476	0.321688	-3.74512	0.000180309	0.00158679	12.1713	19.6703	9.0495	26.6467	45.3574	26.3027
adam19a	169.193	1.44898	0.346323	4.1839	2.86553e-05	0.000319601	8.22918	10.8896	9.95445	5.0052	3.25013	2.7643
adam8a	397.18	1.00752	0.338219	2.97889	0.00289296	0.0162272	15.6207	10.2378	11.5998	6.10158	7.58363	5.65425
adamts18	2347.88	1.49549	0.199852	7.48303	7.26283e-14	4.01686e-12	117.771	123.505	117.685	35.5608	50.0159	46.7418
adamts3	51.9011	-3.07284	0.350962	-8.75549	2.03227e-18	1.88745e-16	1.72468	1.53375	1.6865	10.9161	18.0563	14.2403
adcy2b	13.7191	-2.65745	0.653611	-4.06579	4.78693e-05	0.000495713	0.295659	0.306749	0.452475	1.62073	2.74455	2.55488
adcy7	63.4072	-1.47066	0.284186	-5.17502	2.27892e-07	4.27067e-06	2.21744	1.8405	2.75598	5.67256	7.00583	6.86886
adgrb3	21.2032	2.24851	0.499286	4.50345	6.68583e-06	8.7916e-05	1.6754	1.26534	2.09784	0.143006	0.397238	0.544483
adgrf7	11.472	-1.87143	0.49664	-3.76818	0.000164445	0.00146375	0.295659	0.460124	0.370207	1.04871	1.33616	1.92663
adgrv1	162.379	2.09446	0.387484	5.40528	6.47057e-08	1.35726e-06	16.4584	15.5292	22.089	4.48085	5.56133	3.05748
admp	9005.45	1.85954	0.426979	4.35511	1.33002e-05	0.000162184	70.2683	57.0937	62.9351	16.4457	15.0589	22.9102
adora1	252.784	1.25549	0.184612	6.80071	1.04108e-11	4.37995e-10	10.9887	16.1043	13.8622	5.72023	6.42803	5.65425
adra2b	15.8884	1.75906	0.692812	2.53901	0.0111165	0.0479088	1.4783	1.26534	1.31629	0.381349	0.361125	0.5026
adss	44.4257	2.37563	0.332565	7.14337	9.10697e-13	4.40927e-11	7.44076	8.93408	5.63537	1.76374	1.51673	1.13085
aebp1	31.089	-1.39325	0.477452	-2.91809	0.00352183	0.0190641	0.985531	1.76381	1.11062	3.38447	4.36962	2.80618
afap1l1b	31.6358	-1.85803	0.446881	-4.15778	3.2136e-05	0.00035178	0.788424	0.42178	0.863816	2.19275	2.49177	3.05748
aff3	83.7203	3.21733	0.636339	5.05601	4.28126e-07	7.44657e-06	1.97106	1.87884	1.9333	0.476686	0.14445	0.0418833
afmid	64.7584	-1.09307	0.330677	-3.30555	0.000947904	0.00641802	3.79429	3.37424	3.12619	8.10366	6.13913	8.50231
aftphb	140.685	-1.98202	0.283362	-6.99466	2.65909e-12	1.20082e-10	3.69574	5.25308	5.75877	17.6374	22.8592	19.8527
aida	119.846	-1.24555	0.230158	-5.4117	6.24304e-08	1.31514e-06	3.25225	3.56596	3.24959	9.1047	7.33085	8.33478
aifm4	88.8859	1.13151	0.29581	3.82512	0.000130709	0.00119284	5.32186	5.1764	4.23681	2.66944	2.05841	2.2617
aipl1	12.1439	2.1827	0.539061	4.04907	5.14211e-05	0.000527683	1.52757	1.18865	1.6865	0.524354	0.361125	0.12565
AKAP13_(1_of_2)	247.191	2.21783	0.316224	7.01349	2.32442e-12	1.06269e-10	6.3074	7.51536	6.49918	1.62073	1.37228	1.54968
akna	251.343	1.57261	0.270274	5.81858	5.93502e-09	1.51893e-07	9.6582	8.58898	8.55589	1.85907	2.63622	4.85846
AL645691.2	37.1479	2.44623	0.439752	5.56274	2.65566e-08	5.95989e-07	1.42902	1.64878	1.48083	0.33368	0.2889	0.2513
aldh1a2	3207.02	7.51089	0.442232	16.9841	1.07775e-64	1.76835e-61	199.176	199.157	191.644	1.04871	1.01115	1.29838
aldh2.2	237.68	1.47176	0.38737	3.79937	0.000145063	0.00131006	15.867	13.8421	9.37857	5.33888	6.03079	3.2669
aldh3a2a	133.301	-1.87453	0.255848	-7.32674	2.35812e-13	1.22614e-11	2.61166	2.99081	2.79712	10.3918	11.4477	10.1358
aldh8a1	10.9941	2.28646	0.653848	3.49692	0.00047066	0.00358815	1.6754	1.227	1.06949	0.286011	0.505576	0.0418833
alg14	112.205	1.01457	0.268781	3.77469	0.000160205	0.00143118	5.51897	5.78989	6.17011	3.62281	2.92512	2.42923
alg9	326.154	1.27648	0.280938	4.54364	5.52899e-06	7.43594e-05	14.1916	19.4786	16.2891	6.57826	7.65586	7.16205
alkbh2	90.117	-1.86455	0.276786	-6.73644	1.62312e-11	6.62117e-10	1.97106	1.38037	2.13897	6.14925	6.24747	8.25101
alkbh7	27.3968	-1.32583	0.349002	-3.79891	0.000145334	0.00131023	1.23191	0.651842	0.740413	2.5741	1.98619	2.17793
alox5b.2	26.3653	4.20703	1.08849	3.86501	0.000111087	0.00103366	1.6754	2.03221	3.33186	0	0.180563	0.209417
alpi.2	27.0229	2.31901	0.653578	3.54818	0.000387905	0.00305178	1.37974	9.62426	7.89774	1.6684	0.938926	1.29838
amacr	21.1485	1.0178	0.362792	2.80546	0.00502448	0.0254796	1.72468	1.95553	2.09784	0.858034	1.01115	1.08897
amdhd2	297.11	1.06226	0.265473	4.00137	6.29759e-05	0.000633923	24.8846	21.3574	24.7627	15.1109	9.89484	10.1358
amotl2a	4689.23	1.03499	0.257791	4.01484	5.94849e-05	0.000602892	281.27	380.829	292.463	128.657	203.097	152.958
ampd2a	43.882	-2.24637	0.50703	-4.43045	9.40365e-06	0.000119634	0.591318	0.268406	0.370207	1.62073	1.91396	2.42923
anapc5	612.389	-1.55893	0.138328	-11.2698	1.84965e-29	4.20212e-27	16.5076	19.6703	18.9217	53.2935	55.2883	59.8931
angel1	116.312	1.03882	0.405764	2.56015	0.0104626	0.0459279	4.58272	4.10277	8.43248	3.52747	2.34732	2.72242
angptl2b	43.0213	-1.94323	0.679892	-2.85815	0.00426121	0.0222587	1.4783	1.38037	1.52196	6.95961	5.38077	5.06788
angptl4	1372.84	-1.44937	0.291933	-4.96474	6.87941e-07	1.1453e-05	21.0904	13.7654	21.7188	64.8769	43.1906	51.3489
angptl5	27.0763	4.67109	0.624032	7.48534	7.13598e-14	3.96154e-12	7.19437	5.63652	5.6765	0.381349	0.252788	0.12565
angptl6	28.3949	-1.81116	0.659612	-2.74579	0.00603651	0.0296459	0.837701	1.76381	1.11062	4.76686	4.65852	4.10457
angptl7	161.832	6.6887	0.539157	12.4059	2.42894e-35	7.79743e-33	7.58859	17.1013	16.4125	0.190674	0.180563	0.0418833
ankdd1b	25.9789	-1.36014	0.419682	-3.2409	0.00119154	0.00779598	1.37974	1.18865	1.02835	2.66944	3.21402	3.68573
ankrd29	11.5536	-4.81858	0.784499	-6.14223	8.13686e-10	2.5085e-08	0.0985531	0	0.164536	2.24042	2.41954	2.84807
ankrd33ba	16.5466	-2.71262	0.599033	-4.52833	5.9451e-06	7.91625e-05	0.591318	0.191718	0.287939	2.4311	2.20287	2.513
ankrd39	30.5237	-2.16747	0.394983	-5.4875	4.07656e-08	8.86577e-07	0.640595	0.42178	0.822681	2.86011	2.27509	3.60197
ankrd6a	361.562	2.09223	0.177367	11.7961	4.09036e-32	1.09822e-29	95.5965	105.177	95.431	25.4074	21.4508	25.13
antxr1c	74.9073	4.00436	0.717219	5.58318	2.36155e-08	5.34863e-07	5.51897	5.75155	6.95166	0.238343	0.43335	0.5026
anxa13l	70.2418	3.53897	0.465612	7.60069	2.94552e-14	1.70574e-12	2.75949	2.56903	3.00279	0.190674	0.216675	0.335067
anxa1a	2940.61	1.33588	0.379883	3.51656	0.000437184	0.00337651	632.563	601.152	579.332	267.468	228.412	247.949
anxa2a	341.906	-1.51888	0.541324	-2.80586	0.00501821	0.0254565	8.67267	6.40339	14.8083	30.5079	33.6569	24.2504
anxa4	131.085	1.95045	0.264409	7.37666	1.62311e-13	8.56015e-12	12.7133	7.78377	9.46084	3.19379	2.70844	2.13605
aoc2	3484.6	1.54857	0.155772	9.94123	2.75394e-23	3.72168e-21	160.099	206.404	153.183	55.2002	67.8916	61.4428
apip	430.692	-2.32195	0.642224	-3.61548	0.000299795	0.0024499	12.0235	8.28223	3.29073	59.9671	26.0371	36.0615
aplnr2	424.253	1.04606	0.381593	2.74131	0.00611943	0.029987	6.15957	7.78377	9.33743	2.95545	4.83908	3.89515
aplnra	8784.06	2.18745	0.22578	9.68843	3.37691e-22	4.22601e-20	137.137	139.073	133.028	28.1721	30.479	34.5956
aplnrb	2217.5	4.94668	0.388786	12.7234	4.38268e-37	1.61797e-34	231.156	247.317	217.147	9.2477	7.94476	6.15685
apoda.2	97.2136	1.57674	0.45273	3.48274	0.000496304	0.00375265	5.56825	3.91105	7.11619	3.05079	2.05841	0.62825
apol1	12.1254	-2.80077	0.81436	-3.43922	0.000583385	0.00428813	0.443489	0.306749	0.329073	2.62177	1.87785	3.2669
APOLD1_(2_of_4)	16.3828	-1.47481	0.466919	-3.15859	0.00158533	0.00987785	1.18264	0.920248	0.987218	2.66944	3.53903	2.68053
APOLD1_(4_of_4)	80.34	-1.88198	0.244271	-7.70449	1.31372e-14	7.95069e-13	3.05514	3.10584	2.71485	9.05703	13.7228	11.1828
aqp10a	28.1131	1.56547	0.499632	3.13324	0.0017289	0.0106198	5.71608	9.50923	5.84104	3.62281	1.76951	1.96852
aqp3a	353.761	2.2826	0.390655	5.84299	5.12712e-09	1.32316e-07	18.3801	16.1427	12.8338	3.90882	3.4668	2.72242
aqp9b	22.3826	8.36303	1.30168	6.42478	1.32057e-10	4.71036e-09	1.57685	2.7224	3.00279	0	0	0
ar	51.235	-2.2037	0.426137	-5.17134	2.32419e-07	4.34446e-06	1.92178	1.38037	2.18011	6.91194	8.70312	10.5546
arhgap21a	122.188	-1.28638	0.349796	-3.67753	0.000235507	0.00199183	6.70161	6.9402	6.82826	15.3493	17.5868	18.8894
arhgap29a	196.43	-1.22937	0.34905	-3.52205	0.000428223	0.00331866	10.9394	11.6948	15.2607	32.3193	35.1375	24.4599
arhgap4b	195.336	-1.79737	0.35319	-5.08897	3.60014e-07	6.38981e-06	6.01174	4.75462	3.90774	13.4425	20.3314	19.3082
arhgef10	265.28	1.45345	0.290223	5.00806	5.49811e-07	9.32154e-06	5.61752	6.17333	6.08784	1.90674	2.67233	2.17793
arhgef10la	52.4307	-1.17147	0.455197	-2.57355	0.0100661	0.0445447	3.1537	3.71934	4.52475	5.62489	11.9171	9.17245
arhgef3	69.1353	1.24515	0.333663	3.73177	0.00019014	0.00165847	3.59719	2.56903	3.66093	0.953372	1.80563	1.5078
arhgef4	64.0915	1.18492	0.269334	4.39943	1.08537e-05	0.000136058	7.44076	5.86658	5.75877	2.5741	3.1779	2.93183
arl13a	105.191	1.34638	0.404396	3.32937	0.00087043	0.00599237	3.49863	2.26228	2.83825	1.57306	0.975039	0.963316
arl4d	1411.91	1.22854	0.173484	7.08155	1.42548e-12	6.76852e-11	102.84	90.3377	103.452	55.7722	38.6404	36.3547
arl8bb	158.167	1.06005	0.345292	3.07	0.00214059	0.0127306	6.70161	5.13805	4.36021	3.09846	2.78067	2.17793
arr3b	84.5917	-1.11835	0.336935	-3.3192	0.000902759	0.00616607	3.64646	3.87271	3.90774	9.96273	8.08921	7.62276
asb16	22.7855	-1.57811	0.614322	-2.56887	0.0102032	0.0450704	0.492765	1.26534	0.329073	2.24042	2.56399	1.71722
astn1	97.5364	1.61949	0.414128	3.91061	9.20634e-05	0.000877663	3.40008	3.98774	4.36021	1.43006	1.1556	1.38215
atcaya	53.3491	-1.34324	0.355785	-3.77542	0.000159738	0.00142787	2.11889	1.41872	1.72763	5.0052	5.05576	3.72762
atf5a	60.7772	1.65459	0.411433	4.02153	5.78214e-05	0.000587645	1.77395	2.56903	2.01557	0.762697	0.43335	0.921433
atg16l2	98.0178	1.62017	0.343482	4.71689	2.39472e-06	3.48059e-05	6.84944	9.24083	11.6409	3.76582	2.92512	2.63865
atoh8	58.3555	1.22467	0.478911	2.5572	0.010552	0.0462276	7.83497	5.71321	6.58145	3.76582	2.13064	3.0156
atp10b	17.8104	-3.02895	0.61895	-4.89368	9.89654e-07	1.59196e-05	0.394212	0.460124	0.452475	3.81349	3.61125	3.64385
atp1a1b	477.816	2.17948	0.353673	6.16244	7.16339e-10	2.25514e-08	15.1772	8.97242	12.258	3.05079	3.43069	1.84287
atp2a2a	380.469	1.49824	0.264527	5.66385	1.48011e-08	3.50568e-07	26.1658	34.2409	25.5443	9.05703	11.7005	10.8478
atp5g1	1192.55	1.14724	0.390355	2.93896	0.0032932	0.0180448	52.8737	26.9173	48.4148	31.1276	15.4201	12.9838
atp6v0cb	178.464	1.29273	0.232088	5.56998	2.54767e-08	5.74373e-07	27.7427	24.6166	24.3514	14.1576	9.53371	8.71173
atp6v0d1	583.487	1.44525	0.143677	10.059	8.38431e-24	1.17915e-21	31.7834	36.3498	38.8306	12.9182	13.6867	14.1147
atp6v1f	433.661	1.06294	0.296896	3.58016	0.000343378	0.00274238	23.4556	16.6795	23.9812	13.9192	7.83642	9.92635
atrnl1a	20.1068	-2.59874	0.549953	-4.72539	2.29678e-06	3.35807e-05	0.739148	0.115031	0.493609	3.09846	2.41954	2.7643
atxn2	122.754	1.13633	0.357806	3.17582	0.00149416	0.00937309	16.9018	20.4755	18.5103	10.4871	9.53371	6.2825
atxn7l1	31.8913	-1.12176	0.345476	-3.247	0.00116629	0.00766127	1.28119	1.72547	1.43969	2.47877	4.15294	3.43443
avpr2l	23.7793	1.3244	0.486516	2.72221	0.00648465	0.031386	3.3508	3.06749	2.13897	0.762697	0.866701	1.92663
b2m	48.2548	-4.02231	0.475181	-8.4648	2.56601e-17	2.10513e-15	0.886977	0.651842	0.740413	17.542	11.3032	9.21433
b3galt2	342.632	1.85952	0.366031	5.08023	3.76978e-07	6.6589e-06	20.3512	22.0476	18.5515	5.10054	6.10302	6.24061
B3GNT3_(4_of_4)	92.9016	-1.43901	0.294816	-4.88104	1.05529e-06	1.68834e-05	2.95659	4.71627	3.08506	10.5348	10.3282	9.46563
b3gnt5b	1621.22	1.25932	0.247311	5.09207	3.54176e-07	6.30895e-06	15.7192	13.6887	17.2352	7.67464	4.80297	7.70653
b3gnt7l	290.682	1.99612	0.493643	4.04366	5.26238e-05	0.000537782	2.56238	2.95246	3.08506	0.953372	0.577801	0.712016
baiap2l2b	62.241	1.76433	0.432002	4.08408	4.42514e-05	0.000464105	1.77395	3.06749	3.04392	0.429017	1.08338	0.87955
barhl2	48.4562	-2.31479	0.673149	-3.43875	0.000584397	0.00429118	1.08408	1.91718	1.85103	9.8674	7.33085	7.74841
BBOF1_(2_of_2)	64.2635	3.87352	0.641229	6.04078	1.53373e-09	4.3978e-08	1.08408	1.34203	1.72763	0.238343	0	0.0837666
bcas3	442.39	1.01401	0.347714	2.91623	0.00354291	0.0191501	25.5252	21.2807	13.204	6.38759	13.4339	11.2247
bcl2l11	49.3944	-1.02476	0.310983	-3.29523	0.000983421	0.0066281	0.689871	0.996935	1.60423	2.47877	2.41954	2.09417
BCL2L14	219.24	1.05484	0.392274	2.68905	0.00716566	0.0340123	23.16	14.6473	17.1118	9.81973	7.15028	10.4289
bco1	88.9639	1.98211	0.512561	3.86706	0.000110154	0.00102694	7.39148	5.13805	10.4892	2.90778	1.04726	2.05228
bco2l	75.8745	1.38028	0.395037	3.49406	0.000475738	0.00362125	12.6641	14.2255	11.7232	6.72127	5.27243	3.35067
bdh1	61.9478	-1.24046	0.460615	-2.69305	0.00708012	0.0336613	2.26672	1.68712	2.46804	5.57722	3.86404	6.24061
BDP1_(2_of_2)	72.607	1.12793	0.279058	4.04191	5.30166e-05	0.000541422	5.96246	6.86352	5.71764	2.38343	3.68348	2.72242
bhlha15	269.317	6.885	0.643396	10.701	1.00646e-26	1.81248e-24	11.1365	13.727	12.7516	0.0476686	0.0722251	0.209417
bhlhe41	133.646	1.27703	0.419641	3.04315	0.00234117	0.0136962	26.5108	31.7102	32.4136	15.4446	12.8922	10.3033
bicc2	195.305	5.08327	0.633491	8.02422	1.0217e-15	7.08329e-14	4.13923	2.83743	3.8666	0.190674	0.14445	0
bin1a	40.3312	-1.69655	0.321311	-5.28008	1.29129e-07	2.53233e-06	0.985531	1.87884	2.18011	5.29121	4.73074	7.0364
bmi1a	291.034	1.8099	0.221921	8.15558	3.47496e-16	2.54033e-14	17.8874	29.3713	21.5543	6.62593	7.07806	6.65945
bmp7a	3023.43	-1.17043	0.283582	-4.12731	3.67036e-05	0.000396201	99.5386	108.781	75.2342	220.134	209.344	233.081
bmpr1ba	294.239	-1.08046	0.328029	-3.29379	0.000988466	0.00665603	14.5366	18.4433	18.1813	41.2333	29.215	41.3807
bmpr1bb	174.661	-1.14784	0.212214	-5.40887	6.34252e-08	1.33377e-06	9.0176	6.51842	9.13176	18.8291	18.7424	18.9731
bnip4	969.895	-1.50269	0.346734	-4.33384	1.4653e-05	0.000176781	7.93352	13.8421	5.3063	29.7452	23.5815	26.3446
brat1	92.9236	-1.27858	0.251477	-5.08427	3.69044e-07	6.53439e-06	3.49863	4.63958	4.11341	9.29537	11.0866	10.5127
brinp3a	14.3218	2.29197	0.66272	3.45843	0.000543337	0.00403595	1.28119	2.56903	1.15175	0.33368	0.43335	0.293183
btbd11a	114.385	2.13638	0.415153	5.146	2.661e-07	4.89352e-06	6.20884	3.64265	4.85382	0.572023	1.33616	1.54968
btbd17b	17.7965	-1.21178	0.454025	-2.66898	0.00760816	0.0355988	0.640595	1.53375	1.15175	1.85907	3.97238	2.21982
btr07	21.3805	-1.02959	0.40164	-2.56347	0.0103633	0.0456139	0.689871	1.03528	1.85103	2.04975	2.81678	2.72242
btr23	19.0405	-2.17468	0.398474	-5.45752	4.82834e-08	1.0339e-06	0.542042	0.575155	0.617011	2.47877	3.21402	2.42923
btr26	72.1092	1.8533	0.513525	3.60898	0.000307399	0.00250517	1.82323	3.48927	2.46804	0.715029	0.686138	0.837666
BX000701.2	63.8658	2.00603	0.338927	5.91876	3.24379e-09	8.74108e-08	8.47556	10.3528	11.5175	2.47877	2.41954	2.93183
BX004876.1	128.246	1.93805	0.416405	4.65424	3.25176e-06	4.60799e-05	13.6496	14.2638	29.2875	3.24146	5.59744	6.61756
BX088712.2	43.8127	2.64388	0.583425	4.53164	5.85269e-06	7.80728e-05	1.33047	1.15031	3.70207	0.429017	0.14445	0.460717
BX321873.1	64.4552	-1.74028	0.356214	-4.8855	1.03166e-06	1.65234e-05	1.92178	1.87884	1.8099	6.86428	8.45033	4.10457
BX321887.3	8.7896	-1.91511	0.573809	-3.33754	0.00084523	0.00584888	0.295659	0.498468	0.20567	1.23938	1.69729	1.0052
BX322587.1	21.5943	4.83211	0.825271	5.85518	4.76496e-09	1.24546e-07	1.52757	1.4954	1.52196	0.0476686	0.0361125	0.0837666
BX323023.1	32.1695	1.4353	0.56318	2.54857	0.0108167	0.0470625	1.52757	2.22393	0.699279	0.381349	0.252788	1.08897
BX324155.1	197.871	1.1884	0.216471	5.48987	4.02238e-08	8.76083e-07	4.87838	5.90493	8.02114	1.95441	3.93627	2.59677
BX324179.2	116.706	1.52996	0.318045	4.81051	1.50548e-06	2.31578e-05	5.17404	5.48315	6.54032	1.71607	3.25013	1.17273
BX324216.4	52.4201	-3.14211	0.590035	-5.3253	1.00788e-07	2.03603e-06	1.37974	0.881904	1.23402	7.29329	13.2172	11.5598
BX511078.3	24.8951	1.92526	0.488306	3.94273	8.05586e-05	0.00078442	1.28119	1.07362	1.23402	0.238343	0.43335	0.293183
BX537137.2	50.9708	2.03657	0.34793	5.85339	4.81642e-09	1.25661e-07	3.10442	2.49234	1.39856	0.476686	0.686138	0.586366
BX547934.1	32.6398	-2.16085	0.405247	-5.33217	9.70441e-08	1.96578e-06	0.394212	0.805217	0.699279	2.04975	3.43069	3.43443
BX548173.1	49.9609	2.01095	0.407773	4.93154	8.15831e-07	1.3312e-05	1.42902	2.41565	2.50918	0.619692	0.2889	0.7539
BX548173.2	74.8466	1.71241	0.503409	3.40164	0.00066984	0.00482985	2.90732	2.76074	3.45526	1.09638	0.252788	1.54968
BX571711.1	130.452	3.72367	0.306897	12.1333	7.03621e-34	2.16466e-31	6.60305	10.4678	8.72042	0.619692	0.577801	0.837666
BX571760.1	83.06	3.33776	0.459775	7.25954	3.88409e-13	1.96426e-11	3.64646	5.36811	7.40413	0.619692	0.361125	0.712016
BX572103.3	64.6562	-5.19513	0.490808	-10.5848	3.50364e-26	5.81329e-24	0.295659	0.230062	0.20567	8.96169	11.4477	7.12016
BX640584.2	29.5591	3.51576	0.574769	6.11683	9.54548e-10	2.88357e-08	1.87251	2.56903	1.85103	0.143006	0.252788	0.167533
BX649453.2	70.8868	4.94559	0.708199	6.98333	2.88258e-12	1.28601e-10	3.74502	3.68099	4.07227	0.286011	0.0361125	0.0837666
BX649497.1	16.1604	-1.55572	0.516701	-3.01087	0.00260501	0.0149333	0.394212	0.72853	0.617011	1.43006	2.52788	1.38215
BX855613.2	40.6181	3.69352	0.513023	7.19952	6.04261e-13	3.00442e-11	1.6754	2.22393	2.75598	0.0953372	0.180563	0.2513
BX901907.2	205.411	3.25018	0.257801	12.6073	1.92372e-36	6.76369e-34	9.26399	10.9663	8.96723	1.33472	0.650026	1.2565
BX901974.2	28.1525	8.33348	1.27219	6.55049	5.73504e-11	2.15495e-09	1.97106	3.14418	2.01557	0	0	0
BX927282.1	85.0483	4.20711	0.813057	5.17443	2.28608e-07	4.27864e-06	1.87251	1.61043	1.56309	0	0.108338	0.167533
BX936303.1	31.7239	4.27514	0.703831	6.0741	1.24685e-09	3.64597e-08	1.18264	1.99387	1.48083	0.143006	0.0361125	0.0837666
BX936303.3	24.6737	-2.06013	0.506078	-4.07077	4.68582e-05	0.000487636	0.985531	0.460124	0.575877	2.14509	3.68348	2.84807
C10H21orf91	31.5316	-2.91804	0.54927	-5.31259	1.08079e-07	2.16554e-06	0.542042	1.15031	0.617011	5.29121	7.72808	5.23541
C10H5orf42	283.699	-1.19156	0.26147	-4.55716	5.18491e-06	7.01149e-05	8.91905	12.4617	8.47362	19.9731	27.5178	23.4547
C13H20orf194	121.558	1.00762	0.279788	3.60137	0.00031654	0.00257115	5.37114	5.02302	5.18289	2.5741	3.14179	2.30358
C13H2orf50	342.762	1.65804	0.415134	3.994	6.4969e-05	0.000651891	4.97693	8.66567	10.6537	3.05079	2.6001	2.30358
C13H9orf72	177.919	1.09871	0.21015	5.22821	1.7116e-07	3.26975e-06	6.70161	8.7807	9.66651	4.19484	4.58629	3.39255
C14H4orf47	20.3259	-1.19948	0.416154	-2.8823	0.0039479	0.0210009	0.492765	0.575155	0.987218	1.33472	1.76951	1.80098
C17H15orf57	688.767	1.36936	0.243995	5.61221	1.99753e-08	4.59464e-07	30.65	18.9418	26.1201	12.2032	8.95591	9.17245
C18H15orf39	216.669	2.48327	0.296638	8.37136	5.69551e-17	4.52181e-15	22.4701	34.1642	26.696	5.43422	5.77801	4.23022
C1H3orf70_(2_of_2)	12.9826	4.58421	0.885737	5.17559	2.2719e-07	4.26834e-06	2.21744	1.30368	2.96165	0.0476686	0.180563	0.0418833
C25H12orf4	84.5072	-1.04306	0.279253	-3.73519	0.000187572	0.00163898	4.23778	3.52762	4.36021	8.00832	9.7865	8.08348
C25H12orf73	64.482	-1.0455	0.387053	-2.70119	0.00690918	0.0329654	1.92178	1.07362	1.11062	3.28913	2.63622	2.80618
C25HXorf38_(1_of_2)	291.906	1.38941	0.366807	3.78786	0.000151951	0.00136488	16.4091	15.951	12.5459	7.34096	7.65586	2.7643
C2H14orf119	235.833	-1.19938	0.370575	-3.23653	0.00120991	0.00788468	5.17404	2.18559	4.77155	14.6343	6.64471	7.32958
c3a.2	12.0625	-2.44212	0.921668	-2.64967	0.00805701	0.0372738	0.246383	0.268406	0.329073	1.14405	1.95008	1.67533
c3b.1	39.7946	3.25019	0.59511	5.46149	4.72156e-08	1.01637e-06	3.05514	2.56903	3.41413	0.190674	0.2889	0.5026
c3b.2	24.2339	3.20323	0.804373	3.98226	6.82617e-05	0.000680635	1.87251	1.34203	1.56309	0.143006	0.14445	0.2513
C5H4orf22	13.1714	-6.07282	1.14134	-5.32078	1.03324e-07	2.0759e-06	0	0	0.123402	2.19275	2.49177	4.10457
c6	15.544	-2.76817	0.598998	-4.62134	3.81274e-06	5.35197e-05	0.542042	0.460124	0.370207	1.57306	3.53903	4.60717
C6H1orf74	18.1253	-1.73952	0.546768	-3.18146	0.00146534	0.00922758	0.443489	0.306749	0.493609	2.14509	1.04726	1.08897
C7H20orf27_(1_of_2)	1878.16	1.3301	0.130657	10.1801	2.43365e-24	3.55819e-22	138.911	178.566	163.837	64.7816	68.7583	64.8773
C8H9orf3	34.2419	-1.1514	0.355297	-3.24068	0.00119245	0.00779842	1.18264	1.07362	1.11062	2.38343	2.63622	2.72242
ca2	26.8416	-2.94379	0.513051	-5.73782	9.59043e-09	2.34862e-07	0.886977	0.690186	1.06949	6.24458	8.77535	6.07308
CABZ01001464.1	63.0517	1.06924	0.399149	2.6788	0.00738875	0.0347815	3.64646	2.7224	1.89217	1.14405	0.938926	2.0104
CABZ01002345.1	16.2147	-2.07336	0.60626	-3.41992	0.000626396	0.00456114	0.591318	0.345093	0.123402	1.62073	1.48061	1.46592
CABZ01009451.1	18.4488	-2.74234	0.462009	-5.93568	2.92625e-09	7.96092e-08	0.394212	0.306749	0.20567	2.33576	2.16675	1.71722
CABZ01011067.1	8.91948	2.0288	0.585499	3.46508	0.000530072	0.00396132	1.62613	2.37731	2.30351	0.66736	0.722251	0.209417
CABZ01021426.1	307.578	1.6537	0.205305	8.05485	7.95766e-16	5.54296e-14	9.21471	14.2638	16.3302	3.76582	4.08072	5.2773
CABZ01023255.1	16.1085	-1.36297	0.412517	-3.30404	0.000953022	0.00644381	0.591318	0.690186	0.740413	1.38239	2.41954	1.59157
CABZ01031753.1	117.04	7.10953	1.13348	6.27228	3.55804e-10	1.19142e-08	1.42902	3.98774	5.63537	0	0	0.0837666
CABZ01032351.1	26.0482	7.44638	1.37886	5.40038	6.64997e-08	1.38897e-06	2.66093	2.83743	2.01557	0	0	0.0418833
CABZ01032351.2	81.7295	10.2936	1.34969	7.6266	2.4102e-14	1.41799e-12	10.151	9.3942	8.22681	0	0	0
CABZ01034698.4	28.4268	-6.31082	0.805283	-7.83678	4.62257e-15	3.00711e-13	0.0492765	0.153375	0	3.95649	5.99468	7.41335
CABZ01041002.1	24.7669	1.78412	0.373103	4.78183	1.73703e-06	2.63084e-05	2.36527	1.87884	1.76877	0.572023	0.722251	0.5026
CABZ01051641.1	36.3485	-4.22779	0.524043	-8.06765	7.16646e-16	5.01551e-14	0.0492765	0.115031	0.246804	3.05079	2.20287	2.97372
CABZ01051641.2	50.0329	-1.63239	0.40858	-3.99528	6.46174e-05	0.000649119	1.03481	0.72853	0.411341	2.19275	2.0223	2.72242
CABZ01054392.2	27.9109	-2.12512	0.381033	-5.57725	2.44352e-08	5.51736e-07	0.640595	0.805217	0.452475	2.52643	3.32235	2.7643
CABZ01055347.1	470.628	-1.0309	0.201476	-5.11671	3.10904e-07	5.63328e-06	23.4556	22.316	22.089	40.1846	59.4051	44.522
CABZ01059627.2	73.4777	1.04679	0.29926	3.49793	0.000468877	0.0035764	2.66093	5.48315	3.00279	1.90674	2.20287	1.5078
CABZ01064972.2	21.5779	-1.29307	0.42979	-3.00861	0.00262445	0.0150272	0.788424	0.843561	1.15175	2.52643	2.20287	2.34547
CABZ01066439.1	17.9772	-1.26104	0.422665	-2.98354	0.00284936	0.016023	0.542042	0.460124	0.658145	1.28705	1.4445	1.38215
CABZ01067245.1	147.177	-1.05077	0.186617	-5.63062	1.79566e-08	4.16926e-07	7.09582	6.6718	6.95166	12.2032	15.6006	16.7114
CABZ01068208.1	94.2107	1.40123	0.290484	4.82377	1.4087e-06	2.18971e-05	17.5424	16.7178	23.7344	7.62697	8.55867	6.5338
CABZ01068209.1	17.0103	1.23063	0.350749	3.50858	0.000450506	0.00347033	2.56238	2.76074	3.53753	1.57306	1.30005	1.04708
CABZ01072043.1	81.5601	4.62198	0.362313	12.7569	2.85361e-37	1.10893e-34	20.3512	18.2132	12.9161	0.286011	0.975039	0.87955
CABZ01077218.1	83.7422	-1.14698	0.296103	-3.8736	0.00010724	0.00100547	1.42902	2.26228	4.31908	6.05391	5.48911	6.86886
CABZ01079258.1	20.2035	-2.95684	0.576431	-5.12956	2.90418e-07	5.29456e-06	0.689871	0.575155	0.699279	3.24146	7.51141	5.10976
CABZ01080370.1	1583.83	-1.03181	0.212807	-4.84859	1.24342e-06	1.95336e-05	45.6793	45.744	38.0079	66.45	100.285	108.897
CABZ01112732.1	16.6185	-1.16429	0.440348	-2.64402	0.00819279	0.037819	0.492765	1.03528	0.658145	1.19171	2.09453	1.84287
CABZ01115396.1	377.177	2.01805	0.419414	4.81161	1.49722e-06	2.30547e-05	24.0962	29.0645	24.228	4.90986	7.29473	7.66465
CABZ01117575.1	271.743	6.19897	0.567634	10.9207	9.17666e-28	1.85633e-25	98.4052	36.5799	104.439	1.47773	0.43335	1.46592
cacna2d3	38.9112	1.80487	0.481238	3.75048	0.000176499	0.00155789	7.09582	4.14112	5.96444	2.28809	1.01115	1.80098
cacnb2b	26.6246	3.90244	0.526478	7.41235	1.2408e-13	6.66285e-12	3.00587	3.60431	2.75598	0.0476686	0.252788	0.335067
cadm3	54.1678	2.70571	0.505966	5.34762	8.91189e-08	1.82274e-06	2.02034	1.61043	4.36021	0.143006	0.758363	0.335067
camk2b2	17.8595	1.3189	0.460428	2.86451	0.00417652	0.0219483	1.77395	1.99387	1.27516	0.762697	0.469463	0.87955
camkk1a	237.926	-1.61315	0.405871	-3.97454	7.05141e-05	0.000699786	5.22331	4.71627	6.62259	18.0187	17.009	17.3816
capn2a	270.287	1.7831	0.286834	6.21648	5.08418e-10	1.64496e-08	11.7278	10.7746	11.3119	3.71815	3.57514	2.88995
capn2b	514.15	-1.20044	0.386621	-3.10496	0.00190305	0.0115126	16.6062	10.5445	10.0367	30.5079	30.3706	27.8524
capn2l	726.082	1.43545	0.318263	4.51027	6.47448e-06	8.54412e-05	31.8326	24.1949	22.2947	9.81973	11.5921	8.66985
capn7	348.795	1.84183	0.185149	9.94785	2.57686e-23	3.52338e-21	9.85531	9.08745	9.87218	2.04975	3.28624	2.93183
capns1a	1261.85	-1.02031	0.246096	-4.14598	3.38362e-05	0.000368752	56.2245	44.5937	48.3325	131.47	73.7057	107.179
card9	17.8821	-2.23066	0.493408	-4.52092	6.15716e-06	8.16917e-05	0.394212	0.805217	0.699279	2.62177	3.14179	3.56008
cart4	100.035	2.64645	0.422067	6.27021	3.60561e-10	1.20462e-08	28.6297	16.066	38.337	4.71919	5.34466	3.64385
caskb	101.979	-1.4856	0.237858	-6.24575	4.21766e-10	1.3996e-08	3.79429	5.02302	5.88217	12.3938	15.2034	15.1618
casp8l1	18.8854	-2.39989	0.563372	-4.25986	2.04552e-05	0.000238407	0.246383	0.958592	0.452475	2.19275	3.97238	3.05748
cat	430.576	1.68894	0.305011	5.53732	3.07141e-08	6.79993e-07	18.528	24.77	26.1201	5.95857	8.16143	8.20913
cav1	150.197	2.43524	0.461688	5.27465	1.33009e-07	2.60151e-06	6.80016	3.60431	6.95166	1.23938	1.11949	0.963316
cax2	8.10724	-1.76745	0.603427	-2.92903	0.00340025	0.0184873	0.295659	0.72853	0.370207	1.81141	1.98619	1.17273
cbln12	14.6988	-3.11866	0.666142	-4.68167	2.84545e-06	4.07963e-05	0.246383	0.115031	0.123402	1.81141	1.1556	1.29838
cbln13	8.84661	-1.59656	0.619234	-2.57828	0.00992921	0.044005	0.492765	0.42178	0.617011	2.00208	1.19171	1.59157
ccdc102a	372.92	1.09246	0.193306	5.65145	1.59095e-08	3.75298e-07	21.9773	24.0031	22.0067	9.8674	12.2783	10.9315
ccdc127b	27.702	-2.28942	0.531799	-4.30504	1.66953e-05	0.000199144	0.394212	0.345093	0.452475	2.47877	1.95008	1.59157
ccdc151	106.385	2.37373	0.480394	4.94122	7.76334e-07	1.27097e-05	1.23191	1.38037	1.52196	0.238343	0.216675	0.37695
CCDC171_(1_of_2)	180.777	1.88183	0.288657	6.51928	7.06446e-11	2.61456e-09	7.19437	10.4295	16.4125	2.86011	4.40573	2.2617
CCDC171_(2_of_2)	109.882	-1.35347	0.436574	-3.10021	0.00193382	0.0116712	5.91318	5.90493	1.97444	10.3441	11.9171	14.4916
ccdc172	46.945	2.52395	0.606027	4.16475	3.11697e-05	0.000343751	4.13923	1.53375	2.96165	0.286011	0.758363	0.5026
ccdc187	731.562	-1.38409	0.148329	-9.33119	1.0469e-20	1.13674e-18	16.8526	15.6826	15.4664	45.5235	41.3127	42.9304
ccdc90b	273.428	2.31276	0.298433	7.74968	9.21272e-15	5.71614e-13	10.0031	7.2853	10.6537	1.28705	2.74455	1.7591
ccdc92	92.2139	1.5871	0.363898	4.36138	1.29246e-05	0.000158256	2.11889	2.41565	1.89217	1.09638	0.686138	0.460717
ccr6a	50.8854	1.43136	0.310006	4.61718	3.88983e-06	5.44982e-05	4.33633	2.7224	5.18289	1.28705	1.51673	1.88475
cd44a	1297.94	2.12756	0.343733	6.18956	6.0332e-10	1.91596e-08	41.1459	34.3943	44.3425	10.7254	12.8561	4.81658
cd63	2036.18	1.21622	0.298964	4.06811	4.73965e-05	0.000491505	26.6093	20.0921	31.0562	15.0633	8.23366	11.2247
cdh11	519.852	2.53176	0.725856	3.48796	0.000486717	0.0036915	13.7974	14.6856	20.4848	3.19379	1.7334	3.81138
cdh13	77.7989	3.89497	0.723857	5.38086	7.41311e-08	1.54182e-06	5.32186	2.60737	8.84383	0.286011	0.252788	0.62825
cdh26.1	240.21	-1.18295	0.19692	-6.00726	1.88686e-09	5.25722e-08	8.91905	7.51536	6.62259	15.3016	19.6452	19.3501
cdh4	171.112	1.88453	0.422101	4.46465	8.01983e-06	0.000103885	12.1713	15.2224	6.33465	2.81245	2.889	3.81138
cdhr1a	21.2513	2.67934	0.746842	3.58756	0.000333783	0.00267954	3.64646	8.01383	4.23681	0.715029	1.7334	0.12565
cdk4	256.757	-1.1436	0.135677	-8.42888	3.49004e-17	2.83172e-15	12.6148	10.8129	11.5998	23.4053	26.4344	30.3235
cenpo	86.2984	1.2573	0.397094	3.16626	0.00154415	0.00965797	2.02034	2.07056	4.93609	1.43006	0.975039	1.5078
cep68	50.569	2.72857	0.455446	5.99098	2.08579e-09	5.77876e-08	2.85804	3.98774	3.7432	0.33368	0.722251	0.586366
cep76	214.231	-1.00131	0.169806	-5.89682	3.70567e-09	9.91333e-08	10.5452	10.6595	12.9984	20.4975	25.4232	25.0881
cers4a	56.415	1.50384	0.402787	3.7336	0.000188762	0.00164743	1.13336	1.38037	1.27516	0.33368	0.577801	0.460717
ces2	34.4797	-1.23237	0.4429	-2.7825	0.00539426	0.026975	1.97106	4.10277	4.11341	10.5824	7.4753	6.65945
CES3_(3_of_4)	212.753	-1.94712	0.499554	-3.89772	9.71022e-05	0.000920352	8.42629	9.01076	4.52475	31.7473	42.2517	14.1147
CES3_(4_of_4)	133.538	-1.97969	0.480809	-4.11742	3.83142e-05	0.000410584	5.27259	4.94633	3.33186	18.9244	26.6872	9.96823
cfap43	50.2312	-1.2395	0.330794	-3.74704	0.000178932	0.00157654	1.28119	1.4954	1.15175	2.24042	3.21402	4.18833
cfap52	62.9177	4.58695	0.713083	6.43256	1.25473e-10	4.51696e-09	1.57685	1.72547	1.48083	0.0953372	0.0722251	0.0418833
cfap53	88.0058	-1.39466	0.350515	-3.97889	6.92375e-05	0.000688969	1.77395	1.76381	2.75598	4.00416	6.42803	6.74321
CFAP70	131.583	-1.35346	0.304631	-4.44293	8.87401e-06	0.000113654	2.75949	3.41259	4.89495	8.199	12.6033	8.5442
CFAP99	95.6076	1.75276	0.382676	4.58027	4.64367e-06	6.36113e-05	1.62613	2.79909	2.50918	0.762697	0.830588	0.544483
cfl1l	2695.47	1.03017	0.306655	3.35939	0.000781133	0.00548502	149.702	78.1061	118.631	81.4656	46.2241	47.2863
cftr	157.922	3.88378	0.461077	8.42328	3.66103e-17	2.95423e-15	3.84357	2.83743	2.18011	0.238343	0.180563	0.209417
chac1	4215.52	1.59691	0.21369	7.47299	7.83911e-14	4.31941e-12	74.6047	127.608	92.7573	37.3722	29.4317	34.093
chchd10	251.63	1.14124	0.406369	2.8084	0.00497887	0.0252917	17.7888	7.66873	11.3941	7.67464	5.12798	4.48152
chchd3b	70.638	-1.16284	0.328316	-3.54183	0.000397368	0.00310637	0.886977	1.68712	2.67371	3.86115	3.10568	5.2773
chd	15143.3	2.17852	0.327225	6.65756	2.78416e-11	1.09003e-09	425.897	554.219	434.787	108.16	131.414	84.73
chga	14.7665	1.54086	0.601227	2.56287	0.0103812	0.0456653	1.23191	1.18865	1.06949	0.476686	0.43335	0.335067
chpfa	1123.56	1.59604	0.343398	4.64778	3.35525e-06	4.74134e-05	28.6297	26.4955	28.0946	8.72335	10.7976	9.0468
CHRM4	10.3422	-1.70225	0.491166	-3.46573	0.000528786	0.00395571	0.640595	0.383437	0.493609	1.62073	1.98619	1.46592
chrna5	149.279	1.79437	0.53761	3.33768	0.00084481	0.00584872	7.1451	8.58898	10.119	3.43214	2.96123	1.29838
chst3a	264.673	1.95807	0.36484	5.36691	8.00966e-08	1.65656e-06	15.0293	19.632	22.9528	5.81557	5.48911	4.0208
CHST5	614.54	2.00363	0.374624	5.34837	8.87486e-08	1.81768e-06	87.4166	41.0277	69.023	15.683	17.4062	18.0517
chsy3	93.4238	1.24556	0.372341	3.34522	0.000822179	0.00571346	3.9914	4.94633	5.14176	2.4311	2.13064	1.59157
ckba	220.025	1.87638	0.215175	8.72027	2.77533e-18	2.49898e-16	12.8612	8.12886	10.119	3.52747	2.63622	2.63865
ckbb	2543.57	1.64697	0.322723	5.10334	3.33711e-07	6.00964e-06	131.667	101.457	109.046	55.3432	29.3234	27.9362
cldn2	21.295	-1.29779	0.482862	-2.6877	0.00719457	0.0341032	1.18264	2.18559	1.23402	3.71815	4.0446	4.0208
cldn5b	63.3832	2.48863	0.488086	5.09876	3.41895e-07	6.12713e-06	2.41455	1.99387	2.67371	0.572023	0.2889	0.460717
cldnb	4431.68	1.45922	0.258306	5.64917	1.61224e-08	3.79712e-07	106.388	100.269	138.416	48.2883	38.2793	43.0561
cldni	32.9384	-2.61998	0.537815	-4.87154	1.10734e-06	1.76208e-05	0.542042	0.958592	0.90495	9.34304	3.71959	2.17793
clec19a	6.80568	-2.47457	0.703531	-3.51736	0.000435863	0.00336853	0.0985531	0.268406	0.246804	1.04871	1.37228	1.17273
clic1	90.2437	1.11164	0.282434	3.93593	8.28756e-05	0.000801981	2.61166	2.7224	2.63258	0.905703	1.62506	1.2565
clic2	172.058	2.03565	0.50461	4.03411	5.48097e-05	0.000558575	1.6754	1.41872	1.6865	0.33368	0.252788	0.62825
clic4	4246.33	1.15729	0.182315	6.34775	2.18486e-10	7.62739e-09	173.946	152.685	182.183	80.2739	82.7338	73.3377
CLIP1_(2_of_2)	86.0184	1.44346	0.435226	3.31657	0.000911313	0.00621874	7.19437	3.48927	4.64815	1.19171	2.56399	2.09417
clip1a	487.957	-1.1847	0.301115	-3.93439	8.34071e-05	0.000806596	13.5018	22.6995	17.3586	31.8426	50.8103	44.0194
clocka	295.162	-1.50066	0.191992	-7.81625	5.44197e-15	3.47886e-13	11.6785	13.8804	11.8466	32.224	40.5183	37.2343
clstn2	91.7072	2.28029	0.458476	4.97362	6.57125e-07	1.10145e-05	5.07548	5.98161	5.84104	1.04871	1.30005	1.2565
cmtm6	4467.17	1.6757	0.178326	9.39683	5.62302e-21	6.43683e-19	181.485	215.875	201.146	59.8241	66.3026	68.186
cmtm7	117.169	1.60387	0.416328	3.85242	0.000116955	0.00108077	3.10442	2.41565	2.96165	1.47773	0.758363	0.670133
cnksr3	254.24	-1.2293	0.257124	-4.78094	1.74479e-06	2.63719e-05	10.3973	10.5062	13.3686	22.7856	33.2235	27.3917
cntf	87.1004	1.06481	0.238753	4.45987	8.20093e-06	0.000105952	4.48416	3.48927	3.53753	1.95441	2.09453	1.63345
cntnap2b	32.0165	-5.46664	0.537133	-10.1774	2.50059e-24	3.62022e-22	0.394212	0.0383437	0.164536	8.96169	8.41422	8.50231
col11a1a	241.794	2.08776	0.725827	2.87639	0.00402249	0.0213057	11.5307	17.6764	14.6026	3.62281	4.08072	2.97372
col12a1a	230.583	2.01004	0.689563	2.91494	0.00355755	0.0192222	29.9601	6.32671	3.08506	3.19379	4.08072	2.97372
COL13A1	21.7899	2.35031	0.702345	3.34638	0.000818742	0.00569494	2.36527	1.91718	3.37299	0.905703	0.397238	0.2513
COL15A1_(2_of_2)	614.404	4.21912	0.473058	8.9188	4.71355e-19	4.6096e-17	21.2875	23.3513	25.9145	1.14405	1.19171	1.59157
col15a1b	69.3375	1.84293	0.543405	3.39144	0.00069526	0.0049791	5.61752	8.93408	12.5459	3.24146	1.98619	2.55488
col16a1	234.733	2.27438	0.34164	6.65724	2.79023e-11	1.09003e-09	15.7192	20.2838	11.7232	3.43214	3.4668	3.35067
col18a1	516.487	-1.05728	0.323507	-3.26819	0.00108239	0.00720311	29.0239	44.402	40.6816	81.6563	91.5453	72.7513
col19a1	34.8149	1.37474	0.421775	3.25941	0.00111642	0.0073863	1.72468	2.49234	2.87939	0.810366	0.938926	1.08897
COL23A1_(2_of_2)	23.2833	2.96395	0.781646	3.79194	0.000149478	0.00134594	3.05514	5.32977	1.15175	0.238343	0.613913	0.418833
col2a1b	105.209	2.20672	0.484114	4.55827	5.15771e-06	6.99284e-05	4.8291	6.74849	8.55589	1.28705	1.84174	1.38215
col4a1	27.3541	-1.85673	0.684818	-2.71128	0.00670249	0.0321663	1.03481	0.72853	1.64536	3.57514	6.03079	3.18313
COL5A2_(2_of_2)	58.23	2.4037	0.527565	4.55621	5.20844e-06	7.03687e-05	1.03481	2.07056	1.56309	0.381349	0.252788	0.293183
col5a2b	72.8558	6.19403	1.06624	5.80924	6.27586e-09	1.59785e-07	4.87838	7.36199	5.92331	0.0953372	0	0.167533
col5a3a	20.4336	1.77284	0.638984	2.77447	0.00552925	0.027566	3.3508	1.18865	1.11062	0.572023	0.722251	0.418833
col8a1a	106.041	5.71397	0.595868	9.58932	8.86638e-22	1.06447e-19	8.37701	10.8129	10.5715	0.286011	0.14445	0.167533
col9a2	34.6484	4.33451	0.872371	4.96865	6.742e-07	1.12623e-05	1.82323	3.60431	1.43969	0.0476686	0.252788	0.0418833
comtb	9.79972	2.55247	0.727903	3.5066	0.000453865	0.00349074	3.05514	1.30368	1.85103	0.524354	0.325013	0.2513
cops8	547.91	1.11745	0.224891	4.96883	6.73589e-07	1.12623e-05	32.7689	22.9679	31.0974	17.7804	11.4838	12.1043
coq7	91.7927	-1.0244	0.355193	-2.88405	0.00392593	0.0208991	2.41455	1.57209	2.34464	4.71919	3.68348	4.90035
coq9	72.4266	-1.37512	0.45858	-2.99864	0.00271184	0.015426	1.42902	0.920248	3.04392	6.19692	3.53903	4.64905
coro1b	41.4275	-1.10014	0.30796	-3.57235	0.000353786	0.00281182	1.37974	0.881904	1.64536	3.00312	2.74455	2.88995
CORO2A_(2_of_2)	16.4044	-5.25251	0.794904	-6.60773	3.90263e-11	1.49301e-09	0.0492765	0.0766873	0.164536	3.3368	1.84174	6.45003
coro2a	2163.46	-1.04768	0.255615	-4.09867	4.15531e-05	0.000439945	64.2566	53.7195	45.7822	114.834	114.549	122.174
cotl1	797.707	1.31244	0.265237	4.94818	7.4912e-07	1.23325e-05	46.4185	31.5185	27.1074	22.0706	10.8338	10.8059
cox14	54.7113	-1.31458	0.516692	-2.54423	0.0109518	0.0475523	1.33047	0.805217	2.01557	4.95753	2.85289	2.80618
cox4i2	176.833	1.11921	0.365316	3.06369	0.00218627	0.0129709	1.57685	2.07056	1.48083	0.715029	0.975039	0.7539
cplx2	7.74468	-2.53771	0.68844	-3.68617	0.000227655	0.00193987	0.394212	0.230062	0.20567	2.33576	1.04726	1.54968
cpn1	1180.68	1.20084	0.319551	3.75791	0.00017134	0.0015178	88.3528	96.0892	99.8324	51.1961	32.5374	43.9356
cpne4b	36.1522	5.87229	1.0095	5.81705	5.98955e-09	1.53024e-07	3.89285	1.30368	1.89217	0.0476686	0	0.0837666
cpped1	122.542	-1.39762	0.392695	-3.55904	0.000372217	0.00293775	3.59719	7.8988	7.65094	22.0706	15.095	14.8686
cpt1ab	67.2666	-1.9757	0.495014	-3.9912	6.57399e-05	0.00065905	3.69574	1.87884	3.41413	17.4467	11.0504	7.87406
cpt2	90.6458	-1.36039	0.243372	-5.58976	2.2739e-08	5.18189e-07	3.9914	3.56596	3.00279	9.48605	10.0032	8.58608
CR361561.2	26.3172	-2.32531	0.465587	-4.99436	5.90313e-07	9.97386e-06	0.542042	1.15031	0.822681	4.05183	5.01964	4.10457
CR388052.1	88.8163	3.40896	0.495983	6.87313	6.2809e-12	2.70408e-10	3.64646	6.01996	8.39135	0.619692	0.43335	0.712016
CR391991.3	8.16509	5.02045	0.981054	5.11741	3.09768e-07	5.61959e-06	1.18264	2.99081	3.37299	0.0476686	0.14445	0.0418833
CR450785.2	39.5563	2.16698	0.409051	5.29758	1.17349e-07	2.32947e-06	1.42902	1.72547	1.27516	0.190674	0.361125	0.460717
CR589947.1	50.5722	-3.036	0.591249	-5.1349	2.82293e-07	5.17841e-06	0.689871	0.996935	0.329073	3.62281	3.39458	10.2614
CR749167.1	74.8323	1.32658	0.324019	4.09415	4.23719e-05	0.000446295	3.84357	4.40952	2.71485	1.52539	1.55284	1.46592
CR762475.2	58.8953	3.49035	0.57644	6.05501	1.40409e-09	4.07352e-08	2.41455	3.25921	5.18289	0.143006	0.505576	0.335067
CR792418.1	76.6069	1.1576	0.295874	3.91247	9.13582e-05	0.000872631	3.94212	4.2178	4.89495	2.00208	2.41954	1.63345
CR792418.2	39.2775	2.16003	0.517146	4.17683	2.95606e-05	0.000327473	1.28119	2.22393	2.09784	0.286011	0.505576	0.5026
CR847895.3	270.043	1.9927	0.206412	9.65401	4.72696e-22	5.76885e-20	13.3047	15.5675	13.821	2.86011	4.26128	3.97892
CR847899.1	57.1811	-1.01191	0.304581	-3.32231	0.000892748	0.00611183	1.28119	1.99387	0.90495	2.4311	3.14179	3.22502
crb2a	240.447	3.06589	0.513034	5.97599	2.287e-09	6.31254e-08	11.8756	10.7746	17.3997	2.71711	1.08338	1.13085
creb3l1	930.862	1.13723	0.328511	3.46178	0.000536622	0.00400015	8.37701	10.4295	8.10341	3.62281	5.30854	3.7695
creg2	125.329	-1.56673	0.267052	-5.86676	4.44385e-09	1.16766e-07	2.11889	2.22393	2.30351	5.57722	8.23366	6.61756
cremb	16.6911	2.17776	0.779184	2.79492	0.00519127	0.0261195	2.71021	3.22087	4.64815	1.04871	0.902814	0.460717
crfb15	73.2961	1.068	0.373374	2.86041	0.00423091	0.0221395	2.26672	3.22087	5.3063	1.47773	2.45565	1.38215
crfb2	14.686	-1.36569	0.520134	-2.62565	0.00864848	0.0395506	0.591318	0.613499	0.411341	1.6684	1.51673	1.13085
crip1	125.524	2.07867	0.60775	3.42027	0.000625582	0.00455908	16.6555	2.18559	7.32186	2.86011	1.55284	2.0104
CROCC2	35.1796	2.33332	0.58965	3.95712	7.58579e-05	0.000746298	2.16817	1.53375	2.13897	0.238343	0.252788	0.712016
crp4	30.9554	-6.1012	0.963361	-6.33324	2.40069e-10	8.28295e-09	0	0.153375	0.0411341	5.19588	3.68348	5.73801
cry-dash	537.932	2.09876	0.176569	11.8864	1.39296e-32	3.95575e-30	28.6297	23.1212	25.0507	6.72127	5.48911	6.40815
csnk1e	231.905	1.98425	0.526248	3.77056	0.000162881	0.00145246	1.6754	2.22393	2.63258	0.33368	0.577801	0.795783
csrp1a	635.04	1.413	0.31256	4.52073	6.16271e-06	8.16919e-05	15.8178	12.3467	14.6849	6.43526	5.99468	4.23022
csrp2	512.853	-1.60559	0.236144	-6.79919	1.05211e-11	4.41378e-10	11.7278	15.6442	13.6976	40.3753	36.1487	53.108
CT573234.2	49.4855	1.25578	0.367499	3.41709	0.000632936	0.00460196	3.79429	2.64571	3.12619	0.858034	1.48061	1.80098
CT573263.1	62.6981	-1.2342	0.285576	-4.3218	1.5476e-05	0.000185498	1.72468	1.34203	1.9333	3.86115	3.61125	4.69093
CT737138.1	51.123	-2.44027	0.393015	-6.20911	5.32867e-10	1.71483e-08	0.985531	1.41872	0.90495	4.43318	8.9198	5.40295
CT956057.1	5.61977	-6.56166	1.43193	-4.58239	4.59686e-06	6.33226e-05	0	0	0.0411341	1.28705	1.91396	1.29838
ctsl.1	17.1446	-2.28971	0.864339	-2.64909	0.00807088	0.0373263	0.739148	0.42178	0.90495	5.05287	2.38343	2.93183
ctslb	700.499	6.40022	0.697638	9.17413	4.55217e-20	4.9067e-18	7.19437	8.66567	7.89774	0.143006	0.0722251	0.0837666
CTTNBP2NL_(1_of_2)	32.2023	1.69097	0.492832	3.43112	0.000601089	0.00440729	2.5131	2.56903	4.19568	0.810366	0.866701	1.29838
CU019646.1	181.882	-1.05143	0.215511	-4.8788	1.06735e-06	1.70395e-05	11.0379	13.4203	10.9417	21.7369	27.6261	26.8891
CU138503.1	23.5628	-1.3043	0.37495	-3.47859	0.000504051	0.00379955	0.739148	1.03528	0.740413	2.19275	2.3112	1.96852
CU207245.2	96.8352	-1.33839	0.359472	-3.7232	0.000196714	0.00170845	4.23778	3.41259	2.46804	7.96065	11.6644	6.95263
CU570769.1	257.85	-2.55367	0.239225	-10.6747	1.33657e-26	2.32201e-24	6.40595	6.51842	5.96444	39.6603	29.5039	45.6947
CU570881.1	72.0093	5.10536	0.662092	7.71095	1.24886e-14	7.61213e-13	5.22331	2.95246	2.71485	0.0476686	0.108338	0.167533
CU570881.3	19.6536	-7.77277	1.23837	-6.27661	3.46044e-10	1.16402e-08	0	0	0	1.90674	1.55284	1.88475
CU633855.1	45.955	1.43907	0.561892	2.56112	0.0104334	0.0458405	4.43489	10.2761	8.26795	3.28913	2.45565	3.0156
CU984600.2	20.3949	-1.42218	0.491175	-2.89547	0.00378595	0.0202635	1.33047	0.575155	1.39856	1.81141	4.36962	2.97372
cx30.3	397.859	-1.6343	0.342863	-4.76663	1.87329e-06	2.81987e-05	7.88424	6.90186	4.23681	17.2084	22.787	21.4861
cx32.3	16.932	4.54707	0.823756	5.51992	3.39159e-08	7.46403e-07	1.6754	1.68712	1.23402	0.0476686	0.108338	0.0418833
cx34.5	22.9949	3.90944	0.692397	5.64624	1.63997e-08	3.83795e-07	2.61166	1.64878	1.15175	0.0953372	0.0722251	0.209417
cxcl12a	560.882	3.87312	0.291875	13.2698	3.46609e-40	1.59949e-37	65.6856	52.2624	73.5477	4.95753	3.43069	5.15165
cxcl12b	4103.4	3.74212	0.259391	14.4265	3.52377e-47	2.36525e-44	97.5675	111.733	103.822	7.96065	7.54752	8.75361
cxcr3.3	85.9797	-1.12231	0.397744	-2.82168	0.0047773	0.024419	1.77395	1.57209	1.11062	2.76478	3.06957	4.23022
cyp24a1	377.167	2.44768	0.461831	5.29996	1.15831e-07	2.30523e-06	10.7423	8.09051	8.22681	2.28809	0.975039	1.88475
cyp2aa1	68.3821	-1.8382	0.455976	-4.03136	5.54559e-05	0.000564771	2.56238	2.87578	3.00279	8.199	14.7339	8.46043
cyp2aa2	593.258	-3.1342	0.307352	-10.1974	2.03604e-24	3.037e-22	10.2495	16.5261	11.4764	120.84	137.48	90.1329
cyp2k8	1236.38	1.31735	0.215447	6.11449	9.68669e-10	2.91331e-08	56.9637	51.5722	61.4132	21.2125	27.3733	22.1563
cyp2p10	115.243	1.1135	0.217397	5.12195	3.02395e-07	5.49258e-06	4.28706	4.37118	5.47083	2.38343	1.98619	2.42923
cyp2p9	14.7027	-1.38408	0.544708	-2.54096	0.0110548	0.0477747	0.295659	0.498468	0.822681	1.23938	2.0223	1.13085
cyp2x6	1722.97	3.24507	0.270938	11.9771	4.68207e-33	1.35569e-30	154.975	201.074	149.193	18.6861	18.0202	18.5543
cyp2x7	302.465	2.39136	0.294746	8.11327	4.92741e-16	3.51513e-14	16.3105	16.2577	18.2224	3.76582	4.11683	2.13605
cyp2x8	11.0339	-3.62293	0.666681	-5.43428	5.5018e-08	1.16564e-06	0.197106	0.115031	0.164536	1.85907	2.05841	2.09417
cyp4f3	54.3238	1.08419	0.335849	3.2282	0.00124572	0.00808951	1.77395	1.26534	1.64536	0.429017	0.938926	0.87955
cyp4v7	54.1344	7.20069	1.06096	6.78697	1.14509e-11	4.74989e-10	4.97693	3.22087	3.53753	0.0476686	0.0361125	0
cyr61l1	59.4993	1.29579	0.356224	3.63759	0.000275205	0.002278	2.21744	2.95246	2.26237	1.23938	1.1556	0.7539
CYSLTR2_(2_of_2)	17.8551	-1.28169	0.411132	-3.11748	0.00182407	0.0110894	1.23191	1.53375	1.27516	2.71711	3.64737	3.85327
dab1b	8.40633	-2.08158	0.698827	-2.97868	0.00289489	0.0162272	0.246383	0.230062	0.781547	2.09742	1.76951	1.63345
dact1	1270.11	1.29256	0.230798	5.60041	2.13849e-08	4.88839e-07	80.4193	118.674	111.391	45.3328	44.7434	41.0875
dact2	3401.02	1.30096	0.260778	4.98876	6.07692e-07	1.02558e-05	115.455	147.24	134.961	56.5826	57.5273	53.0662
dao.2	7.34772	-2.39748	0.73168	-3.27668	0.00105035	0.00701201	0.197106	0.153375	0.493609	2.00208	1.37228	1.21462
daw1	119.669	4.3004	0.736022	5.84276	5.13423e-09	1.32316e-07	1.33047	1.64878	1.6865	0.0476686	0.108338	0.0837666
dbn1	126.114	-1.03526	0.247695	-4.17959	2.92031e-05	0.00032473	5.46969	6.17333	6.25238	13.8716	12.82	11.3085
dbx1a	617.183	2.71862	0.446656	6.08661	1.15328e-09	3.40611e-08	14.8322	14.3022	18.8805	2.00208	2.96123	2.59677
dcaf15	273.908	1.64231	0.150512	10.9114	1.01637e-27	2.02821e-25	17.099	17.1013	16.2068	4.76686	5.59744	6.36626
dchs1b	348.231	-1.08422	0.370607	-2.92554	0.00343862	0.0186616	25.0818	25.4219	18.3047	42.568	63.0525	46.323
dck	64.9635	1.35153	0.342815	3.94245	8.06543e-05	0.000784475	4.68127	2.07056	3.6198	1.62073	1.40839	1.17273
dclk1a	38.9896	-1.87391	0.343462	-5.45596	4.87092e-08	1.03943e-06	1.92178	0.843561	1.39856	4.2425	7.58363	3.85327
dcxr	439.719	2.6964	0.314445	8.57512	9.89844e-18	8.44915e-16	31.7834	32.4771	41.9156	7.15029	3.82793	5.94743
ddit4	4534.19	1.40488	0.401405	3.4999	0.00046543	0.00355929	215.979	259.012	245.817	101.82	96.4566	83.4316
ddx43	1072.61	1.59268	0.304184	5.2359	1.64179e-07	3.14661e-06	100.228	84.6245	86.217	25.1213	28.6011	39.7054
def6c	50.2062	1.04583	0.339928	3.07661	0.00209366	0.0124826	2.36527	2.30062	2.26237	1.14405	1.08338	1.2565
dennd4a	252.972	1.53683	0.367765	4.17885	2.92983e-05	0.000325397	9.95386	9.04911	10.3247	3.09846	4.40573	2.97372
desi2	883.832	1.49331	0.192418	7.76076	8.44246e-15	5.28262e-13	45.5808	43.29	48.6616	17.6374	13.3255	19.6433
desma	23.0392	3.07062	0.580127	5.29301	1.20321e-07	2.37537e-06	1.97106	1.11197	1.60423	0.143006	0.180563	0.2513
dfnb31a	30.1357	1.16418	0.372063	3.12898	0.00175414	0.0107438	1.28119	1.26534	1.19289	0.619692	0.686138	0.418833
dgkaa	50.6444	1.32114	0.348518	3.79073	0.000150207	0.00135168	2.26672	1.99387	2.09784	1.00104	0.650026	1.0052
dgkb	191.458	4.60492	1.12353	4.09863	4.15605e-05	0.000439945	12.7133	1.99387	20.855	0.762697	0.361125	0.37695
dhcr24	65.9363	1.041	0.3474	2.99656	0.00273046	0.0154841	1.57685	3.71934	2.79712	1.57306	1.48061	1.04708
dhdhl	41.095	2.08228	0.439854	4.73403	2.20106e-06	3.24382e-05	3.20297	2.7224	1.64536	0.476686	0.541688	0.837666
dhfr	1253.48	-1.39027	0.269512	-5.15848	2.48959e-07	4.6302e-06	48.3403	24.4249	33.1952	134.092	81.8671	70.6572
dhrs13a.3	394.982	-1.358	0.135366	-10.0321	1.10177e-23	1.53488e-21	13.3539	13.6503	12.9572	33.368	39.5793	33.2972
dhrs2	64.9132	-1.17734	0.33579	-3.50618	0.000454589	0.00349427	3.00587	1.53375	2.0567	6.38759	4.65852	4.31398
dhrs3a	22.3934	5.89998	0.963221	6.12527	9.05323e-10	2.75648e-08	3.69574	3.75768	7.15733	0.0953372	0.0361125	0.12565
dhrs3b	3834.07	1.3042	0.2916	4.47257	7.72839e-06	0.000100551	180.056	170.629	215.337	95.2895	66.5915	74.6361
dhrs7b	30.2441	-3.52852	0.611395	-5.77126	7.8679e-09	1.95598e-07	0.295659	0.153375	0.287939	2.4311	3.82793	2.47112
dhrs9	465.819	1.71875	0.221942	7.74413	9.62384e-15	5.94625e-13	16.1134	13.4586	13.9856	6.33992	3.39458	4.0208
dhx58	10.1519	-3.79387	0.694285	-5.46443	4.64402e-08	1.00114e-06	0.197106	0.153375	0.164536	2.95545	1.37228	3.0156
dip2bb	12.9325	-2.08534	0.591776	-3.52387	0.000425298	0.00330025	0.492765	0.230062	0.452475	1.14405	2.05841	1.92663
dixdc1a	229.979	-1.65958	0.318669	-5.20786	1.91032e-07	3.62593e-06	4.38561	5.86658	5.7999	20.1638	16.3951	15.9157
dkk1b	4533.11	3.59956	0.30918	11.6423	2.51204e-31	6.28733e-29	27.1514	24.3866	29.1229	2.86011	2.23898	1.80098
dld	2158.07	1.80381	0.331305	5.44455	5.19374e-08	1.10513e-06	307.486	340.569	318.995	105.777	109.349	71.7042
dll4	33.977	2.46878	0.684592	3.6062	0.000310713	0.00252938	2.02034	2.91412	3.7432	0.66736	0.2889	0.670133
dlx2a	171.639	-2.07908	0.335056	-6.20518	5.46353e-10	1.75391e-08	2.06961	3.37424	2.92052	16.3027	8.66701	11.6017
dlx4b	25.5787	-1.45824	0.518654	-2.81158	0.00492991	0.0251034	0.788424	0.843561	0.740413	2.86011	2.13064	1.7591
dmbx1a	641.956	-1.29158	0.271243	-4.76171	1.91957e-06	2.88072e-05	22.2237	29.8314	35.293	67.451	78.292	75.725
dmrt1	41.018	2.55221	0.533767	4.78152	1.73977e-06	2.6323e-05	1.6754	2.60737	3.53753	0.381349	0.613913	0.37695
dmrt2b	14.7451	-2.97226	0.585203	-5.07902	3.79396e-07	6.6936e-06	0.344936	0.383437	0.329073	2.90778	2.3112	3.39255
DNAH11	49.6278	-2.39644	0.427382	-5.60724	2.05574e-08	4.71384e-07	1.28119	2.07056	2.0567	8.58034	11.1949	9.84258
dnah1	84.6503	2.80741	0.563409	4.9829	6.26382e-07	1.05471e-05	7.83497	3.87271	6.91052	0.381349	1.98619	0.37695
dnah7	52.2347	1.78291	0.333249	5.35009	8.79082e-08	1.80297e-06	2.36527	2.95246	2.87939	0.858034	0.902814	0.712016
dnah9	52.958	1.13638	0.270922	4.19448	2.73493e-05	0.000306424	2.95659	3.10584	3.4964	1.6684	1.1556	1.71722
dnajb2	31.5735	1.13443	0.4446	2.55157	0.0107238	0.0467408	3.30153	2.56903	2.63258	1.09638	1.98619	0.921433
dnajb6b	435.096	1.99091	0.283414	7.02477	2.14426e-12	9.92609e-11	16.9018	12.1166	20.6904	4.38551	3.82793	4.73282
DNAJC11_(2_of_2)	25.1039	1.37012	0.391651	3.49833	0.000468189	0.00357484	1.4783	1.95553	2.46804	0.619692	0.902814	0.837666
dnajc28	45.4218	-1.05001	0.411216	-2.55343	0.0106668	0.0465751	1.57685	1.41872	2.71485	3.76582	3.61125	4.85846
dnmt3ab	59.967	2.43664	0.326691	7.45852	8.74972e-14	4.78545e-12	3.74502	4.06443	6.21125	0.715029	1.22783	0.712016
dnmt3bb.1	4046.35	-1.0441	0.223018	-4.68166	2.84555e-06	4.07963e-05	138.171	160.622	136.976	296.451	328.769	307.214
dnph1	87.536	1.09748	0.278751	3.93715	8.24558e-05	0.000798443	2.80876	2.53068	3.37299	1.38239	1.37228	1.46592
dock11	542.763	2.36959	0.657552	3.60365	0.00031378	0.00255014	63.6653	22.9679	7.6098	4.71919	6.42803	7.99971
dock5	234.642	1.29883	0.402603	3.22607	0.00125501	0.00813908	9.46109	8.35892	8.30908	2.28809	3.90015	4.85846
dock8	60.6653	-1.09562	0.300115	-3.65068	0.00026155	0.00218107	3.00587	2.454	2.26237	5.72023	5.70578	5.65425
dopey2	615.862	1.06825	0.266212	4.01277	6.00101e-05	0.000607798	39.1748	26.9173	31.591	16.1596	18.8146	13.3608
dpp7	1762.93	1.0113	0.203566	4.96795	6.76635e-07	1.12902e-05	347.498	347.969	328.785	210.647	163.012	151.701
draxin	56.6229	6.48291	0.871098	7.44222	9.90061e-14	5.35539e-12	3.54791	4.67793	6.08784	0.0476686	0.0361125	0.0837666
drl	18.7414	2.39246	0.809945	2.95386	0.0031383	0.0174157	3.00587	3.18252	3.33186	0.66736	0.541688	0.670133
dse	192.637	1.18068	0.425434	2.77524	0.00551613	0.0275192	9.90458	11.6181	17.5231	4.81453	6.82527	6.19873
DTWD2	390.375	-2.6736	0.295847	-9.03711	1.60867e-19	1.63829e-17	2.5131	5.48315	4.56588	26.8851	28.3122	28.1456
duox	1793.4	1.85938	0.233492	7.96336	1.6743e-15	1.12384e-13	71.8452	74.9235	54.009	12.5845	26.2177	18.8894
DUOXA1	249.57	2.73112	0.289235	9.44255	3.63809e-21	4.23021e-19	10.7916	8.93408	9.50197	1.71607	1.1556	1.71722
DUPD1_(1_of_11)	22.0175	3.53323	0.693219	5.09684	3.45364e-07	6.17595e-06	1.77395	1.34203	2.09784	0.190674	0.0361125	0.2513
dusp10	15.9486	-2.58983	0.510453	-5.0736	3.90361e-07	6.85429e-06	0.197106	0.230062	0.493609	2.00208	2.05841	1.71722
dusp22b	46.6911	1.14151	0.27979	4.07987	4.5061e-05	0.000471926	3.89285	2.18559	3.37299	1.09638	1.62506	1.67533
dusp4	1444.46	1.48351	0.294899	5.03055	4.89066e-07	8.38796e-06	35.0356	37.9219	34.6349	12.6322	13.0005	14.2822
dusp6	5909.18	1.28083	0.269967	4.74439	2.09136e-06	3.10382e-05	340.747	403.682	377.611	150.299	177.999	150.738
dync1li1	1750.18	2.5756	0.217714	11.8302	2.72389e-32	7.58939e-30	187.891	161.925	129.079	25.169	28.3845	29.9885
dyrk2	1833.49	-1.00242	0.144785	-6.92354	4.40487e-12	1.92446e-10	88.6485	95.2457	90.495	172.084	199.088	199.406
dyrk4	13.674	-2.53067	0.537344	-4.7096	2.48203e-06	3.58982e-05	0.344936	0.230062	0.20567	1.19171	2.20287	1.21462
e2f5	181.437	-1.08504	0.157914	-6.8711	6.37093e-12	2.73487e-10	7.44076	6.21168	7.89774	14.9679	15.1312	17.214
ebf2	65.9983	-1.82881	0.635263	-2.87882	0.00399161	0.0211801	1.57685	2.41565	2.22124	9.29537	7.65586	5.86366
echdc2	112.507	-1.906	0.300811	-6.33621	2.35484e-10	8.14376e-09	3.3508	3.14418	2.75598	15.0633	11.0143	9.75881
ecm1b	153.371	2.63906	0.557836	4.73088	2.23545e-06	3.28467e-05	10.2002	2.1089	3.66093	0.905703	0.758363	1.0052
ecscr	9.89128	7.42406	1.46409	5.07078	3.96182e-07	6.94e-06	2.11889	1.41872	3.90774	0	0.0361125	0
eea1	500.231	1.27901	0.190715	6.70638	1.9951e-11	8.09385e-10	54.0564	52.1474	73.8768	22.2612	29.5401	25.0881
eef1da	1005.63	1.10382	0.290537	3.79924	0.000145138	0.00131006	34.5921	27.4924	49.6488	26.0747	12.7838	14.5754
eef2a.2	443.597	2.38229	0.323989	7.353	1.93808e-13	1.01129e-11	45.8272	38.5354	71.4088	10.1057	9.2087	11.5598
efemp2b	1549.01	1.76958	0.271651	6.51418	7.30862e-11	2.69816e-09	142.557	137.884	132.575	43.5691	44.7796	37.2343
efnb1	310.904	-1.06564	0.186231	-5.72215	1.05182e-08	2.55884e-07	14.5366	17.3697	13.9033	27.5048	37.5932	34.5956
ek1	542.643	1.56431	0.195446	8.0038	1.20635e-15	8.20932e-14	34.0501	31.7102	36.7327	13.9192	11.9894	9.96823
elf3	70.1952	1.65507	0.387822	4.26761	1.97578e-05	0.000231719	1.42902	3.14418	2.38578	0.619692	1.1556	0.5026
elovl6	2254.76	4.60831	0.442867	10.4056	2.33742e-25	3.63334e-23	17.1975	14.9157	20.7727	0.762697	0.650026	0.837666
emilin3a	707.552	3.92688	0.797245	4.92556	8.41191e-07	1.36955e-05	10.4959	13.4203	16.2068	0.858034	0.866701	1.0052
eml1	67.7154	-1.48512	0.360687	-4.11749	3.83025e-05	0.000410584	0.985531	2.99081	2.18011	6.91194	4.51407	6.5338
eml2	487.723	1.20987	0.262372	4.61127	4.00216e-06	5.57546e-05	22.1744	18.4433	22.2947	9.1047	8.99202	10.0939
emp3b	35.4449	-4.38411	0.412575	-10.6262	2.25069e-26	3.86464e-24	0.246383	0.613499	0.411341	10.2964	7.29473	10.4289
enc3	782.184	1.16909	0.225228	5.19071	2.09498e-07	3.95609e-06	53.6129	53.9112	57.5466	27.7908	24.4843	23.706
enpp1	209.915	-1.70071	0.354082	-4.80314	1.562e-06	2.39536e-05	2.21744	2.7224	6.37578	13.2519	12.0616	12.6488
enpp2	148.053	2.51094	0.500158	5.0203	5.1592e-07	8.7873e-06	2.36527	1.99387	2.75598	0.572023	0.43335	0.293183
enthd2	27.9506	-1.13568	0.338756	-3.35251	0.00080082	0.00560726	1.97106	1.34203	1.52196	3.47981	4.00849	3.47632
entpd5b	143.662	1.054	0.33602	3.13673	0.00170844	0.0105163	4.38561	5.90493	6.45805	2.24042	3.39458	2.72242
epas1b	69.2191	-1.38997	0.343257	-4.04936	5.13577e-05	0.00052751	1.42902	1.80215	2.0567	3.14613	7.07806	4.18833
epha4a	3804.88	2.32413	0.442792	5.24881	1.53085e-07	2.94734e-06	64.503	86.7717	80.6228	18.4001	16.1062	13.3608
epha4l	37.5185	1.71503	0.564887	3.03605	0.00239698	0.0139411	1.52757	2.22393	1.89217	0.429017	0.722251	0.62825
epha7	1469.35	1.01192	0.251887	4.01734	5.8859e-05	0.000596958	15.325	16.1427	18.6337	10.9638	8.52256	6.19873
ephb2b	104.259	1.16985	0.274746	4.25792	2.06335e-05	0.000239729	4.87838	3.91105	4.19568	1.71607	1.91396	2.34547
EPHB3_(2_of_2)	778.468	2.41121	0.362166	6.65774	2.78063e-11	1.09003e-09	42.23	62.2318	55.531	11.2498	13.9033	5.98931
ephb6	259.955	3.83526	0.300833	12.7488	3.16591e-37	1.19874e-34	15.4236	20.5139	23.4876	1.04871	1.7334	1.5078
ERRFI1_(1_of_2)	157.614	1.35724	0.455878	2.97721	0.00290882	0.0162892	1.97106	1.80215	1.23402	0.619692	0.975039	0.418833
esrra	659.759	1.10535	0.265655	4.16085	3.17071e-05	0.000348118	59.7232	75.0002	74.7406	29.5545	37.7737	33.6742
esrrd	40.4346	-1.25975	0.412248	-3.0558	0.00224459	0.013253	1.33047	1.76381	1.39856	3.24146	4.26128	3.68573
esrrga	177.887	3.13732	0.295838	10.6048	2.82938e-26	4.7479e-24	25.3281	16.6795	25.0095	2.86011	2.56399	2.47112
esyt1a	152.99	-1.47647	0.280758	-5.25885	1.44957e-07	2.80547e-06	8.1799	6.63346	5.47083	15.969	22.8592	19.8527
esyt1b	2102.81	-2.17704	0.252452	-8.62359	6.48855e-18	5.66961e-16	30.5514	53.9879	77.7434	212.84	296.556	249.96
etv4	4543.97	1.45285	0.215422	6.74419	1.53884e-11	6.29477e-10	84.3121	105.062	83.461	35.5131	38.0987	29.7372
evla	82.5711	1.06423	0.405007	2.62768	0.00859701	0.0393528	5.86391	3.02915	4.27794	1.95441	2.6001	1.96852
f10	147.139	2.31749	0.53161	4.35938	1.30431e-05	0.000159402	5.56825	6.51842	6.66372	1.71607	1.87785	0.293183
FAAH	63.0121	-1.56999	0.369069	-4.25392	2.10057e-05	0.000243745	2.95659	2.03221	3.4964	7.29329	10.256	8.5442
fabp3	253.302	2.58142	0.532134	4.85108	1.22792e-06	1.93312e-05	28.1862	8.5123	33.9356	6.10158	2.38343	3.64385
fadd	753.891	3.52351	0.396641	8.88337	6.48625e-19	6.30148e-17	12.467	11.6565	16.3714	1.62073	1.19171	0.837666
FADS6	91.8501	2.7857	0.458574	6.0747	1.2422e-09	3.64573e-08	1.82323	2.64571	2.0567	0.238343	0.361125	0.37695
fam110a	445.991	1.14588	0.208612	5.49288	3.95429e-08	8.62525e-07	10.7423	11.0046	9.00836	4.33784	4.76686	5.31918
fam110c	91.3446	1.89284	0.513901	3.68328	0.000230251	0.00195602	2.46383	6.63346	5.5531	1.47773	1.51673	1.08897
fam129bb	179.019	2.79999	0.720053	3.88858	0.000100831	0.000951416	19.8092	9.43254	16.7004	1.57306	2.0223	3.2669
FAM132B	42.3641	-2.05304	0.428966	-4.78602	1.70125e-06	2.58727e-05	0.985531	1.18865	1.48083	7.38863	4.51407	3.7695
fam134b	65.6811	1.13787	0.376727	3.0204	0.00252439	0.0145559	2.16817	2.37731	2.83825	0.858034	1.19171	1.42403
fam160a1b	21.4069	5.51248	1.12543	4.89813	9.67548e-07	1.56151e-05	1.03481	1.03528	1.52196	0	0.0722251	0
fam167ab	27.4118	-3.07004	0.670061	-4.58173	4.61146e-06	6.3429e-05	0.295659	0.498468	0.411341	3.05079	3.57514	3.93703
fam168a	274.713	-1.1578	0.386493	-2.99566	0.00273853	0.015518	2.316	3.75768	3.04392	6.86428	6.42803	7.83218
fam169ab	353.674	1.73324	0.530706	3.26591	0.00109111	0.00725461	18.528	11.7332	9.0495	2.90778	4.40573	5.026
fam189a2	245.709	1.68655	0.368258	4.57981	4.65407e-06	6.36443e-05	8.27846	13.1135	13.6154	4.57618	3.35847	3.30878
fam49a	47.9992	1.69112	0.653812	2.58655	0.00969413	0.0431704	1.62613	4.25615	2.13897	0.762697	0.938926	0.87955
fam49bb	33.1654	1.56296	0.487771	3.20428	0.00135399	0.0086781	1.37974	2.26228	7.4864	1.14405	1.22783	1.5078
fam69b	14.1122	-1.28761	0.453361	-2.84013	0.00450947	0.023349	0.640595	0.498468	0.452475	1.52539	1.22783	1.2565
fam98b	757.021	1.02245	0.145453	7.02939	2.07436e-12	9.63271e-11	46.4678	38.0369	35.3342	19.6871	20.2952	21.2348
FAR2	459.642	1.18151	0.186421	6.33785	2.32988e-10	8.09537e-09	13.2061	14.1105	12.3814	6.19692	6.10302	5.86366
fbln2	1550.12	5.53135	0.505778	10.9363	7.72718e-28	1.58482e-25	36.7603	39.4173	35.8278	0.619692	0.722251	1.17273
fbn2b	1791.72	2.72849	0.423079	6.44914	1.12488e-10	4.0914e-09	100.081	135.046	119.33	12.9659	25.2427	17.4653
fbxl15	48.0676	2.36234	0.396826	5.95308	2.63139e-09	7.23609e-08	4.04068	3.48927	5.18289	0.572023	1.01115	0.963316
fbxl5	551.914	-1.10748	0.260024	-4.25912	2.05232e-05	0.000238821	17.0497	16.1427	9.99558	27.6954	28.2761	40.8362
fbxo32	439.133	1.07998	0.33228	3.25021	0.0011532	0.00759219	84.0165	79.6015	85.4766	44.5701	38.6765	38.7002
FDXACB1	95.8535	2.55557	0.27971	9.1365	6.4504e-20	6.9024e-18	8.72195	8.62733	9.66651	1.71607	1.22783	1.84287
fermt1	241.83	-1.30037	0.345351	-3.76537	0.000166303	0.0014785	13.1076	14.839	18.0579	40.1369	36.7626	40.2918
fgf13a	59.6226	-1.52047	0.381095	-3.98975	6.61437e-05	0.0006622	0.886977	0.843561	2.46804	3.71815	3.64737	5.10976
fgf17	509.623	2.91763	0.332269	8.78092	1.62147e-18	1.51546e-16	7.04654	9.3942	10.9828	1.28705	1.30005	1.17273
fgf1b	10.8184	-3.42073	0.755974	-4.52493	6.04155e-06	8.03021e-05	0.14783	0.0383437	0.164536	1.04871	1.58895	1.17273
fgf24	1149.84	5.8288	0.367495	15.8609	1.18195e-56	1.24671e-53	30.2065	33.7041	31.8789	0.762697	0.577801	0.418833
fgf5	6.95232	-5.93246	1.36839	-4.33535	1.45529e-05	0.000176006	0	0.0766873	0	1.28705	1.40839	2.55488
fgfrl1a	205.381	3.62241	0.408687	8.86354	7.75155e-19	7.33764e-17	4.08995	5.29143	6.54032	0.619692	0.361125	0.37695
fgfrl1b	196.915	4.70905	0.621441	7.57763	3.51911e-14	2.01421e-12	2.41455	2.49234	3.33186	0.0476686	0.180563	0.0837666
fggy	210.075	-1.56125	0.288087	-5.41939	5.98043e-08	1.26161e-06	6.55378	8.89573	7.07506	18.6384	26.7233	23.7897
FH_(2_of_2)	40.1726	2.48799	0.483765	5.14296	2.70438e-07	4.96712e-06	2.66093	1.61043	1.89217	0.33368	0.108338	0.712016
fign	32.4515	-1.28828	0.411627	-3.12973	0.00174965	0.0107208	0.886977	1.72547	1.56309	3.28913	3.35847	3.97892
filip1a	8.10879	-2.82099	0.73009	-3.86389	0.000111595	0.00103708	0.14783	0.191718	0.246804	1.23938	1.69729	1.38215
fkbp11	711.98	1.32599	0.403474	3.28644	0.00101463	0.00681047	33.0153	15.6442	22.6649	11.3928	7.22251	10.8478
FKBP15_(1_of_2)	646.422	-1.20726	0.443218	-2.72386	0.0064523	0.0312705	38.3864	60.0462	70.0925	114.357	145.822	142.864
fkbp16	109.495	4.61875	0.65627	7.03787	1.95197e-12	9.09299e-11	3.74502	1.57209	1.60423	0.0953372	0.0361125	0.167533
fkbp2	572.221	1.06165	0.413907	2.56495	0.0103191	0.0454783	28.876	15.7592	31.8789	16.3027	9.96706	11.5179
FLNB_(1_of_2)	54.4982	-2.56545	0.579063	-4.43035	9.4079e-06	0.000119634	1.4783	2.03221	2.30351	8.48501	12.1699	15.1199
flrt2	56.7358	1.30311	0.439658	2.96392	0.00303747	0.0169262	2.16817	3.48927	2.96165	1.19171	1.58895	0.837666
flrt3	4514.47	1.60095	0.37733	4.24284	2.20707e-05	0.000253435	194.15	222.547	205.465	68.6428	75.8724	68.186
flvcr1	1248.65	2.35694	0.621418	3.79283	0.000148939	0.00134191	132.16	102.953	38.7072	19.8778	19.0674	16.7533
flvcr2a	15.7308	3.23471	0.637209	5.07637	3.84716e-07	6.77128e-06	2.75949	4.86965	3.94887	0.762697	0.108338	0.418833
fn1b	436.544	3.3439	0.324935	10.291	7.73965e-25	1.16624e-22	65.6363	84.241	80.993	8.00832	10.1837	5.36106
fndc3ba	385.702	1.05365	0.3522	2.99162	0.00277499	0.0156589	11.9249	10.9663	14.2735	6.57826	6.21136	5.73801
FO393424.1	44.738	1.1768	0.41309	2.84878	0.0043887	0.0228599	1.82323	1.45706	3.33186	0.66736	1.01115	1.34027
FO704819.2	710.485	1.19141	0.16904	7.04806	1.81425e-12	8.50509e-11	31.0935	31.2884	25.8322	12.6798	14.5895	12.8163
FO834840.1	19.5311	-1.99892	0.772014	-2.58922	0.00961925	0.0429406	0.14783	0.306749	0.411341	1.47773	1.11949	1.0052
FO904898.4	40.9412	3.03971	0.494054	6.15257	7.62351e-10	2.36505e-08	1.03481	1.91718	2.30351	0.190674	0.108338	0.37695
foxa1	254.431	2.06426	0.471916	4.37421	1.21874e-05	0.000150352	2.56238	4.25615	2.96165	0.572023	1.01115	0.837666
foxa	4081.38	2.84895	0.330461	8.62113	6.62943e-18	5.75863e-16	19.6121	24.5016	21.9656	2.86011	2.34732	4.31398
foxa2	7091.64	6.3615	0.390507	16.2904	1.15546e-59	1.70626e-56	101.756	105.56	117.356	1.19171	1.22783	1.67533
foxa3	10731	1.21772	0.436598	2.7891	0.00528545	0.0265441	121.91	155.599	121.469	56.4396	64.3887	57.2126
foxc1a	685.521	9.17505	0.536449	17.1033	1.40265e-65	2.58912e-62	70.0219	114.609	89.9602	0.143006	0.216675	0.12565
foxc1b	86.5452	5.08585	0.415243	12.2479	1.72417e-34	5.4172e-32	15.9163	19.2485	17.3174	0.381349	0.505576	0.712016
foxj1a	702.377	4.59263	0.554025	8.28958	1.13653e-16	8.74124e-15	8.77122	8.81904	8.72042	0.238343	0.505576	0.37695
foxn3	43.0867	1.31553	0.463013	2.84125	0.00449378	0.0233003	3.84357	1.99387	3.16732	1.43006	0.650026	1.67533
foxred1	126.12	-1.03236	0.275217	-3.75107	0.000176083	0.00155515	5.46969	3.56596	3.8666	8.58034	6.75305	11.9786
FP074874.3	28.8088	1.20376	0.399112	3.0161	0.00256048	0.014718	1.52757	2.22393	1.60423	0.66736	0.866701	0.87955
FP102052.1	27.9351	1.15348	0.360651	3.19832	0.00138232	0.00881469	3.89285	2.03221	2.50918	0.953372	1.08338	1.88475
FP102169.1	219.63	3.7209	0.64074	5.80719	6.35306e-09	1.61473e-07	4.97693	3.37424	5.88217	0.286011	0.2889	0.544483
FP103009.1	64.0486	-2.20599	0.499362	-4.41762	9.97955e-06	0.000126279	0.837701	1.15031	1.8099	4.48085	7.36696	6.36626
FP325123.1	813.995	1.20383	0.390954	3.07922	0.0020754	0.0123928	68.4944	34.2409	76.0569	34.9887	17.8396	27.0985
FRRS1_(2_of_2)	201.637	2.62192	0.40003	6.5543	5.5902e-11	2.10588e-09	10.5945	5.36811	5.84104	0.810366	1.51673	1.34027
frrs1a	73.2321	6.38662	0.959834	6.65388	2.85465e-11	1.10642e-09	1.72468	4.06443	4.15454	0.0476686	0.0722251	0
frzb	14842.7	4.98456	0.399196	12.4865	8.84455e-36	3.03738e-33	92.5906	95.2457	94.6906	2.90778	2.99734	3.35067
fscn2a	4.66447	-3.20093	0.935609	-3.42122	0.000623399	0.00454829	0.14783	0.153375	0.0411341	1.09638	1.1556	1.0052
fsd1	48.188	-1.60408	0.376627	-4.25907	2.05279e-05	0.000238821	0.739148	0.651842	0.658145	2.09742	1.87785	2.47112
fsta	519.969	5.09663	0.470396	10.8348	2.35552e-27	4.5174e-25	56.9637	62.5002	81.9802	2.28809	1.91396	1.88475
fstl1a	57.4612	6.3501	0.96375	6.58895	4.42952e-11	1.68584e-09	5.56825	4.8313	10.0778	0.143006	0	0.12565
ftr01	7.47667	5.21632	1.02722	5.07812	3.8119e-07	6.71723e-06	2.56238	2.22393	2.26237	0	0.14445	0.0418833
ftr64	16.5265	-1.16717	0.430092	-2.71377	0.0066522	0.0319769	0.492765	0.613499	0.863816	1.43006	1.33616	1.84287
ftr87	59.2022	1.77204	0.447941	3.95596	7.62272e-05	0.000749432	1.92178	3.83437	3.00279	0.476686	1.04726	1.13085
fzd10	932.205	1.3312	0.356266	3.73652	0.000186582	0.00163226	40.7517	44.1719	69.9279	22.5949	24.1232	16.8371
fzd8b	27446.4	4.48044	0.286429	15.6424	3.74491e-55	3.68674e-52	197.205	188.881	208.55	9.00936	7.58363	11.0153
g0s2	30.0504	-2.72087	0.854971	-3.18242	0.00146051	0.00920501	0.542042	0.996935	2.0567	14.9679	3.97238	5.19353
g6pca.1	7.95553	-2.23754	0.631209	-3.54485	0.00039284	0.00307749	0.295659	0.690186	0.164536	2.19275	1.4445	2.05228
gaa	13.1369	-2.02807	0.481388	-4.21297	2.52034e-05	0.000284105	0.246383	0.345093	0.534743	1.81141	1.76951	1.21462
gabra1	48.0295	-1.92202	0.549318	-3.49892	0.000467153	0.00357062	0.591318	2.83743	2.92052	6.86428	10.0032	8.12536
gadd45aa	137.029	1.21237	0.3535	3.42963	0.000604415	0.00442728	7.44076	3.83437	4.52475	2.14509	2.49177	2.42923
galk2	204.582	2.04056	0.249698	8.1721	3.03073e-16	2.26034e-14	11.4814	9.24083	10.2835	1.95441	2.74455	3.09937
galnt16	40.3315	2.03761	0.597185	3.41203	0.000644814	0.00466763	1.4783	2.07056	2.83825	0.524354	0.541688	0.544483
GALNTL6	23.3798	1.56683	0.531556	2.94763	0.00320217	0.0176772	1.62613	1.15031	1.35742	0.619692	0.252788	0.586366
garnl3	31.6538	-3.84391	0.421143	-9.12733	7.02097e-20	7.45889e-18	0.591318	0.306749	0.781547	6.76894	8.81146	9.25621
gas2l3	88.6572	-1.09343	0.227213	-4.81236	1.49161e-06	2.29922e-05	3.05514	2.41565	2.79712	5.43422	6.46414	6.32438
gbgt1l2	10.5557	-4.27782	0.851868	-5.02169	5.12177e-07	8.74129e-06	0.0492765	0.0766873	0.287939	3.3368	2.38343	2.63865
gdf10b	18.6652	-7.368	1.28251	-5.74499	9.19271e-09	2.26626e-07	0.0492765	0	0	2.09742	1.37228	4.39775
gdpd3a	306.745	-1.0911	0.282152	-3.86706	0.000110156	0.00102694	10.7916	9.81598	10.6949	30.3172	15.8173	22.6589
gfpt1	3298.9	1.11592	0.146206	7.63254	2.30177e-14	1.35961e-12	125.606	156.097	138.951	58.537	75.403	67.5578
gfra1a	177.074	2.76654	0.367677	7.52439	5.29678e-14	2.99684e-12	6.80016	2.7224	4.31908	0.715029	1.19171	0.167533
ggact.1	75.0621	1.70329	0.375646	4.5343	5.77948e-06	7.7166e-05	2.61166	2.83743	2.59145	0.953372	0.938926	0.670133
ggh	46.5615	1.18039	0.407281	2.89821	0.00375299	0.0201309	5.37114	5.59818	3.8666	2.95545	2.49177	1.34027
ggt5a	52.9289	-1.22963	0.403779	-3.0453	0.00232448	0.0136264	2.316	2.41565	2.92052	5.86324	4.47796	8.25101
ghrhra	13.875	1.79774	0.633809	2.8364	0.00456249	0.0235657	3.25225	2.33896	2.01557	0.33368	0.975039	0.963316
gid8b	6226.29	2.00814	0.291687	6.88458	5.79592e-12	2.50258e-10	130.829	99.3485	196.045	38.3255	34.8486	36.2291
gins2	242.309	1.11651	0.344638	3.23967	0.00119669	0.00781927	13.551	7.8988	15.0551	7.38863	5.34466	4.64905
gli1	940.522	1.72453	0.290441	5.93762	2.8919e-09	7.89366e-08	35.9719	44.3253	41.0518	11.9171	13.7228	12.4393
glipr2l	143.282	1.67734	0.325692	5.15007	2.60391e-07	4.8065e-06	7.58859	3.79602	4.64815	1.85907	1.01115	2.34547
glra4a	37.745	1.42891	0.504115	2.83449	0.00458995	0.0236744	1.6754	3.06749	1.64536	0.715029	0.505576	1.2565
glt1d1	67.6517	-1.44498	0.331728	-4.35591	1.32513e-05	0.00016172	3.10442	1.72547	3.20846	6.62593	7.65586	8.33478
gnao1a	197.358	1.8515	0.326907	5.66371	1.48137e-08	3.50568e-07	5.76535	5.94327	5.5531	1.19171	2.23898	1.5078
gng2	178.253	4.19824	0.392789	10.6883	1.15478e-26	2.03008e-24	6.75088	5.90493	4.73042	0.238343	0.43335	0.293183
golim4b	190.274	1.82318	0.465888	3.91335	9.10259e-05	0.000871147	8.96833	9.93101	8.92609	1.90674	3.25013	3.0156
gpd1b	1832.76	-2.0327	0.304925	-6.66624	2.62441e-11	1.03346e-09	46.3199	37.04	33.3186	183.524	122.747	188.14
gpm6ab	797.388	3.22973	0.299193	10.7948	3.64278e-27	6.89653e-25	8.72195	9.12579	12.3402	1.57306	0.794476	1.0052
gpnmb	26.2481	1.90101	0.545891	3.4824	0.000496935	0.00375549	1.13336	2.22393	1.35742	0.286011	0.758363	0.2513
gpr1	34.7958	4.48054	0.492097	9.10498	8.62849e-20	9.10121e-18	3.74502	6.0583	5.47083	0.381349	0.216675	0.12565
gpr157	20.0771	-1.43875	0.447243	-3.21694	0.00129566	0.00836598	0.640595	0.306749	0.370207	1.38239	1.04726	1.21462
gpr35.1	12.0165	2.11028	0.76477	2.75936	0.00579143	0.0286413	1.28119	1.34203	1.64536	0.238343	0.325013	0.460717
gpsm2l	89.7479	-1.41675	0.335086	-4.22801	2.35767e-05	0.000267808	2.56238	3.06749	2.26237	6.00624	7.90865	7.99971
gpx8	288.9	1.01548	0.270616	3.75247	0.000175098	0.0015483	12.9597	6.6718	13.8622	7.05495	3.79182	6.2825
GRAMD2	60.099	-1.29472	0.46626	-2.77681	0.00548948	0.027414	2.56238	1.61043	4.11341	7.86532	5.41688	7.66465
gramd4b	117.807	-1.26089	0.231092	-5.45623	4.86341e-08	1.03933e-06	4.43489	3.79602	3.41413	9.15237	9.31704	10.4289
GRB7	93.7643	-1.82207	0.21143	-8.61783	6.82329e-18	5.89237e-16	2.16817	2.18559	2.92052	8.38967	10.1115	8.16725
greb1	1441.47	1.20982	0.420635	2.87616	0.00402539	0.0213134	142.36	162.385	144.257	59.3474	83.0227	59.3487
grem2a	8.57106	7.97163	1.50873	5.28367	1.26619e-07	2.48642e-06	1.33047	2.30062	1.9333	0	0	0
grhl2b	748.941	-1.27178	0.299495	-4.24641	2.17221e-05	0.000250602	17.3453	29.5246	38.4604	70.4065	70.9611	71.4529
gria2a	19.335	-4.13809	1.59276	-2.59806	0.00937513	0.0421438	0.0985531	0.115031	0.0822681	1.09638	2.67233	1.67533
grid2	27.3412	1.46973	0.398212	3.69084	0.000223518	0.00190792	1.18264	2.07056	3.16732	0.810366	0.722251	0.87955
grip1	224.772	1.5609	0.362153	4.31006	1.63207e-05	0.000195149	5.81463	5.71321	5.6765	2.14509	2.05841	1.84287
grm4	103.132	2.05656	0.252051	8.1593	3.36959e-16	2.48794e-14	5.22331	6.25002	7.65094	1.52539	1.37228	1.88475
grnb	2222.05	-1.90611	0.21243	-8.97288	2.88861e-19	2.88216e-17	68.9379	80.5984	81.4455	283.819	267.413	345.663
gsap	197.756	2.06969	0.38707	5.34707	8.9387e-08	1.8257e-06	4.97693	7.32364	8.76156	1.43006	1.87785	1.88475
gsc	4690.63	4.79825	0.439873	10.9083	1.05257e-27	2.07244e-25	49.2273	41.8329	60.3437	2.24042	1.30005	2.09417
GSK3B_(2_of_2)	159.987	-2.45628	0.966417	-2.54163	0.0110336	0.0477682	3.44936	3.75768	6.58145	27.2664	27.915	22.9102
gsta.1	67.2771	-1.85308	0.428885	-4.3207	1.55534e-05	0.000186275	2.36527	1.03528	1.02835	6.62593	5.27243	4.56528
gsto2	187.433	1.761	0.367071	4.79743	1.60713e-06	2.46188e-05	15.0293	6.74849	8.43248	4.2425	3.35847	1.63345
gyg1a	1002.63	1.21272	0.284452	4.26336	2.01377e-05	0.000235636	26.4615	24.0031	29.9867	14.2529	12.7116	8.92115
gyltl1b	2007.18	-1.07681	0.180615	-5.96193	2.49273e-09	6.86756e-08	68.1494	66.8714	62.7295	130.993	161.784	140.477
hacl1	134.603	-1.65096	0.407195	-4.05447	5.02482e-05	0.000517805	3.89285	2.26228	4.15454	10.2964	11.7366	11.476
hand2	19.6263	2.03665	0.594277	3.4271	0.000610057	0.00445976	2.11889	2.99081	3.00279	0.715029	0.541688	0.795783
has2	357.761	2.84837	0.469597	6.06556	1.31492e-09	3.83744e-08	53.5143	62.6536	66.3493	4.76686	9.38926	12.2299
hdr	202.617	1.22496	0.284915	4.29939	1.7127e-05	0.000203308	3.9914	2.22393	3.45526	1.62073	1.08338	1.59157
hecw2b	46.4705	-1.6385	0.430984	-3.80177	0.000143665	0.00129915	1.72468	1.80215	2.79712	5.57722	8.52256	6.32438
helb	1279.72	1.05342	0.221988	4.74539	2.08103e-06	3.09473e-05	73.3235	129.448	92.3049	39.4696	54.3494	53.9038
hemk1	180.729	-1.39767	0.272363	-5.13164	2.87236e-07	5.25603e-06	2.61166	2.91412	3.99001	9.43838	7.90865	8.62796
hephl1a	316.749	-1.59141	0.261101	-6.09502	1.09424e-09	3.25124e-08	13.4525	12.27	14.5615	47.0012	40.8433	37.695
her1	591.237	3.88487	0.345619	11.2403	2.58392e-29	5.78133e-27	47.9953	52.5308	48.4559	3.05079	4.76686	2.63865
her12	200.125	1.29643	0.284165	4.56225	5.06091e-06	6.8753e-05	19.3164	17.6381	19.1273	10.1057	6.93361	6.57568
her15.1	116.115	-1.3876	0.464111	-2.9898	0.00279158	0.0157401	4.28706	3.29756	4.93609	14.2529	9.13647	10.3871
her2	63.6493	1.48033	0.280808	5.27169	1.35171e-07	2.63333e-06	4.48416	4.33284	6.54032	2.5741	1.80563	1.34027
her4.4	23.6746	4.76656	0.792161	6.01715	1.77512e-09	4.99298e-08	1.62613	2.33896	2.46804	0.0953372	0.14445	0
her7	825.708	2.12677	0.279164	7.61834	2.56957e-14	1.4998e-12	45.0387	40.2225	50.8006	13.9192	9.2087	9.0468
hes6	5301.17	1.01896	0.27887	3.65387	0.000258314	0.00215753	194.199	187.079	210.072	124.463	85.4784	91.2638
hey1	344.305	-1.46403	0.269583	-5.43071	5.6131e-08	1.18582e-06	5.96246	6.17333	5.84104	20.8312	15.6367	14.8267
HHEX	26.5093	1.90764	0.464835	4.10391	4.06222e-05	0.000431871	3.94212	2.41565	3.33186	0.953372	0.722251	1.0052
hhip	700.537	1.61706	0.172896	9.35279	8.53668e-21	9.47828e-19	27.6934	34.701	40.2291	9.72439	13.9033	11.0153
hibadha	105.575	1.23414	0.31545	3.91231	9.14186e-05	0.000872642	3.89285	3.37424	4.48361	2.04975	1.62506	1.5078
higd1a	3675.75	2.85757	0.246594	11.5882	4.7313e-31	1.16445e-28	49.7693	40.6826	57.0941	8.29433	5.48911	7.2877
hirip3	849.172	-1.36905	0.190957	-7.16943	7.53106e-13	3.67033e-11	14.2902	22.6611	17.1529	37.7535	57.9967	49.7155
HIST4H4	9292.38	1.58739	0.555164	2.85931	0.00424564	0.0222009	926.004	236.12	620.59	251.499	155.284	206.904
hivep2a	33.3768	1.34054	0.493243	2.71781	0.0065716	0.0316926	2.85804	2.76074	3.37299	0.762697	1.69729	1.21462
hmbsb	67.3578	-1.02529	0.359307	-2.85351	0.00432387	0.022578	2.41455	3.25921	3.6198	6.19692	7.1864	6.24061
hmcn1	854.195	1.91443	0.405648	4.71942	2.36512e-06	3.45117e-05	25.0325	47.8912	34.676	9.2477	11.3032	9.0468
hmga1b	63.509	2.72478	0.325883	8.36122	6.20713e-17	4.90164e-15	5.46969	4.8313	4.19568	0.33368	0.902814	1.0052
hmga2	38.1758	-1.45534	0.479796	-3.03325	0.00241934	0.0140379	1.6754	1.53375	1.06949	4.0995	4.80297	3.2669
hnf1ba	491.191	1.20037	0.374396	3.20615	0.00134522	0.00862566	83.2281	108.513	102.136	38.7546	45.0685	48.8359
hoxa9b	20.2378	-4.06632	0.858297	-4.73766	2.16201e-06	3.19264e-05	0.344936	0.191718	0.123402	6.5306	2.16675	2.55488
hoxb1a	56.6973	1.39804	0.552599	2.52993	0.0114084	0.0489021	5.02621	8.5123	11.0651	3.19379	3.14179	3.30878
hoxb1b	2219.85	2.38859	0.377535	6.3268	2.50291e-10	8.6155e-09	142.606	159.701	183.129	29.7929	33.2958	32.9622
hoxb3a	127.297	2.33201	0.436626	5.34098	9.24465e-08	1.88558e-06	8.22918	15.9126	16.7004	3.00312	2.49177	2.88995
hoxb4a	89.4067	3.18753	0.532536	5.98557	2.15636e-09	5.96309e-08	2.90732	4.67793	5.05949	0.286011	0.397238	0.7539
hoxb5a	23.7522	2.11719	0.664651	3.18541	0.0014455	0.00913379	1.72468	1.87884	2.18011	0.381349	0.577801	0.418833
hoxb5b	60.8124	2.97939	0.621315	4.7953	1.62434e-06	2.48309e-05	6.20884	11.3497	10.9417	1.33472	2.0223	0.37695
hoxb6b	34.3555	3.0695	0.775117	3.96004	7.49357e-05	0.000738209	3.84357	6.0583	7.73321	0.810366	0.938926	0.418833
hoxc5a	53.5197	1.82937	0.597844	3.05994	0.00221378	0.0131183	2.36527	2.99081	3.29073	0.572023	1.19171	0.7539
hoxc6a	163.431	1.52059	0.510073	2.98113	0.00287189	0.0161252	8.72195	9.89267	11.3119	3.76582	3.97238	3.05748
hoxc6b	42.9711	1.83162	0.674675	2.71482	0.00663122	0.0319176	3.74502	6.25002	8.35022	1.81141	1.87785	1.63345
hoxd10a	24.7838	-1.43518	0.548442	-2.61683	0.00887499	0.0403841	1.28119	2.1089	2.46804	7.34096	4.26128	4.73282
hpcal4	71.9437	2.87574	0.571602	5.03103	4.87862e-07	8.38796e-06	1.4783	1.11197	1.19289	0.190674	0.252788	0.0837666
hs3st3b1a	63.7081	-1.86453	0.300291	-6.20906	5.33017e-10	1.71483e-08	2.85804	3.56596	4.23681	12.4892	14.2645	13.5283
hs3st3b1b	232.982	-1.11357	0.311888	-3.57043	0.000356397	0.00282928	9.70748	12.6918	11.4353	28.6965	25.4955	21.5699
hsd11b2	69.2456	1.82989	0.508138	3.60116	0.000316798	0.00257183	4.28706	2.37731	2.79712	0.810366	0.902814	1.04708
hsd17b10	775.004	1.4251	0.311597	4.57355	4.7954e-06	6.53263e-05	56.8158	32.0553	36.6505	21.8799	13.4339	13.0257
hsd20b2	935.977	1.15099	0.277908	4.14163	3.44848e-05	0.000374714	38.1893	43.7885	34.5938	14.8249	19.8619	19.8946
hspa12a	2684.26	3.13848	0.271766	11.5484	7.51698e-31	1.81972e-28	63.6653	59.356	62.2359	6.33992	8.16143	7.32958
hspb8	51.9006	2.0206	0.494358	4.08733	4.36357e-05	0.000458287	3.30153	5.06136	4.19568	1.33472	1.40839	0.460717
htr1d	295.458	1.86029	0.380096	4.89426	9.86782e-07	1.58907e-05	3.30153	5.48315	4.19568	1.23938	1.30005	1.17273
htr2a	7.27662	-7.93021	1.4978	-5.29458	1.19289e-07	2.35816e-06	0	0	0	1.90674	2.41954	1.63345
htr2b	33.3225	-1.30573	0.292499	-4.46405	8.04249e-06	0.000104087	2.11889	1.38037	1.89217	3.57514	5.59744	4.56528
hykk.2	50.6298	1.82752	0.40763	4.48327	7.35063e-06	9.61442e-05	4.04068	3.10584	5.10063	1.52539	1.04726	1.0052
iah1	61.227	1.65462	0.402355	4.11234	3.91669e-05	0.000419115	4.77982	1.41872	3.53753	1.00104	1.26394	0.921433
ier2	1396.29	2.12102	0.336652	6.30035	2.96972e-10	1.01514e-08	26.7079	27.6074	36.2391	10.1534	6.31969	4.98411
ier5	5239.45	1.79381	0.134035	13.3832	7.5862e-41	3.61372e-38	275.505	280.637	289.872	89.4739	71.864	91.2638
igf2b	14.8647	2.63296	0.681725	3.8622	0.000112372	0.00104365	1.4783	1.30368	1.27516	0.33368	0.14445	0.209417
igfbp1a	632.756	1.66441	0.383264	4.34273	1.40721e-05	0.00017075	10.4959	24.7317	15.5487	5.43422	3.50292	7.66465
igsf9a	97.7957	1.41141	0.444293	3.17675	0.00148936	0.00935091	4.43489	4.40952	5.96444	1.81141	2.27509	1.67533
igsf9bb	13.5228	-3.32035	0.785611	-4.22646	2.37401e-05	0.000269048	0.14783	0.306749	0.329073	2.86011	2.96123	2.34547
il10rb	994.508	1.90869	0.126017	15.1463	8.01581e-52	6.96291e-49	43.8561	56.5569	45.3297	14.1576	13.6144	12.5231
il12rb2l	294.417	-1.4546	0.283508	-5.13072	2.88631e-07	5.27502e-06	9.16543	10.8129	17.8111	32.3193	34.3069	40.5012
il17rd	2634.38	1.39934	0.199287	7.02174	2.19118e-12	1.00801e-10	75.0974	99.6935	71.5733	31.1753	41.3489	24.4599
il1rl1	23.3935	5.44314	0.890098	6.11521	9.64298e-10	2.90608e-08	2.02034	1.53375	1.64536	0.0476686	0.0722251	0
il20ra	110.511	-1.27598	0.233085	-5.47431	4.3921e-08	9.48219e-07	4.33633	5.82824	6.70485	11.3928	17.4062	13.654
im:7138239	822.949	3.92921	0.374657	10.4875	9.86028e-26	1.58268e-23	156.404	108.513	131.67	9.91506	7.80031	9.25621
im:7150988	1800.74	1.50424	0.464718	3.23689	0.00120838	0.00787983	89.9789	46.8943	73.0952	41.0903	17.6229	17.3816
im:7160594	1613.32	1.09537	0.188924	5.79792	6.71439e-09	1.70363e-07	275.751	277.225	305.626	148.869	125.672	141.189
inhbaa	185.489	2.38733	0.548728	4.35066	1.35731e-05	0.000165102	2.5131	2.7224	2.96165	0.429017	0.686138	0.5026
inpp5ka	51.268	-1.14258	0.374308	-3.05251	0.00226937	0.013378	1.37974	2.37731	2.55031	4.76686	5.34466	4.35587
insb	2135.16	3.07848	0.415666	7.40614	1.30025e-13	6.95683e-12	16.6555	8.09051	14.8083	1.6684	1.26394	1.92663
insm1b	35.8096	1.33279	0.445272	2.99321	0.0027606	0.0156071	1.33047	2.87578	2.09784	0.858034	1.19171	0.544483
iqca1	128.878	1.22496	0.238037	5.14607	2.66e-07	4.89352e-06	3.59719	5.59818	4.40135	2.04975	1.80563	2.21982
iqck	37.7283	-1.08604	0.387711	-2.80116	0.00509193	0.025742	1.62613	1.30368	1.6865	2.86011	3.68348	3.60197
irak3	49.6787	3.43685	0.560614	6.1305	8.76015e-10	2.67828e-08	2.85804	7.36199	4.60702	0.381349	0.613913	0.418833
irf2	37.8892	-1.35826	0.315504	-4.30504	1.66954e-05	0.000199144	1.08408	0.996935	0.740413	3.09846	2.41954	1.96852
irs2b	616.592	1.04793	0.262964	3.98508	6.74585e-05	0.000673899	8.42629	8.85739	6.99279	3.09846	5.34466	3.72762
irx3a	1822.46	5.33034	0.484183	11.0089	3.4612e-28	7.30166e-26	12.9105	15.1074	17.5642	0.476686	0.2889	0.418833
irx5a	386.179	1.75359	0.513562	3.41456	0.000638845	0.00463123	3.89285	2.95246	4.15454	1.43006	0.902814	1.04708
iscub	61.9694	2.0361	0.470183	4.33043	1.48816e-05	0.000178917	4.28706	1.61043	3.6198	0.810366	0.794476	0.795783
isg15	146.189	1.50453	0.525349	2.86386	0.00418507	0.0219698	6.25812	1.53375	1.23402	1.14405	0.577801	1.59157
isl1	323.619	1.68881	0.433414	3.89653	9.75805e-05	0.000924292	2.66093	3.29756	3.78433	1.00104	1.08338	1.04708
ism1	2240.73	3.26978	0.419801	7.78887	6.76125e-15	4.28512e-13	82.8831	100.767	100.408	7.53164	9.56982	13.4864
itfg3	39.1955	-1.29258	0.287887	-4.48988	7.12631e-06	9.33755e-05	0.985531	1.11197	0.740413	1.85907	2.45565	2.88995
itga10	267.852	-4.73096	1.24172	-3.80999	0.000138971	0.00126206	3.89285	0.383437	4.23681	70.8832	105.124	58.3435
itga2.3	130.562	-2.58108	0.617503	-4.17987	2.91672e-05	0.000324645	1.52757	3.64265	0	13.7762	9.53371	8.92115
itga3b	155.363	-2.40023	0.489253	-4.90592	9.29925e-07	1.50903e-05	4.04068	4.67793	3.24959	24.9783	22.1009	18.3868
itga4	532.167	2.40269	0.450467	5.33376	9.61987e-08	1.95133e-06	5.17404	4.17946	4.93609	0.762697	0.866701	1.17273
itga6b	244.178	-1.71203	0.246439	-6.94708	3.72919e-12	1.64385e-10	11.3336	13.6503	13.6565	51.1484	42.6489	37.1086
itgb1b.1	35.9235	-1.59	0.373029	-4.2624	2.02239e-05	0.000236458	1.13336	0.881904	0.90495	3.00312	3.43069	2.63865
itgb1bp1	182.204	1.14686	0.298647	3.8402	0.000122936	0.00113038	6.55378	3.68099	4.68928	2.62177	2.05841	2.30358
itgb5	2632.06	1.26386	0.22612	5.58933	2.27944e-08	5.18651e-07	137.087	159.855	168.773	58.9184	77.4253	64.8773
itgb7	21.2812	-3.31579	0.726132	-4.56638	4.9622e-06	6.7474e-05	0.14783	0.191718	0.370207	2.4311	2.23898	2.68053
itgbl1	8.38967	-2.29078	0.664973	-3.44492	0.000571232	0.00421365	0.640595	0.268406	0.287939	1.90674	1.84174	2.2617
itm2bb	165.442	-1.1449	0.341863	-3.34901	0.000810997	0.00565172	4.73055	5.1764	6.49918	16.398	8.48645	12.5231
itpkb	293.43	2.23631	0.293277	7.62525	2.43569e-14	1.42729e-12	7.04654	4.63958	5.05949	1.00104	1.4445	1.21462
ivns1abpa	370.27	1.20751	0.293234	4.1179	3.82339e-05	0.00041032	42.4271	82.0555	45.1241	25.5504	25.9649	24.6693
jak3	10.0229	-6.71297	1.19305	-5.62672	1.83671e-08	4.25788e-07	0	0.0383437	0.0411341	1.85907	3.50292	3.81138
jazf1a	96.4221	-1.21991	0.355737	-3.42925	0.000605253	0.00442902	3.59719	3.98774	3.53753	7.19796	10.4365	9.2981
JPH3_(1_of_2)	78.2658	3.76151	0.418194	8.99466	2.36969e-19	2.3968e-17	3.10442	5.4448	5.59423	0.429017	0.2889	0.37695
jph3	264.156	-1.59314	0.345696	-4.60851	4.05568e-06	5.63408e-05	14.1916	11.4264	8.51475	25.6934	43.3712	38.3651
kank2	443.834	3.65953	0.344672	10.6174	2.47276e-26	4.19716e-24	15.0786	16.7178	15.9189	1.00104	1.48061	1.42403
kank3	43.5617	1.29512	0.445559	2.90672	0.00365235	0.019641	1.18264	1.30368	2.34464	0.381349	1.04726	0.586366
katna1	350.584	1.15159	0.150472	7.65318	1.96071e-14	1.17222e-12	14.2902	17.6381	17.2763	7.91298	7.1864	7.91595
KCNA2_(1_of_2)	53.4518	-1.52967	0.463932	-3.29719	0.00097659	0.00658507	0.492765	0.996935	0.740413	1.95441	2.6001	2.17793
kcnab1a	32.2919	-6.57834	0.933531	-7.04673	1.83173e-12	8.55988e-11	0	0.0766873	0.0411341	4.0995	5.30854	3.09937
KCNAB2_(2_of_2)	69.4475	3.54929	0.428112	8.29057	1.12711e-16	8.71412e-15	5.27259	3.79602	5.10063	0.429017	0.252788	0.586366
kcne4	19.2417	2.42431	0.701337	3.45669	0.000546846	0.00405792	1.08408	1.68712	1.19289	0.143006	0.325013	0.293183
kcnip3b	33.7206	-2.08714	0.724771	-2.87972	0.00398022	0.0211272	1.4783	0.690186	3.29073	11.0114	5.74189	6.99451
kcnj11	27.907	2.03685	0.478824	4.25385	2.10123e-05	0.000243745	1.4783	2.41565	1.89217	0.429017	0.650026	0.37695
kcnk10a	136.181	-2.94907	0.416401	-7.08228	1.41798e-12	6.75461e-11	2.06961	4.25615	8.84383	44.2841	40.446	35.894
kcnma1a	133.796	2.15967	0.372765	5.79366	6.88708e-09	1.73849e-07	5.71608	12.0399	7.73321	2.33576	2.52788	1.04708
KCNN2	22.0067	-1.83285	0.657681	-2.78683	0.00532258	0.0266617	0.443489	0.690186	1.31629	2.33576	2.27509	4.43963
kctd15a	1462.19	-1.18504	0.447939	-2.64554	0.00815598	0.0376962	68.3958	91.7181	86.5872	178.805	205.805	196.935
kdelr3	260.172	1.42577	0.446573	3.1927	0.00140949	0.0089638	5.02621	6.9402	6.41692	2.33576	1.66118	3.09937
kidins220b	492.66	-1.05063	0.187388	-5.60671	2.06211e-08	4.72111e-07	19.2671	19.632	17.9756	35.3701	43.5156	43.4749
kif17	30.0422	2.23896	0.452417	4.94888	7.46415e-07	1.23154e-05	2.316	3.45093	2.09784	0.33368	0.794476	0.586366
kif25	26.6214	-1.60512	0.531401	-3.02054	0.00252321	0.0145548	0.788424	0.920248	1.48083	3.19379	3.71959	3.14125
kif5c	38.384	2.15165	0.420763	5.1137	3.1591e-07	5.71696e-06	1.72468	2.14725	1.39856	0.381349	0.469463	0.37695
kirrel3a	60.0715	3.52995	1.00263	3.5207	0.000430414	0.00333295	3.05514	3.48927	2.55031	0.0476686	0.43335	0.335067
kirrel3l	4741.77	2.07487	0.452429	4.58605	4.517e-06	6.23388e-05	54.6969	67.945	64.1692	17.399	16.1062	12.3556
kirrelb	31.8116	1.27516	0.489827	2.60329	0.00923329	0.0416712	1.72468	1.45706	2.30351	0.905703	0.975039	0.460717
kita	114.534	1.86683	0.425404	4.38837	1.14201e-05	0.000142193	3.3508	3.68099	5.10063	0.762697	1.66118	1.0052
kiz	608.934	1.33557	0.140655	9.49541	2.19337e-21	2.61205e-19	24.2933	27.8375	23.4053	9.53372	10.7976	10.7221
klf2a	3231.49	-1.07055	0.346612	-3.08863	0.00201085	0.0120742	108.852	108.091	100.778	246.733	210.356	234.002
klf9	199.561	1.07355	0.321294	3.34135	0.000833735	0.00577746	6.11029	5.52149	5.75877	2.90778	2.27509	3.39255
klhl17	36.2888	-1.01269	0.400916	-2.52593	0.0115392	0.0493196	1.08408	1.80215	1.9333	3.62281	3.21402	3.2669
klhl21	39.2476	-1.72895	0.393648	-4.39214	1.12241e-05	0.000140226	0.886977	0.843561	1.27516	3.19379	2.78067	4.35587
klhl24b	404.435	-1.89202	0.180239	-10.4973	8.89054e-26	1.44271e-23	18.1338	18.3283	19.5798	70.0728	69.9861	75.5156
klhl32	35.034	-2.02856	0.642192	-3.15881	0.00158414	0.00987465	1.52757	0.575155	1.27516	4.76686	4.22517	5.23541
KRT18_(2_of_3)	8.43985	-3.57032	0.75509	-4.72833	2.26371e-06	3.31958e-05	0	0.268406	0.123402	1.04871	1.62506	2.38735
krt1-c5	19.6656	-1.91185	0.726964	-2.62991	0.00854065	0.0391902	0.344936	0.651842	0.164536	1.57306	1.4445	1.54968
krt94	73.0455	-3.95176	0.604252	-6.53993	6.15478e-11	2.29514e-09	0.14783	0.306749	0.287939	4.76686	4.26128	3.0156
krt96	223.184	-3.10783	0.304805	-10.1962	2.06277e-24	3.0461e-22	4.1885	5.06136	4.77155	42.4727	29.5762	53.1499
lactbl1b	43.8148	2.69976	0.454841	5.93562	2.92732e-09	7.96092e-08	2.21744	1.99387	2.0567	0.33368	0.216675	0.460717
lamb2l	53.8152	-6.97209	0.76615	-9.10016	9.01969e-20	9.44637e-18	0.295659	0.0383437	0.0411341	15.2539	11.9894	18.8475
lamtor2	416.058	1.10947	0.361791	3.0666	0.00216512	0.0128558	20.6961	10.8513	19.4976	11.9648	6.42803	5.98931
larp6	684.934	-1.07472	0.317225	-3.38789	0.000704331	0.00502943	23.6035	20.1304	25.7911	36.1328	53.8438	62.2805
lbh	353.264	1.21334	0.206417	5.87812	4.14957e-09	1.09423e-07	44.9402	35.1995	34.1001	17.2084	13.9756	19.9365
lbx2	144.118	5.99163	0.506743	11.8238	2.94058e-32	8.04138e-30	15.5221	16.5645	20.1146	0.0953372	0.361125	0.37695
lcn15	18.3773	-1.72966	0.443113	-3.90343	9.48378e-05	0.000902364	0.542042	0.498468	0.699279	1.95441	2.09453	1.92663
lcp2b	83.0033	1.12518	0.414677	2.7134	0.00665969	0.0319921	3.69574	3.10584	4.40135	2.00208	2.09453	1.21462
ldb2a	40.7074	-1.66143	0.390619	-4.25331	2.10629e-05	0.000244141	0.689871	1.41872	1.19289	3.43214	4.0446	3.43443
LDLRAD4_(2_of_2)	75.8977	-1.22017	0.414086	-2.94666	0.00321223	0.0177063	1.82323	1.87884	2.38578	5.48189	3.03345	6.15685
lft1	1068.33	7.25553	0.416182	17.4336	4.58957e-68	1.69435e-64	51.2476	47.1627	53.8856	0.381349	0.361125	0.293183
lft2	4496.34	5.77565	0.447573	12.9044	4.25267e-38	1.69727e-35	67.5088	44.7087	61.1252	0.905703	1.11949	1.2565
lgals3l	711	-1.24999	0.322656	-3.87407	0.000107032	0.00100416	17.4932	18.4817	15.5075	49.9567	31.1651	45.4853
lhfp	1761.71	2.98065	0.302644	9.84873	6.94162e-23	9.1524e-21	10.2002	11.7715	10.8183	1.38239	1.30005	1.63345
lhx1a	1638.83	4.67113	0.620278	7.5307	5.04694e-14	2.86647e-12	10.7423	11.1197	11.4353	0.429017	0.505576	0.418833
lhx8b	41.8358	-1.40747	0.388482	-3.62299	0.000291222	0.00239181	0.886977	1.61043	1.89217	3.09846	4.26128	4.7747
limch1a	74.0572	1.47689	0.244394	6.04309	1.51194e-09	4.34374e-08	4.92765	5.32977	6.82826	1.47773	2.74455	2.09417
LIMD1	61.6137	1.00299	0.385083	2.6046	0.00919809	0.0415631	2.56238	2.454	3.29073	0.953372	1.69729	1.63345
lingo1b	101.675	-1.48382	0.450651	-3.29263	0.000992561	0.00668056	1.52757	2.03221	1.76877	8.05599	3.71959	3.60197
lmf2a	110.484	-1.13571	0.367594	-3.08959	0.00200435	0.0120582	2.56238	1.95553	2.59145	3.90882	7.22251	5.06788
lmo2	337.323	4.10702	0.425194	9.65918	4.49438e-22	5.57719e-20	11.6785	8.28223	16.3302	1.23938	0.541688	0.418833
lmo4a	4256.48	1.02854	0.190579	5.3969	6.78024e-08	1.41418e-06	298.862	332.823	327.263	178.566	149.903	157.816
loxl3b	22.6719	1.73469	0.58109	2.98524	0.00283359	0.0159526	2.56238	1.57209	3.6198	0.572023	1.11949	0.712016
lpar1	1479.92	3.36117	0.208895	16.0902	2.98874e-58	3.39498e-55	44.9895	49.0416	63.6755	5.33888	5.27243	5.2773
LPIN1_(2_of_2)	22.9325	-4.6272	0.691696	-6.68965	2.23706e-11	9.00127e-10	0.246383	0.0766873	0.20567	3.52747	5.38077	4.39775
lppr2a	52.3056	-1.23952	0.460644	-2.69085	0.00712705	0.0338518	4.33633	1.26534	2.87939	6.57826	7.1864	6.95263
lrch2	129.096	1.49122	0.430591	3.4632	0.000533791	0.00398105	4.08995	3.64265	5.01836	1.28705	1.7334	1.67533
lrfn4b	31.6176	-1.20571	0.411304	-2.93144	0.0033739	0.0183846	1.87251	1.80215	2.01557	4.29017	3.57514	5.73801
lrrc14b	28.3601	1.61085	0.530621	3.03579	0.00239909	0.0139478	2.85804	1.57209	1.89217	0.524354	1.22783	0.37695
lrrc15	173.955	1.23176	0.208099	5.91913	3.23645e-09	8.73722e-08	21.8295	25.4602	36.198	13.2995	12.0977	11.3504
lrrc17	18.6372	2.01324	0.60714	3.31593	0.000913382	0.00622998	2.80876	2.41565	3.41413	1.33472	0.505576	0.37695
LRRC2	9.96144	-1.89326	0.719669	-2.63074	0.00851999	0.0391093	0.295659	0.345093	0.822681	1.28705	2.34732	2.0104
lrrc31	57.0845	-1.54201	0.335827	-4.59167	4.39715e-06	6.07416e-05	1.33047	2.53068	2.13897	5.48189	7.07806	5.65425
lsp1	130.432	2.4819	0.453116	5.47741	4.31608e-08	9.35912e-07	8.08135	9.58592	12.3814	2.5741	1.22783	1.7591
ltb4r	128.414	2.35792	0.470968	5.00654	5.54174e-07	9.38473e-06	11.4322	2.56903	3.78433	0.810366	1.37228	1.42403
ltc4s	73.8415	4.40691	0.885766	4.97526	6.51607e-07	1.09469e-05	1.03481	3.71934	3.08506	0.190674	0.0722251	0.12565
ly75	145.154	1.08371	0.303255	3.57359	0.000352121	0.00280009	4.97693	5.48315	6.12898	2.81245	3.03345	2.2617
lzts2a	652.208	1.01635	0.332409	3.05753	0.00223169	0.0132024	25.1803	36.7332	31.7555	18.7814	17.5868	11.5179
macf1b	26.5094	-1.46401	0.500661	-2.92416	0.00345387	0.0187374	0.985531	1.53375	1.89217	4.14717	4.36962	4.10457
macrod1	164.26	1.06247	0.25358	4.18988	2.79107e-05	0.00031224	7.88424	9.50923	7.07506	3.3368	4.55018	4.2721
malrd1	20.2087	-1.71134	0.522729	-3.27387	0.00106087	0.00707901	0.542042	0.498468	0.699279	1.6684	1.51673	2.72242
malt1a	53.6574	-1.0754	0.32539	-3.30495	0.000949941	0.00642886	1.77395	2.37731	2.50918	4.67152	6.17524	3.72762
mamdc2b	110.574	1.33264	0.358099	3.72144	0.000198088	0.00171867	3.30153	3.37424	2.42691	1.14405	1.58895	1.0052
map1b	102.275	-1.9357	0.513519	-3.76947	0.000163592	0.00145792	3.3508	4.67793	6.66372	16.3027	22.7148	19.2244
MAP3K13	132.902	1.17442	0.344878	3.40531	0.000660882	0.00477458	4.63199	8.47395	4.93609	3.05079	3.61125	1.63345
map6a	14.187	-3.3879	0.769833	-4.40082	1.07844e-05	0.00013542	0.443489	0.153375	0.123402	1.90674	1.76951	4.0208
mapk11	323.846	-1.25915	0.205021	-6.14157	8.17093e-10	2.50955e-08	8.37701	11.6565	11.353	24.454	24.2315	29.2764
mapk13	78.5332	1.59789	0.26565	6.015	1.79892e-09	5.05031e-08	4.23778	3.22087	3.6198	1.52539	1.19171	1.08897
mapk15	145.686	2.69758	0.576928	4.67577	2.92849e-06	4.1823e-05	1.6754	2.454	2.09784	0.33368	0.2889	0.37695
mapk8ip1	84.4446	2.00375	0.468409	4.27778	1.88767e-05	0.000222113	2.21744	2.454	1.9333	0.572023	0.43335	0.712016
marveld1	57.3302	2.35956	0.511284	4.61497	3.93143e-06	5.50289e-05	1.77395	2.22393	2.55031	0.524354	0.505576	0.293183
mat2al	341.698	1.51408	0.356499	4.2471	2.16555e-05	0.000250225	19.957	10.7746	12.4225	5.10054	4.22517	6.36626
mblac2	29.9045	1.66052	0.418633	3.96653	7.2927e-05	0.000721308	2.316	1.227	1.19289	0.619692	0.43335	0.5026
mc5rb	25.7758	2.07879	0.504182	4.12309	3.73824e-05	0.000402352	5.32186	2.41565	4.40135	1.19171	0.577801	1.21462
mcamb	35.5725	1.73116	0.604998	2.86142	0.00421741	0.0221003	3.44936	2.1089	3.90774	1.47773	1.04726	0.418833
mcf2l2	49.5042	-1.41373	0.299004	-4.72811	2.26618e-06	3.31992e-05	1.13336	1.76381	1.64536	2.62177	5.01964	4.98411
mchr1b	176.964	7.27405	0.667618	10.8955	1.21056e-27	2.35215e-25	6.65233	12.6534	17.6054	0.0476686	0.108338	0.0837666
mcm3l	112.814	1.06375	0.34888	3.04906	0.00229558	0.0134948	5.37114	3.98774	5.38856	2.4311	2.81678	2.05228
mctp1b	44.9904	1.61374	0.462162	3.49173	0.000479901	0.00364682	2.75949	2.7224	3.70207	1.33472	0.938926	0.837666
mdka	347.306	1.95038	0.271293	7.1892	6.51732e-13	3.21877e-11	10.693	8.20555	11.6409	3.71815	2.34732	2.13605
mdm1	33.9319	-1.48438	0.436031	-3.40431	0.000663326	0.00478522	1.6754	0.766873	1.02835	2.66944	3.86404	3.47632
med28	807.672	1.04541	0.268725	3.89028	0.000100129	0.000946613	28.334	19.5936	31.7555	17.0177	9.96706	12.8582
mef2cb	22.1342	1.69589	0.426574	3.97559	7.02039e-05	0.000697176	3.05514	1.80215	1.89217	0.381349	0.758363	1.0052
MEGF6_(1_of_2)	109.21	-1.09868	0.323829	-3.39276	0.000691913	0.00496235	4.68127	2.56903	3.04392	8.199	5.23632	9.33998
megf6a	48.8591	2.69752	0.616613	4.37474	1.21578e-05	0.000150352	3.84357	4.48621	3.00279	0.476686	0.830588	0.5026
meis1a	57.4253	1.1887	0.340397	3.4921	0.000479238	0.00364413	2.26672	2.454	3.8666	1.47773	1.30005	1.13085
meis1b	941.541	1.86096	0.270178	6.88791	5.66183e-12	2.45186e-10	52.7259	73.0064	81.8157	20.5452	19.4285	19.0988
meis3	624.315	2.08914	0.223358	9.35334	8.49223e-21	9.47828e-19	28.4326	40.7977	39.2008	9.39071	8.41422	8.58608
meox1	1016.26	7.76972	0.68359	11.3661	6.17167e-30	1.44662e-27	15.5714	19.5936	25.7088	0.0476686	0.0722251	0.167533
mespaa	101.453	4.43196	0.616706	7.18651	6.64703e-13	3.27189e-11	9.95386	7.97548	11.1885	0.858034	0.541688	0
mespab	152.481	7.35242	0.554418	13.2615	3.87013e-40	1.73182e-37	29.4181	18.7117	22.8705	0.143006	0.216675	0.0837666
mespba	28.8996	5.11912	0.955078	5.3599	8.32663e-08	1.71491e-06	1.33047	1.15031	3.16732	0.0953372	0.0361125	0.0418833
mespbb	58.1028	7.02247	0.901112	7.79311	6.53783e-15	4.16139e-13	4.77982	3.02915	7.6098	0	0.108338	0
met	222.45	1.33799	0.325131	4.11523	3.86791e-05	0.000414195	7.83497	12.9602	12.7927	4.48085	5.09187	4.18833
mettl1	1118.23	1.01971	0.214611	4.75142	2.01996e-06	3.013e-05	57.3086	52.1857	59.0685	36.8001	25.7844	23.2871
mettl20	81.5171	-2.05238	0.340715	-6.02376	1.70416e-09	4.83019e-08	1.62613	1.80215	1.64536	8.96169	4.91131	7.91595
METTL4	143.118	-1.49144	0.224871	-6.63243	3.30212e-11	1.27317e-09	2.85804	3.64265	4.11341	10.6301	10.6532	9.71693
mfge8a	220.884	1.28383	0.312795	4.10437	4.05413e-05	0.000431321	13.6989	10.4678	12.8338	4.38551	5.30854	6.07308
mfsd10	269.345	-1.24976	0.335155	-3.7289	0.000192316	0.00167449	7.78569	7.20861	7.69207	16.541	19.6813	19.7689
mfsd4b	8.85642	1.74687	0.65552	2.66486	0.00770198	0.0359466	2.06961	1.227	2.09784	0.619692	0.541688	0.5026
mfsd6l	40.2792	-1.39013	0.301636	-4.60864	4.05305e-06	5.63408e-05	1.37974	0.881904	1.15175	2.66944	3.53903	2.97372
mgst2	1469.34	1.34782	0.333137	4.04585	5.21341e-05	0.000533886	92.9355	56.902	90.9474	33.7017	23.2204	40.9619
mid2	170.569	-1.4301	0.195407	-7.31855	2.50669e-13	1.29428e-11	7.39148	7.47702	8.84383	20.4975	20.9092	24.8368
mif4gdb	116.808	2.02184	0.303758	6.65607	2.81252e-11	1.09584e-09	9.6582	7.32364	14.3969	2.00208	2.92512	3.05748
mmp15a	212.892	-3.06955	0.220556	-13.9173	4.97022e-44	2.82289e-41	5.56825	4.5629	5.88217	39.9939	48.3186	51.0139
mmp23bb	38.0658	1.24387	0.438429	2.83711	0.00455244	0.0235385	1.62613	1.41872	2.67371	0.810366	1.01115	0.670133
mnx1	307.755	2.90013	0.61527	4.71359	2.4339e-06	3.52795e-05	1.6754	1.61043	2.67371	0.286011	0.2889	0.2513
mocs2	58.9037	1.62645	0.399782	4.06833	4.73517e-05	0.000491505	3.40008	1.87884	4.07227	1.23938	0.975039	0.921433
morn3	32.8562	2.68493	0.542511	4.94909	7.45629e-07	1.23154e-05	1.13336	1.15031	1.8099	0.190674	0.216675	0.2513
mpdu1a	32.579	1.32858	0.424756	3.12785	0.00176087	0.0107761	1.52757	1.15031	1.85103	0.476686	0.866701	0.5026
mpeg1.3	22.2876	-4.53806	0.621963	-7.29634	2.95692e-13	1.50568e-11	0.246383	0.383437	0.20567	4.81453	8.66701	6.86886
mpp3b	19.7835	-4.14328	1.01038	-4.10072	4.11875e-05	0.000436623	0.0492765	0.268406	0.123402	2.95545	2.45565	2.80618
mpp7b	14.3089	-1.73483	0.648838	-2.67375	0.00750076	0.0352526	0.443489	0.766873	0.781547	2.00208	2.38343	2.513
mrps34	950.086	1.02342	0.18663	5.48367	4.16597e-08	9.04689e-07	49.0794	41.7563	44.3014	29.1732	17.2979	22.2819
mrps7	804.865	1.02373	0.249789	4.09837	4.16076e-05	0.000440129	52.6766	37.6151	59.3153	34.5597	17.8396	23.4128
msgn1	1816.57	6.97412	0.407663	17.1075	1.30382e-65	2.58912e-62	469.014	433.399	523.102	6.5306	3.93627	1.21462
msh4	45.7473	4.29245	0.606667	7.07547	1.48947e-12	7.04967e-11	1.87251	2.37731	2.09784	0.238343	0	0.12565
msh6	957.028	-1.11307	0.215326	-5.16922	2.35067e-07	4.37735e-06	62.4334	53.5278	50.4715	96.0045	165.576	113.504
msrb1b	526.075	2.24454	0.271976	8.25271	1.54845e-16	1.17866e-14	30.3051	19.9771	42.5326	8.15133	5.70578	6.36626
mss51	13.1777	1.72482	0.540605	3.19055	0.00142004	0.00901151	1.37974	1.11197	1.31629	0.286011	0.361125	0.544483
mt2	121.544	2.14675	0.458717	4.6799	2.87014e-06	4.1109e-05	23.9977	11.8099	27.7244	6.14925	6.06691	2.59677
mterf3	160.093	1.97002	0.246433	7.99415	1.30469e-15	8.83776e-14	6.94799	5.25308	6.29351	1.43006	2.23898	1.17273
MTFP1	212.577	1.38312	0.229839	6.01779	1.76814e-09	4.98284e-08	8.03207	6.78683	8.35022	3.47981	2.889	2.84807
mthfd2	1573.58	1.32073	0.229335	5.75897	8.46301e-09	2.09335e-07	34.74	68.5201	44.7539	20.2115	22.137	19.0988
MTHFS	23.8709	-1.62528	0.422303	-3.84861	0.000118792	0.00109569	1.13336	1.38037	0.90495	4.67152	3.25013	3.0156
mtmr8	327.048	-3.0702	0.440595	-6.9683	3.20795e-12	1.42686e-10	4.77982	4.33284	4.77155	35.7038	46.2963	39.0771
mtrr	116.221	-1.53635	0.270521	-5.67922	1.35312e-08	3.23325e-07	3.94212	5.71321	5.05949	12.7275	16.5757	15.078
mtx3	99.0747	-1.02228	0.206616	-4.94771	7.50903e-07	1.23481e-05	3.00587	3.45093	3.82547	7.5793	6.46414	7.66465
mustn1a	59.9151	2.02355	0.394109	5.1345	2.82902e-07	5.18314e-06	4.48416	2.53068	3.94887	1.19171	0.975039	0.62825
mut	374.031	-2.18971	0.25338	-8.64201	5.52302e-18	4.85467e-16	8.32773	7.13192	7.69207	36.4188	40.6266	32.4177
myb	151.073	1.19332	0.355543	3.35634	0.00078981	0.00554068	3.54791	4.48621	3.6198	1.04871	1.76951	2.47112
mybpc1	27.9418	-1.22518	0.428408	-2.85985	0.00423844	0.0221711	0.837701	1.4954	1.85103	2.86011	4.55018	2.7643
mybpc2b	98.7128	4.38605	0.502626	8.72628	2.63176e-18	2.38424e-16	14.2902	9.20248	16.8238	0.715029	0.613913	0.670133
mybphb	14.4204	1.8014	0.610896	2.94879	0.00319021	0.0176243	1.92178	1.03528	1.11062	0.33368	0.613913	0.2513
mydgf	698.389	-1.78962	0.315547	-5.67148	1.41568e-08	3.37728e-07	9.41182	6.97855	8.88496	36.0374	25.351	28.8576
myf5	724.146	8.4786	0.628054	13.4998	1.56811e-41	7.71877e-39	34.1486	40.2609	54.2558	0.143006	0.108338	0.12565
MYH2_(8_of_8)	5.99716	-3.22932	0.753765	-4.28425	1.83355e-05	0.000216435	0.14783	0.153375	0.0822681	1.28705	1.01115	1.42403
myh7ba	10.3001	3.10724	0.956759	3.24767	0.00116354	0.00764662	1.28119	1.61043	1.11062	0.0476686	0.180563	0.2513
myl10	53.0304	2.54937	0.746724	3.41407	0.000640004	0.00463736	3.49863	1.8405	4.44248	1.14405	0.2889	0.293183
myl6	763.859	1.16678	0.247438	4.71546	2.41171e-06	3.50184e-05	105.649	71.626	99.8735	58.108	31.5985	37.5693
myo15ab	11.4005	3.20033	0.674772	4.74283	2.10756e-06	3.12159e-05	1.82323	1.91718	1.35742	0.143006	0.180563	0.2513
myo18aa	56.8179	-1.05071	0.39171	-2.68237	0.00731022	0.0344778	2.71021	2.18559	2.46804	4.71919	6.06691	5.026
myo1b	891.552	1.04604	0.211665	4.94196	7.73407e-07	1.26758e-05	45.6793	43.5201	75.8924	25.9794	29.4678	27.2242
MYO1C_(1_of_2)	79.8312	2.88735	0.379481	7.60869	2.76882e-14	1.60973e-12	23.0121	13.497	15.3019	2.86011	2.85289	1.54968
MYO1G	24.8409	-1.42154	0.473609	-3.00151	0.00268647	0.0153348	0.886977	0.72853	1.31629	3.19379	2.23898	2.68053
myo5c	47.1399	-1.60856	0.368998	-4.35926	1.30505e-05	0.000159402	1.03481	1.07362	1.31629	2.24042	4.3335	4.2721
myo6b	67.2218	1.55584	0.422913	3.67887	0.000234265	0.00198246	5.81463	2.64571	4.07227	1.62073	1.37228	1.42403
myo9ab	68.1401	1.24784	0.422049	2.95662	0.00311032	0.0172799	3.89285	3.06749	4.60702	1.43006	1.76951	1.84287
myod1	135.468	6.86083	0.676618	10.1399	3.67541e-24	5.21873e-22	13.7974	14.9157	20.8138	0.0953372	0.2889	0.0418833
MYOF_(2_of_2)	57.5953	1.45792	0.53359	2.73228	0.00628969	0.0306636	2.46383	2.26228	1.8099	0.858034	0.938926	0.670133
myom1b	30.749	1.51924	0.560929	2.70844	0.00676012	0.0323587	2.5131	1.64878	1.39856	0.524354	0.650026	0.837666
MYOM2_(1_of_2)	10.2277	-4.16453	0.895756	-4.64918	3.33259e-06	4.71382e-05	0.0492765	0.0766873	0.123402	1.04871	1.51673	2.13605
myom3	83.8105	1.51089	0.594771	2.54029	0.0110762	0.0478392	6.80016	8.85739	2.46804	1.62073	2.13064	2.88995
MYRIP_(2_of_2)	7.17037	-3.53481	1.00942	-3.50182	0.000462084	0.00353737	0.0492765	0.191718	0.123402	1.47773	1.80563	1.17273
myt1b	26.0139	-2.2459	0.404641	-5.55035	2.85103e-08	6.3501e-07	0.788424	0.805217	0.575877	3.09846	4.26128	3.30878
nab1a	43.285	1.64973	0.458302	3.59965	0.000318642	0.00258254	1.72468	3.22087	2.63258	0.619692	1.08338	0.795783
nadl1.2	66.0311	1.53578	0.414484	3.70527	0.000211163	0.00181793	1.57685	2.91412	1.85103	0.858034	0.794476	0.62825
naif1	85.3593	-1.24109	0.330066	-3.76012	0.000169834	0.00150627	2.66093	7.13192	4.31908	10.9638	12.5672	11.1828
NANS_(2_of_2)	247.652	1.247	0.367139	3.39654	0.000682438	0.00491109	11.9249	15.3758	11.8055	4.90986	5.66967	6.5338
NAPB_(2_of_2)	35.3887	1.31185	0.511577	2.56433	0.0103376	0.0455418	2.80876	2.56903	2.18011	1.09638	0.975039	1.08897
naprt	69.2472	-1.42748	0.473153	-3.01695	0.00255336	0.0146942	3.10442	4.14112	3.90774	10.7254	11.231	9.13056
NAV1_(2_of_2)	817.308	1.03384	0.322901	3.20172	0.00136609	0.00874047	42.9199	53.1827	47.8801	26.9327	28.2039	17.6748
ncam3	39.906	-1.03917	0.354036	-2.93521	0.00333318	0.0182098	1.72468	1.57209	1.56309	2.90778	2.92512	4.5234
nceh1a	133.321	-2.85265	0.313659	-9.09477	9.47849e-20	9.85697e-18	3.05514	2.95246	3.08506	25.2643	19.7174	22.9521
NCOA7_(1_of_2)	16.041	1.80539	0.496281	3.63784	0.000274936	0.00227705	4.92765	2.95246	4.07227	1.38239	1.4445	0.712016
ncs1a	147.158	-1.59376	0.405127	-3.93398	8.35502e-05	0.000807451	10.693	9.08745	11.7643	36.4188	29.2512	32.7528
ndnf	570.892	2.10023	0.305951	6.86461	6.66732e-12	2.84556e-10	13.2061	17.7531	21.1018	5.67256	3.90015	2.97372
ndor1	419.787	-1.33682	0.170959	-7.81953	5.30193e-15	3.40407e-13	13.4032	14.9157	15.5487	37.0862	38.5682	39.2447
ndr2	1036.78	4.4795	0.360091	12.4399	1.58621e-35	5.32352e-33	21.2875	24.0031	20.9372	0.715029	1.30005	1.04708
ndrg1b	196.144	6.92571	1.12024	6.18232	6.31647e-10	2.00162e-08	4.1885	2.87578	2.55031	0	0.0361125	0.0418833
ndrg2	23.388	1.30288	0.479741	2.71579	0.00661169	0.031834	1.77395	3.68099	1.64536	0.66736	0.866701	1.46592
ndrg3b	1517.89	1.51948	0.340615	4.46098	8.15849e-06	0.000105496	79.2367	54.7164	71.8201	21.9275	15.3117	37.1924
necap1	424.249	1.35312	0.279576	4.83991	1.29898e-06	2.03414e-05	18.2323	13.0368	14.8494	6.95961	6.42803	5.31918
nek8	60.2937	1.16698	0.33178	3.51732	0.000435922	0.00336853	1.97106	1.91718	2.55031	0.715029	1.22783	1.0052
nell2b	33.9869	-3.09757	0.416728	-7.43307	1.06109e-13	5.71868e-12	1.33047	0.920248	0.699279	9.15237	8.6309	8.25101
NFASC_(1_of_2)	9.15604	-5.17682	1.16197	-4.45521	8.38099e-06	0.000108089	0.0492765	0	0.123402	2.04975	2.92512	1.42403
nfatc4	78.4823	3.02144	1.18385	2.55221	0.0107041	0.0466687	34.8385	0.690186	1.64536	1.14405	1.58895	2.09417
nfe2l2a	84.1448	-1.03438	0.322144	-3.21093	0.00132308	0.00851697	3.64646	4.8313	3.66093	7.48397	11.6282	6.74321
nfil3-6	17.2862	1.9204	0.677601	2.83411	0.00459536	0.023694	1.4783	1.11197	1.48083	0.286011	0.650026	0.167533
nid1a	47.8725	2.66688	0.419687	6.35445	2.09167e-10	7.33675e-09	9.46109	4.48621	9.91331	2.04975	0.722251	1.13085
nid2a	2277.17	1.49951	0.399722	3.75139	0.000175855	0.00155407	203.069	288.574	204.025	87.7102	98.4428	69.0237
nid2b	144.618	1.75652	0.60749	2.89144	0.00383486	0.0204956	5.02621	8.66567	10.6537	2.33576	2.85289	2.2617
nkx1.2la	1255.77	2.00612	0.656718	3.05476	0.00225243	0.0132897	18.2323	18.9034	17.9345	6.95961	3.64737	3.5182
nkx2.1	90.7821	7.74417	1.24088	6.24089	4.35083e-10	1.43093e-08	4.63199	4.98468	7.03393	0	0.0722251	0
nkx2.2a	173.153	7.55593	1.2342	6.12212	9.23412e-10	2.80577e-08	1.42902	1.26534	1.48083	0	0	0
nkx2.4a	34.6352	1.76103	0.414575	4.24778	2.15897e-05	0.00024966	1.08408	1.8405	2.34464	0.66736	0.577801	0.37695
nkx2.9	188.66	5.69466	0.675161	8.43452	3.32558e-17	2.7132e-15	9.31326	7.09358	10.9828	0.238343	0.108338	0.209417
nkx6.1	316.814	2.22885	0.39035	5.70989	1.13047e-08	2.74117e-07	5.12476	6.36505	9.95445	1.38239	1.58895	1.7591
nkx6.2	393.566	1.8869	0.399153	4.72726	2.27568e-06	3.33052e-05	18.8236	22.8145	22.089	7.62697	5.52522	4.64905
nlrc3l	587.442	-1.2754	0.207167	-6.15638	7.44268e-10	2.3236e-08	25.8702	20.7056	17.1529	39.3742	66.736	54.6158
nme4	462.99	2.82885	0.334133	8.46622	2.53494e-17	2.09126e-15	12.2206	10.8896	9.37857	1.47773	1.55284	1.71722
nmnat1	190.996	-1.0736	0.242283	-4.43119	9.37143e-06	0.000119403	6.75088	7.05524	9.21403	20.6405	13.8672	15.5387
nmt1b	119.449	6.00337	0.94746	6.33627	2.35392e-10	8.14376e-09	3.20297	1.91718	2.67371	0.0953372	0	0.0418833
NOCT_(2_of_2)	52.8625	2.03117	0.290096	7.00171	2.52865e-12	1.14894e-10	4.28706	3.10584	5.18289	0.810366	0.866701	1.5078
nod2	9.24496	-2.94624	0.699623	-4.21118	2.54041e-05	0.000285932	0.0492765	0.268406	0.287939	1.33472	2.0223	1.59157
nog1	2441.02	3.69652	0.475092	7.78064	7.21606e-15	4.55383e-13	7.68714	8.7807	11.6821	1.23938	0.722251	0.293183
nog3	48.8444	4.6719	0.777958	6.00534	1.90934e-09	5.30984e-08	1.97106	1.57209	1.43969	0	0.14445	0.0418833
notch1b	243.66	1.39073	0.436105	3.18898	0.00142775	0.00903712	14.1424	12.7301	12.5048	7.00728	5.16409	3.35067
notch2	646.978	1.5169	0.25907	5.85517	4.76525e-09	1.24546e-07	70.0712	89.4558	80.1703	21.9752	34.9931	30.1141
noto	22459.1	4.05176	0.345037	11.743	7.67487e-32	1.98833e-29	74.9003	54.333	77.003	4.90986	4.15294	3.81138
npffr2b	16.4297	-3.06083	0.486685	-6.28915	3.19211e-10	1.08115e-08	0.837701	0.268406	0.452475	4.33784	4.29739	4.60717
npl	212.331	1.17083	0.283237	4.13374	3.56911e-05	0.000386401	20.4005	17.4464	27.1074	13.0612	7.69197	9.00491
npr3	241.176	1.13814	0.288168	3.94958	7.82889e-05	0.000765117	12.3684	12.4617	13.3274	3.00312	7.1864	7.83218
nr2e1	16.8035	-2.02712	0.667971	-3.03474	0.0024074	0.0139851	0.394212	0.690186	0.452475	2.38343	2.67233	1.46592
nr2f1a	39.1278	6.6971	0.841821	7.9555	1.78415e-15	1.19215e-13	3.9914	5.4448	6.95166	0.0476686	0.108338	0
nr2f5	601.865	-1.97142	0.435743	-4.52426	6.0606e-06	8.04828e-05	22.6672	27.109	28.9995	125.893	99.0206	94.0281
nrg2b	16.3396	-2.84898	0.573642	-4.96647	6.81836e-07	1.13642e-05	0.0985531	0.498468	0.946084	3.24146	4.58629	3.81138
nrip1a	1129.03	3.79361	0.362605	10.4621	1.28958e-25	2.04766e-23	31.2906	43.5968	43.1085	1.95441	3.14179	3.72762
nrp1b	24.0307	2.4555	0.399821	6.14151	8.17426e-10	2.50955e-08	2.80876	2.30062	2.96165	0.286011	0.397238	0.837666
nrp2a	177.37	3.62822	0.367473	9.87343	5.42779e-23	7.22092e-21	10.1017	8.66567	10.736	0.66736	1.1556	0.62825
nrxn2b	17.9996	3.35649	0.583285	5.75446	8.69181e-09	2.14635e-07	1.23191	2.37731	3.29073	0.143006	0.216675	0.335067
nrxn3a	62.1473	1.42812	0.536391	2.66246	0.00775719	0.0361586	6.45523	3.10584	2.46804	0.905703	1.95008	1.80098
nsun6	47.522	-1.39072	0.33179	-4.19158	2.77022e-05	0.000310143	1.72468	1.53375	1.39856	3.47981	5.30854	3.85327
ntd5	7434.78	5.26494	0.469693	11.2093	3.66982e-29	8.0884e-27	48.833	40.721	47.7567	1.28705	1.11949	1.29838
ntmt1	1425.04	1.15802	0.257111	4.50397	6.66969e-06	8.78754e-05	74.0133	58.5508	88.9319	30.7462	29.4317	42.6372
ntn1a	601.56	1.7313	0.350461	4.94007	7.8096e-07	1.27712e-05	9.21471	10.6595	17.2352	4.19484	3.53903	3.81138
ntn2	20.0587	1.17054	0.450227	2.5999	0.00932507	0.0420211	3.64646	3.79602	3.20846	1.14405	1.84174	1.92663
ntpcr	293.081	-1.00952	0.207549	-4.86402	1.15027e-06	1.82449e-05	8.67267	11.6565	12.9572	23.9773	17.8757	27.5592
ntrk2a	110.661	2.38149	0.384496	6.19378	5.8737e-10	1.86933e-08	39.914	24.1949	26.079	4.57618	6.03079	7.41335
nuak1a	64.9223	-1.11447	0.361453	-3.08331	0.00204715	0.012239	2.5131	3.64265	4.36021	11.0591	6.06691	6.36626
nudt13	105.075	-1.11445	0.235619	-4.72989	2.24644e-06	3.29754e-05	2.46383	3.10584	2.38578	6.91194	5.85023	5.15165
nudt15	140.528	2.03738	0.551771	3.69244	0.000222109	0.00189808	4.28706	5.78989	0.575877	0.905703	1.04726	0.7539
nudt2	262.745	-1.01545	0.274107	-3.70456	0.000211759	0.00182017	6.3074	4.17946	5.34743	14.0146	9.13647	9.88446
NWD2	85.1269	-2.68526	0.420348	-6.38818	1.67875e-10	5.94487e-09	2.80876	3.02915	1.39856	16.1596	18.7063	13.5283
nxph2b	37.7929	2.12962	0.721065	2.95343	0.00314261	0.01742	5.96246	4.94633	12.0523	1.81141	1.84174	1.7591
OAF_(2_of_2)	103.076	-1.129	0.224504	-5.02888	4.93349e-07	8.44181e-06	2.90732	4.71627	4.48361	7.29329	10.0754	10.2195
ogfod2	13.7053	-1.87008	0.51258	-3.64837	0.000263911	0.00219683	0.443489	0.575155	0.534743	2.04975	1.80563	2.05228
OGN_(1_of_2)	23.5387	-1.15335	0.394167	-2.92604	0.00343309	0.018655	0.788424	0.613499	0.534743	1.43006	1.66118	1.34027
olah	28.6777	-1.42503	0.538897	-2.64435	0.00818471	0.0377938	0.788424	0.575155	1.27516	2.62177	2.6001	2.09417
OLFML1	50.3271	-1.05779	0.390545	-2.70849	0.00675909	0.0323587	1.52757	1.53375	1.11062	4.38551	2.09453	2.513
olig3	163.639	-1.51558	0.367376	-4.12543	3.70041e-05	0.000398861	3.49863	5.94327	9.50197	28.1721	14.1561	13.2351
OMA1	34.1221	-1.43451	0.382636	-3.74901	0.000177532	0.00156608	1.37974	1.15031	1.06949	3.09846	3.57514	3.39255
ophn1	74.7627	-1.27453	0.287068	-4.43982	9.00356e-06	0.000115213	3.79429	3.41259	2.13897	7.15029	7.80031	8.50231
osgepl1	46.175	-1.91469	0.367383	-5.21171	1.87104e-07	3.55593e-06	0.591318	0.651842	0.329073	2.04975	1.84174	2.2617
osr1	2060.36	4.65317	0.33372	13.9433	3.45459e-44	2.04056e-41	27.792	29.2562	27.4364	1.62073	0.722251	1.17273
otc	10.2859	-3.40856	1.02311	-3.33157	0.000863561	0.00595063	0.14783	0.115031	0.0822681	1.52539	1.1556	1.08897
otud6b	1012.92	1.00004	0.131019	7.63281	2.29692e-14	1.35961e-12	40.3082	33.8575	39.3242	21.1172	16.7201	20.9835
otulina	249.001	2.14025	0.215304	9.94057	2.77229e-23	3.72168e-21	17.9859	15.6059	18.3047	4.81453	3.39458	4.0208
p2rx7	126.167	1.83456	0.383754	4.78056	1.74809e-06	2.63948e-05	3.79429	5.25308	7.98001	2.00208	1.22783	1.71722
p2ry11	87.1862	-1.32801	0.423288	-3.13737	0.00170469	0.0105063	1.62613	0.805217	1.02835	4.05183	1.98619	2.88995
P2RY6	11.6128	1.58682	0.526403	3.01445	0.00257444	0.0147867	1.37974	2.18559	1.27516	0.572023	0.722251	0.37695
p3h2	48.3875	1.28209	0.405663	3.16047	0.00157513	0.00982262	4.33633	2.30062	5.4297	2.24042	1.30005	1.59157
p4ha2	8789.96	2.96288	0.35252	8.40486	4.28355e-17	3.43778e-15	54.0564	64.3023	69.9279	9.62905	10.1476	5.19353
pabpn1l	61.9507	1.28593	0.453448	2.83589	0.00456988	0.0235956	4.13923	1.57209	3.00279	1.52539	1.37228	0.795783
panx2	13.5364	-2.32274	0.628178	-3.69758	0.000217665	0.00186658	0.246383	0.230062	0.411341	1.04871	2.09453	1.46592
pappa2	38.2678	4.22958	0.931828	4.53901	5.65183e-06	7.58043e-05	6.15957	4.25615	6.29351	0.143006	0.361125	0.418833
papss2b	2495.2	1.20272	0.355703	3.38124	0.000721597	0.00514029	94.808	98.3515	98.0636	32.653	49.7992	49.171
pax2a	118.661	-2.64618	0.555578	-4.76293	1.90803e-06	2.86923e-05	2.95659	3.3359	5.01836	30.4126	20.0063	22.4913
pax6b	777.073	-1.45975	0.397736	-3.67015	0.000242409	0.00203969	40.1604	48.6581	48.4971	113.642	133.472	144.749
pax7b	43.3809	-1.90886	0.481022	-3.96835	7.23729e-05	0.000716308	1.37974	1.30368	1.23402	4.29017	4.94742	6.0312
pax8	90.7192	3.91998	0.637957	6.14458	8.01742e-10	2.47685e-08	15.325	21.0507	22.5826	0.715029	1.4445	1.88475
pbx1b	54.4026	-2.01984	0.444788	-4.54113	5.59547e-06	7.51166e-05	1.92178	2.76074	1.97444	7.29329	10.4365	10.3871
pbxip1b	49.0412	1.06067	0.304054	3.48842	0.000485882	0.00368706	1.97106	1.57209	1.19289	0.572023	0.866701	0.87955
pcbp4	69.0594	-1.60609	0.252988	-6.34849	2.17443e-10	7.60896e-09	1.62613	2.454	2.38578	6.48293	6.46414	7.58088
pcdh10b	2205.78	3.22196	0.414165	7.77941	7.28628e-15	4.57858e-13	108.556	126.994	118.466	19.3534	11.0504	8.66985
pcdh20	164.892	1.33483	0.361518	3.69229	0.000222241	0.00189811	4.73055	8.89573	7.81547	2.38343	4.08072	2.34547
pcdh8	1479.95	6.53662	0.699125	9.34972	8.78794e-21	9.68444e-19	100.376	137.692	121.387	1.85907	1.55284	0.586366
PCMTD2_(2_of_2)	167.991	-1.01406	0.198968	-5.09662	3.45778e-07	6.17595e-06	4.13923	4.48621	4.93609	8.91402	9.4976	10.0101
pcolce2a	361.611	2.20528	0.396587	5.56066	2.68755e-08	6.02231e-07	2.71021	2.7224	3.53753	0.858034	0.505576	0.670133
pcsk5a	111.845	8.44327	0.64928	13.0041	1.16024e-38	4.75922e-36	25.6238	37.2317	48.2503	0.0476686	0.0722251	0.209417
pdcd2l	227.929	1.66783	0.251418	6.6337	3.27376e-11	1.26554e-09	15.9656	14.8773	20.4025	6.43526	4.15294	6.11496
pde10a	200.071	3.87997	0.294713	13.1652	1.39125e-39	6.04252e-37	15.1279	13.3436	14.6849	1.14405	0.866701	1.04708
pde11al	306.043	6.41376	0.395231	16.2279	3.20463e-59	4.30207e-56	79.3352	118.214	80.9519	1.19171	0.866701	1.34027
PDE1C	61.1061	1.53562	0.391474	3.92265	8.75807e-05	0.000841447	5.61752	4.33284	3.99001	1.23938	1.69729	2.05228
pde4cb	43.2039	2.73537	0.515065	5.31072	1.0919e-07	2.18188e-06	2.95659	1.91718	2.87939	0.476686	0.397238	0.335067
pdgfra	192.969	3.22019	0.401764	8.01512	1.10025e-15	7.55696e-14	32.1776	37.7302	36.0334	4.05183	4.3335	3.39255
pdk4	34.7417	-1.72262	0.411724	-4.18391	2.8654e-05	0.000319601	0.443489	0.613499	1.64536	3.57514	3.21402	2.47112
pdx1	35.8323	-3.06853	0.314891	-9.74472	1.94314e-22	2.50311e-20	0.591318	0.920248	1.23402	7.10262	9.24481	7.74841
pdzd2	572.647	1.26933	0.227224	5.58626	2.32007e-08	5.27085e-07	39.027	43.2133	38.2958	19.1151	17.6951	14.9942
pebp1	161.292	1.21935	0.206118	5.91579	3.30296e-09	8.88429e-08	12.2699	13.2669	11.8055	5.62489	4.87519	6.15685
pef1	1042.49	1.32131	0.198122	6.66917	2.57253e-11	1.01788e-09	35.8733	34.2792	42.6972	17.685	13.0366	15.9994
pemt	50.7288	-1.09012	0.393929	-2.76731	0.00565211	0.0280648	2.26672	1.87884	3.04392	4.33784	6.78916	4.73282
PGS1	287.96	-1.29593	0.13673	-9.478	2.59209e-21	3.0622e-19	11.6785	9.81598	12.1346	28.4581	28.4206	28.5644
phb2b	317.811	1.87849	0.343081	5.47534	4.36674e-08	9.44124e-07	29.5166	14.4939	17.8933	6.6736	4.80297	5.98931
phgdh	2581.57	1.25967	0.274154	4.59476	4.33247e-06	5.99602e-05	71.6481	92.1398	71.4499	37.5152	44.8157	19.5176
phkg2	544.419	1.59659	0.23297	6.85319	7.22228e-12	3.07353e-10	25.131	28.1059	31.3853	9.39071	8.9198	10.6802
phlda2	44.4838	1.37804	0.431153	3.19616	0.0013927	0.00886463	1.72468	0.920248	2.22124	1.04871	0.686138	0.209417
phox2a	137.417	-1.43757	0.338771	-4.24347	2.20089e-05	0.000253039	5.76535	4.8313	5.92331	13.9192	14.3728	18.0936
phyhd1	101.829	1.14109	0.344598	3.31138	0.000928373	0.00631473	5.07548	2.41565	4.40135	1.57306	1.98619	2.0104
pigh	108.975	-1.12491	0.402848	-2.79239	0.00523195	0.0263058	4.48416	4.98468	4.40135	8.91402	11.881	10.6384
pik3r6	18.8516	3.36344	0.796681	4.22181	2.42344e-05	0.000274229	1.77395	1.41872	1.8099	0.0476686	0.397238	0.0418833
pikfyve	193.905	-1.03637	0.157619	-6.57516	4.86019e-11	1.845e-09	17.0004	19.2869	15.7543	37.0385	36.4376	37.2762
pipox	42.7149	1.53141	0.38992	3.92749	8.58378e-05	0.000826315	2.316	1.45706	2.92052	0.524354	1.01115	0.837666
pir	48.4712	-1.18185	0.382835	-3.08711	0.00202114	0.0121258	1.18264	0.881904	1.43969	2.66944	2.49177	3.05748
pitx1	236.827	1.63859	0.489006	3.35087	0.000805581	0.00562193	1.37974	1.07362	1.6865	0.286011	0.613913	0.460717
pitx2	2237.83	5.23718	0.433752	12.0741	1.44679e-33	4.27295e-31	13.3539	14.6473	15.6721	0.381349	0.361125	0.460717
piwil1	210.271	1.02458	0.341792	2.99767	0.00272055	0.0154339	13.7482	9.08745	8.35022	4.62385	5.23632	6.07308
PKD1L1	193.695	5.91967	0.48934	12.0973	1.09208e-33	3.29117e-31	8.52484	12.6151	14.8083	0.190674	0.2889	0.12565
pkdcca	1938.18	-1.09284	0.236929	-4.61252	3.97812e-06	5.55771e-05	77.2656	94.0187	106.825	172.989	214.653	227.552
pkz	25.1476	4.59297	0.563063	8.15712	3.43111e-16	2.52076e-14	8.62339	4.17946	9.5431	0.33368	0.252788	0.37695
pla2g4f.2	28.6705	-1.56379	0.559424	-2.79535	0.00518433	0.0261108	0.344936	0.536811	0.863816	1.57306	1.66118	2.13605
plcg2	435.323	-1.05362	0.235426	-4.47539	7.62724e-06	9.94829e-05	14.8815	23.5047	18.5103	32.1763	46.838	43.81
plch2a	30.1309	-2.61965	0.400659	-6.53835	6.22005e-11	2.31364e-09	0.542042	1.03528	0.617011	4.43318	5.63356	4.06268
pld2	130.293	1.38401	0.29332	4.71841	2.37693e-06	3.46497e-05	8.47556	10.5829	14.7671	4.52852	4.73074	4.14645
plekha7b	32.0575	-1.13766	0.274529	-4.14404	3.41238e-05	0.000371065	1.37974	1.53375	1.52196	2.81245	3.79182	3.5182
plekhg2	100.199	1.5218	0.278849	5.45742	4.831e-08	1.0339e-06	5.56825	4.75462	5.14176	2.38343	1.58895	1.63345
plekhh2	42.9287	-1.22251	0.352349	-3.4696	0.00052124	0.0039052	1.18264	1.30368	1.89217	3.38447	4.15294	3.05748
plekho2	175.662	-1.06322	0.279708	-3.80118	0.000144011	0.00130147	6.60305	6.01996	10.7771	12.3938	19.7174	18.5962
plk2b	58.9065	2.9052	0.427358	6.79805	1.06043e-11	4.43607e-10	3.40008	3.45093	3.37299	0.66736	0.505576	0.2513
plod1a	3842.03	1.38525	0.506686	2.73393	0.00625828	0.0305508	44.7924	47.1627	59.521	19.8778	23.3287	16.8371
plod2	2013.98	5.49817	0.640805	8.5801	9.47884e-18	8.13802e-16	18.2816	21.8559	28.8761	0.572023	0.505576	0.5026
plp2	570.202	1.78518	0.33703	5.29681	1.17841e-07	2.33265e-06	24.5397	28.1826	31.3442	7.53164	8.95591	8.7955
PLPP1_(2_of_2)	973.505	-1.35014	0.177701	-7.59782	3.01157e-14	1.73718e-12	19.8584	25.2301	18.716	44.4748	65.7248	59.0974
pls1	25.2095	-1.19409	0.457115	-2.61223	0.0089953	0.040784	1.03481	1.07362	0.863816	2.09742	2.23898	2.72242
pltp	905.159	2.58599	0.314023	8.23501	1.79537e-16	1.3596e-14	17.0497	13.2669	15.8778	2.52643	2.27509	3.18313
plxdc2	1383.22	-1.40665	0.362408	-3.88139	0.000103859	0.000977497	92.3935	94.2871	100.82	266.706	260.155	262.608
plxnb1a	115.696	1.36389	0.537373	2.53808	0.0111464	0.0480019	3.9914	5.78989	5.6765	1.6684	2.38343	2.17793
PLXNB2_(3_of_5)	54.4769	3.76336	0.455259	8.2664	1.38061e-16	1.05634e-14	2.75949	2.53068	2.71485	0.0953372	0.397238	0.0837666
PLXNB2_(4_of_5)	6.10555	-4.6888	0.93204	-5.03068	4.88731e-07	8.38796e-06	0	0.153375	0.0411341	1.71607	1.62506	2.17793
PLXND1	51.4277	-2.2587	0.610986	-3.69682	0.000218316	0.00187108	1.18264	0.805217	3.94887	10.1534	9.67816	9.38186
podxl	101.687	-1.12613	0.304659	-3.69636	0.000218715	0.00187233	4.87838	4.14112	5.96444	12.5368	11.3032	9.96823
polh	197.228	-4.8617	0.254918	-19.0716	4.34456e-81	2.13854e-77	0.837701	1.4954	1.27516	31.6519	38.7849	39.7892
polm	76.1653	2.03479	0.263598	7.71932	1.16956e-14	7.16635e-13	8.62339	10.3144	9.33743	1.43006	2.85289	2.84807
postnb	72.6074	-3.65148	1.00574	-3.63063	0.000282727	0.00233111	2.80876	0.42178	0.493609	17.7327	20.1147	10.8897
pou3f1	49.8494	-1.41191	0.437221	-3.22928	0.00124101	0.00806525	4.13923	1.61043	3.04392	4.48085	8.48645	11.3504
ppapdc3	30.3468	-1.40668	0.422562	-3.32893	0.000871802	0.00599343	0.542042	0.690186	1.19289	2.00208	1.84174	2.84807
ppargc1a	21.3917	2.06007	0.545051	3.77958	0.000157091	0.00140677	3.64646	2.7224	2.59145	0.524354	1.19171	0.5026
ppdpfa	352.058	1.72811	0.374623	4.61292	3.97057e-06	5.55241e-05	12.467	7.17027	11.2296	3.81349	2.81678	3.0156
ppm1h	56.4833	-1.62294	0.526386	-3.08318	0.002048	0.0122391	1.6754	1.95553	0.90495	4.81453	3.7557	5.94743
ppp1r14c	3038.56	2.57228	0.348	7.3916	1.45067e-13	7.67816e-12	54.4013	70.3223	56.3537	9.62905	13.145	8.83738
ppp1r3ab	37.8034	2.03564	0.583007	3.49163	0.000480085	0.00364682	4.53344	4.52455	2.63258	1.85907	0.722251	0.37695
ppp1r9bb	58.7713	-1.10078	0.279272	-3.94163	8.09311e-05	0.000785739	2.85804	3.18252	3.24959	7.00728	8.12532	5.5286
PPP2R5C	325.373	1.03563	0.245736	4.21439	2.50453e-05	0.000282756	17.0497	16.6795	18.8805	8.15133	9.28092	9.17245
prdm10	747.776	-1.06057	0.190436	-5.56919	2.55922e-08	5.76097e-07	22.0759	30.4065	27.313	51.0054	63.2331	58.5529
prdm12b	53.9263	-1.79345	0.52156	-3.43863	0.000584672	0.00429118	2.02034	1.41872	1.9333	4.0995	6.75305	8.50231
prdm14	1119.2	-1.53675	0.322859	-4.7598	1.93784e-06	2.90224e-05	35.8733	44.0185	42.5326	89.2832	130.583	149.482
prdm5	75.2959	1.82358	0.542618	3.36071	0.00077743	0.00547202	1.6754	1.26534	1.60423	0.286011	0.252788	0.795783
prdx1	165.034	1.45441	0.466976	3.11453	0.00184237	0.0111914	17.0497	5.4448	5.92331	5.29121	3.32235	2.13605
prex1	951.179	1.97257	0.218112	9.04384	1.51261e-19	1.55116e-17	60.5609	68.6735	67.8712	18.6861	16.6479	16.6696
prg4a	92.8078	1.27318	0.32198	3.95421	7.67893e-05	0.000752454	2.85804	3.68099	3.53753	1.28705	1.40839	1.63345
prickle1b	3721.28	1.2656	0.243991	5.18708	2.13618e-07	4.01846e-06	110.232	143.099	136.812	48.6696	65.2554	54.4902
PRKAR2B	65.9016	2.0021	0.589732	3.39493	0.000686462	0.00493044	2.71021	1.07362	2.18011	0.429017	0.686138	0.418833
prkcg	38.8396	2.50372	0.667151	3.75285	0.000174836	0.00154692	1.23191	1.03528	1.15175	0.238343	0.180563	0.209417
prkcq	542.099	7.52172	0.537438	13.9955	1.66031e-44	1.02157e-41	27.0035	30.4832	15.6309	0.0953372	0.0722251	0.2513
PRKD2	176.607	1.25045	0.22835	5.47604	4.34957e-08	9.41789e-07	10.0524	9.81598	10.8594	4.52852	5.81412	3.0156
prph2b	35.1648	4.59796	0.92621	4.96428	6.89576e-07	1.14673e-05	1.13336	2.53068	3.7432	0.0476686	0.216675	0.0418833
prr18	334.274	1.47342	0.487174	3.02442	0.00249113	0.014381	27.2992	22.7761	23.7344	10.4871	10.2198	6.82698
PRRT4_(1_of_2)	46.1003	2.31148	0.74822	3.0893	0.00200625	0.0120582	9.26399	6.6718	11.2296	2.04975	3.32235	0.293183
prtfdc1	2802.82	1.19796	0.263711	4.54269	5.55418e-06	7.46302e-05	141.719	89.6092	85.6411	60.3008	37.7015	45.0246
PSKH2	520.935	2.88513	0.520797	5.53983	3.02761e-08	6.72311e-07	2.71021	4.60124	5.22403	0.33368	0.541688	0.87955
pstpip2	51.878	1.57634	0.383796	4.10724	4.00421e-05	0.000426918	7.29293	7.13192	9.58424	2.38343	3.64737	2.30358
ptger4a	9.9725	-3.90113	0.741658	-5.26002	1.44041e-07	2.79141e-06	0.295659	0.0383437	0.0411341	1.38239	2.70844	1.38215
ptges	39.796	-2.18833	0.31672	-6.90935	4.86877e-12	2.11462e-10	1.03481	1.30368	1.72763	8.10366	6.35581	4.7747
ptgis	65.0701	1.16988	0.428108	2.73268	0.00628216	0.0306369	2.75949	2.454	2.01557	1.33472	0.794476	1.21462
ptgs1	55.7269	-1.91106	0.4773	-4.0039	6.23064e-05	0.000628898	2.85804	3.22087	3.04392	14.6343	9.96706	10.8478
ptk2ba	176.125	4.25218	0.485944	8.75036	2.12682e-18	1.96292e-16	4.23778	3.68099	8.80269	0.286011	0.325013	0.293183
ptprb	215.929	1.83813	0.323172	5.68777	1.28708e-08	3.08544e-07	6.06101	15.9893	19.8678	3.95649	3.71959	4.43963
ptprdb	60.2538	-2.38588	0.297826	-8.01097	1.13805e-15	7.78033e-14	2.61166	2.53068	2.18011	15.1109	12.6394	11.853
ptprn2	103.874	-1.24612	0.482244	-2.584	0.00976604	0.0433991	6.20884	7.47702	8.22681	20.8788	15.4562	17.3397
ptprz1b	112.464	1.1485	0.368499	3.11671	0.00182882	0.0111137	5.46969	3.18252	4.89495	1.33472	2.3112	2.68053
pvalb9	88.7986	2.01282	0.495894	4.05898	4.92883e-05	0.00051005	17.5424	17.3313	34.3881	8.77102	3.4668	5.36106
pygl	318.153	1.01895	0.276782	3.68142	0.000231938	0.00196614	13.009	13.4203	11.2707	6.5306	6.57248	6.19873
qpct	42.4439	-1.69796	0.602928	-2.81619	0.00485976	0.0247975	1.37974	3.83437	4.31908	12.1078	11.9894	7.83218
qtrtd1	509.653	1.35544	0.140727	9.63176	5.87171e-22	7.10717e-20	19.415	23.5814	18.716	8.67568	7.65586	8.75361
quo	212.019	-2.23753	0.456181	-4.90491	9.34698e-07	1.51511e-05	1.57685	1.72547	1.19289	7.19796	7.43918	7.37146
RAB11FIP5_(1_of_2)	9.24066	3.21492	0.639034	5.03091	4.88157e-07	8.38796e-06	1.77395	2.26228	2.30351	0.238343	0.180563	0.293183
rab32a	200.411	1.5596	0.356061	4.38016	1.18592e-05	0.000146917	14.1424	9.93101	20.4436	6.24458	4.98353	4.35587
rab33a	162.908	1.27531	0.334063	3.81757	0.000134775	0.00122777	3.64646	3.87271	3.29073	1.57306	0.866701	2.21982
rab3db	211.08	1.46331	0.353448	4.1401	3.47151e-05	0.00037694	12.8612	6.74849	7.73321	4.05183	2.38343	3.85327
rac1l	16.0548	-1.41957	0.50669	-2.80165	0.00508419	0.0257117	0.394212	0.72853	1.02835	1.57306	1.91396	2.513
RANBP2_(1_of_2)	21.4231	-2.29472	0.663249	-3.45981	0.000540553	0.00402539	0.443489	0.42178	1.02835	2.4311	3.93627	3.2669
rapgef4	167.433	4.5942	0.393662	11.6704	1.80496e-31	4.59548e-29	13.5018	17.0629	16.1246	0.66736	0.469463	0.87955
raph1a	177.301	1.90244	0.280376	6.78531	1.15836e-11	4.79147e-10	9.21471	18.3666	21.472	4.0995	5.48911	3.97892
rarga	1230.19	-1.09889	0.287912	-3.81677	0.000135213	0.001231	45.5808	56.9404	64.2514	131.327	119.135	118.781
rasa4	19.6145	1.64261	0.46323	3.54599	0.000391144	0.00306909	4.8291	1.8405	2.26237	0.858034	0.975039	1.13085
rasl10a	85.4248	1.58099	0.290427	5.44369	5.21866e-08	1.10883e-06	4.73055	5.48315	5.51197	2.33576	1.58895	1.54968
rasl11a	293.116	1.5717	0.383136	4.10221	4.09226e-05	0.000434693	1.37974	1.76381	2.13897	0.381349	0.577801	0.87955
rbfox1l	6.53682	4.14085	1.04084	3.97838	6.93876e-05	0.000689998	1.13336	1.26534	1.6865	0.0476686	0.14445	0.0418833
rbm25a	39.7482	1.30472	0.492112	2.65127	0.00801894	0.0371559	1.13336	1.03528	1.02835	0.572023	0.361125	0.418833
rbm38	2038.91	1.92825	0.269622	7.15166	8.57321e-13	4.16449e-11	95.2023	122.738	110.363	31.3183	32.1763	25.842
rbp1	99.2328	1.65281	0.373632	4.42363	9.70544e-06	0.000123022	5.76535	3.10584	5.84104	2.62177	0.938926	1.29838
rbpjb	357.826	-1.23625	0.192699	-6.41543	1.4043e-10	4.99694e-09	8.62339	9.04911	7.98001	17.7804	20.7286	24.2504
rbpms2a	77.2579	1.33321	0.32371	4.11853	3.81301e-05	0.000409504	6.65233	3.48927	3.99001	2.28809	2.41954	1.08897
RBPMS	128.898	1.81559	0.325379	5.57991	2.40638e-08	5.44181e-07	5.22331	6.01996	8.67929	1.81141	2.23898	1.80098
rca2.1	333.932	-1.33549	0.244692	-5.45783	4.81976e-08	1.0339e-06	6.89871	8.20555	10.5715	23.4529	19.4647	24.1248
rcan2	9.97139	-2.7396	0.666681	-4.10932	3.96828e-05	0.000423714	0.0985531	0.345093	0.123402	1.57306	1.4445	1.0052
rdh10a	1571.29	6.34488	0.27254	23.2805	6.98308e-120	1.03119e-115	158.818	186.12	206.822	2.5741	2.52788	1.92663
rdh8a	1251.49	2.85234	0.393214	7.25392	4.04883e-13	2.04058e-11	6.25812	8.20555	9.78991	1.23938	1.19171	1.04708
reck	253.064	1.67342	0.301909	5.54282	2.97638e-08	6.61931e-07	26.56	32.6305	38.7483	8.77102	15.4923	7.58088
reep2	813.938	-1.58105	0.273623	-5.7782	7.55056e-09	1.88982e-07	24.1455	20.4755	23.8166	66.3547	62.7636	83.1384
rem1	109.738	2.11927	0.40655	5.2128	1.86007e-07	3.53965e-06	22.5686	22.8912	28.1357	5.24354	5.27243	7.0364
rgmb	421.145	1.39581	0.235664	5.92288	3.16361e-09	8.55623e-08	25.476	33.9342	24.4748	9.58138	13.145	10.3871
rgs5a	214.521	1.74607	0.448516	3.89299	9.9015e-05	0.000936678	2.41455	4.79296	6.00557	1.52539	1.33616	1.21462
rhcgl1	59.1761	3.61558	0.532352	6.7917	1.10819e-11	4.60976e-10	2.26672	1.99387	6.04671	0.286011	0.2889	0.293183
rhof	32.699	-1.3204	0.496017	-2.662	0.00776771	0.0361962	1.92178	1.72547	2.46804	6.33992	4.94742	4.48152
RHOU_(1_of_2)	10.9551	-2.43988	0.598673	-4.07549	4.59178e-05	0.000478862	0.492765	0.191718	0.123402	1.33472	1.58895	1.5078
rims1b	12.5601	-1.64138	0.544537	-3.01426	0.00257607	0.0147904	0.886977	0.536811	0.534743	1.76374	2.23898	2.30358
rims2b	43.7348	-2.00601	0.397264	-5.04957	4.4281e-07	7.68388e-06	1.33047	1.07362	2.55031	9.05703	5.74189	5.69613
ripply1	1673.16	5.94343	0.432478	13.7427	5.63111e-43	2.96981e-40	51.9375	33.6274	59.2742	1.23938	0.505576	0.712016
ripply2	54.4315	6.25199	0.644087	9.70676	2.82177e-22	3.56146e-20	7.49003	5.52149	8.55589	0.238343	0.0722251	0
rln3a	19.3061	-2.50197	0.4859	-5.14916	2.61661e-07	4.82391e-06	0.985531	0.690186	1.23402	4.81453	4.69463	7.539
rnaset2	441.748	1.09416	0.303918	3.60018	0.000317994	0.0025787	22.9629	24.1949	26.6137	11.4405	12.6033	11.7692
rnd3a	837.692	1.01823	0.234683	4.33874	1.433e-05	0.000173736	20.2527	24.6166	26.4492	11.6788	12.7838	12.0205
rnd3b	51.4323	4.3307	0.87608	4.94327	7.68225e-07	1.26189e-05	1.13336	1.03528	1.06949	0.0953372	0.0361125	0.0418833
rnf41l	18.0726	-1.63877	0.40033	-4.09356	4.24794e-05	0.000447108	0.689871	0.536811	0.740413	1.85907	2.20287	2.2617
roraa	27.8765	-2.32973	0.622511	-3.74248	0.000182214	0.00160069	0.985531	0.996935	0.781547	6.00624	3.53903	4.81658
RPS11_(2_of_2)	176.153	5.31215	0.613277	8.66191	4.63908e-18	4.12682e-16	9.31326	7.36199	12.8338	0.429017	0.14445	0.209417
rps6ka1	97.3297	-1.00994	0.277746	-3.6362	0.000276691	0.00228901	2.90732	3.18252	2.42691	3.81349	8.30588	5.69613
rpz2	357.568	1.08142	0.274481	3.93987	8.15242e-05	0.000790978	20.1048	12.3467	19.4564	10.3918	7.7642	7.20393
rrbp1b	6755.46	1.20524	0.314596	3.83107	0.000127587	0.00116696	185.773	229.372	192.549	91.19	84.7561	97.1693
rsph4a	73.6287	1.74057	0.396	4.3954	1.10571e-05	0.000138256	3.40008	2.1089	2.13897	0.66736	0.577801	1.13085
rtkn2b	78.0246	-1.05626	0.388205	-2.72089	0.00651063	0.0314602	2.95659	2.03221	2.26237	4.48085	7.04195	4.10457
rtn1b	347.462	-3.22071	0.300817	-10.7066	9.48301e-27	1.73448e-24	4.68127	9.20248	8.67929	56.7256	88.9452	73.1283
rtn4r	7.23749	-5.60719	1.4179	-3.95458	7.66679e-05	0.000751763	0	0.0383437	0.0822681	1.52539	2.78067	1.96852
rwdd2b	377.146	1.12197	0.194056	5.78171	7.39467e-09	1.85394e-07	18.4294	15.9126	19.7444	8.53268	8.37811	8.83738
rxrga	130.969	2.34638	0.41381	5.67018	1.4265e-08	3.39759e-07	4.8291	4.44787	7.03393	1.09638	1.01115	1.21462
RYR2	34.6902	-2.8705	0.352926	-8.13345	4.17244e-16	3.00558e-14	1.13336	0.766873	0.987218	6.05391	9.82261	5.90555
ryr3	140.076	-4.68654	0.437739	-10.7062	9.51397e-27	1.73448e-24	1.82323	1.8405	1.23402	31.1276	59.2246	41.1713
s100s	248.337	4.63983	0.476154	9.7444	1.94933e-22	2.50311e-20	19.957	6.82517	5.47083	0.524354	0.252788	0.586366
s1pr1	35.8014	2.74273	0.442334	6.20058	5.6255e-10	1.79809e-08	3.89285	4.75462	4.68928	0.810366	0.794476	0.460717
sall3a	294.539	1.40671	0.473785	2.96909	0.0029868	0.0166942	5.37114	7.43867	6.12898	1.47773	2.6001	3.35067
sall3b	402.454	2.88119	0.461588	6.24191	4.32258e-10	1.428e-08	6.25812	9.08745	6.12898	0.953372	0.902814	1.17273
sarm1	66.3571	1.69032	0.458944	3.68306	0.000230451	0.00195602	3.05514	2.454	2.26237	0.858034	0.722251	0.921433
SASH1_(2_of_2)	124.676	1.46027	0.48414	3.01621	0.00255959	0.014718	4.63199	3.60431	4.60702	1.47773	1.22783	2.13605
sbf2	222.604	1.82262	0.307265	5.93176	2.99704e-09	8.12059e-08	29.4181	30.7133	14.4381	6.5306	8.0531	7.37146
scara5	15.3295	-1.26799	0.485226	-2.61319	0.00897019	0.0407021	0.246383	0.958592	0.90495	1.71607	2.0223	1.59157
SCARNA14	20.185	1.92559	0.568783	3.38546	0.0007106	0.00506684	3.00587	1.8405	1.60423	0.762697	0.541688	0.460717
sc:d217	19.6199	-7.10229	1.1034	-6.43672	1.22086e-10	4.42957e-09	0.0492765	0	0.0411341	3.00312	3.4668	5.69613
scg3	119.446	-1.15028	0.368912	-3.11804	0.0018206	0.0110728	9.16543	3.37424	3.94887	11.6788	12.5311	13.7796
scml4	33.3253	1.37467	0.467185	2.94246	0.00325611	0.0178813	2.36527	2.07056	1.8099	0.905703	0.758363	0.837666
scn4bb	52.819	-1.39098	0.288025	-4.82936	1.36971e-06	2.1381e-05	1.62613	1.4954	1.35742	3.24146	3.93627	4.98411
scube1	263.934	1.88385	0.389984	4.83059	1.36131e-06	2.12725e-05	6.25812	6.78683	7.6098	1.62073	2.45565	1.71722
scube3	28.7519	1.33357	0.519929	2.56491	0.0103202	0.0454783	1.72468	1.41872	2.13897	1.14405	0.613913	0.418833
sell	15.0644	-2.22274	0.525591	-4.22903	2.34699e-05	0.000266805	0.295659	0.306749	0.534743	2.19275	1.51673	1.80098
sema3e	321.772	1.26843	0.230291	5.50794	3.6305e-08	7.95424e-07	18.2323	22.1626	23.2408	7.67464	12.7116	6.99451
sema3fa	119.576	2.14796	0.364502	5.89286	3.79572e-09	1.00994e-07	5.56825	6.01996	6.62259	1.62073	1.58895	1.04708
sema3ga	35.3479	2.36345	0.39106	6.0437	1.50615e-09	4.33554e-08	1.72468	2.7224	2.30351	0.476686	0.43335	0.460717
sema4ga	22.6019	1.18542	0.413851	2.86436	0.00417849	0.0219508	1.33047	1.227	1.27516	0.715029	0.577801	0.460717
sema5bb	218.995	2.69738	0.796621	3.38602	0.000709131	0.00505881	2.66093	3.25921	3.57866	0.524354	0.613913	0.37695
sepp1a	234.722	1.10536	0.433834	2.54788	0.0108379	0.0471133	60.8565	38.4204	54.8317	36.6095	17.2618	19.8527
sept9a	1768.91	2.57503	0.233961	11.0062	3.56716e-28	7.41918e-26	44.9402	56.2118	46.5638	8.24666	9.17259	8.2929
serpina1	79.805	1.37062	0.388758	3.52562	0.000422485	0.00328015	15.4728	18.9418	23.6521	11.6788	5.63356	5.7799
serpina1l	88.7026	2.51994	0.404889	6.22379	4.85294e-10	1.58197e-08	17.0497	23.7731	35.6632	6.86428	3.82793	3.0156
serpinb14	756.443	-2.15956	0.335692	-6.43316	1.24977e-10	4.51232e-09	23.1107	35.6213	22.6649	112.736	144.197	121.085
serping1	17.4175	1.63693	0.511651	3.19932	0.00137753	0.00879464	1.42902	1.07362	1.8099	0.572023	0.2889	0.586366
serpinh1a	491.07	-3.63695	0.386222	-9.41672	4.65385e-21	5.36901e-19	7.93352	10.3144	8.02114	77.7475	117.619	145.042
setd6	233.439	1.30402	0.22153	5.88643	3.94637e-09	1.04625e-07	14.6844	13.8804	17.5642	5.62489	8.30588	5.40295
sf3b4	9142.28	1.01273	0.162099	6.24764	4.1671e-10	1.38593e-08	88.0572	92.83	80.088	40.1846	48.0297	46.1135
sh3gl1b	540.699	1.29362	0.175796	7.35865	1.85785e-13	9.7287e-12	26.3629	30.4832	27.4776	10.7731	12.3505	12.565
sh3gl3a	35.9158	-1.28874	0.480337	-2.68299	0.00729661	0.0344575	0.985531	1.41872	3.16732	4.81453	5.27243	3.97892
sh3glb1a	1834.03	-1.01953	0.135751	-7.51028	5.90009e-14	3.3128e-12	41.7865	51.4572	49.2375	95.3372	102.054	102.153
shc2	11.8915	-3.53701	0.580777	-6.09014	1.12809e-09	3.33837e-08	0.295659	0.0766873	0.246804	2.5741	2.41954	2.2617
shha	3075.49	5.76886	0.520475	11.0838	1.50295e-28	3.21654e-26	24.2933	25.5752	25.2152	0.619692	0.397238	0.418833
shhb	1802.13	6.16364	0.408804	15.0773	2.28534e-51	1.77619e-48	17.7395	21.6642	23.8578	0.33368	0.216675	0.37695
SHROOM2_(1_of_2)	23.2685	1.43796	0.496705	2.89501	0.00379152	0.020286	2.36527	2.99081	1.72763	0.762697	1.48061	0.460717
si:ch1073-109g21.1	53.8346	6.94531	1.12469	6.17529	6.60421e-10	2.08832e-08	2.75949	3.10584	3.82547	0	0.0722251	0
si:ch1073-147e4.1	183.883	-6.38065	0.396459	-16.0941	2.80593e-58	3.39498e-55	0.246383	0.498468	0.370207	24.454	30.1901	43.6424
si:ch1073-164k15.3	127.205	7.11628	1.06545	6.67912	2.40385e-11	9.61998e-10	3.59719	3.06749	4.40135	0.0476686	0.0361125	0
si:ch1073-261d9.1	56.3001	1.37106	0.318659	4.30259	1.68813e-05	0.000201037	2.26672	3.3359	3.00279	0.619692	1.62506	1.17273
si:ch1073-288h17.2	17.462	-1.89126	0.667706	-2.83247	0.00461897	0.0237873	0.246383	0.383437	0.452475	1.33472	1.04726	1.80098
si:ch1073-303k11.2	184.149	2.08782	0.361494	5.77555	7.67024e-09	1.91329e-07	6.01174	4.37118	2.83825	1.33472	0.902814	1.0052
si:ch1073-328c12.2	41.7746	1.11413	0.363131	3.06813	0.00215402	0.0127993	1.23191	1.15031	1.19289	0.33368	0.758363	0.586366
si:ch211-101l18.8	35.7463	6.14914	0.683979	8.99025	2.46671e-19	2.47795e-17	8.37701	8.35892	9.50197	0.286011	0.0722251	0.0418833
si:ch211-103a14.1	20.3791	-1.60906	0.406843	-3.95499	7.65385e-05	0.000751343	0.492765	0.651842	0.658145	1.62073	1.76951	2.34547
si:ch211-105c13.3	550.55	-2.065	0.276895	-7.45772	8.80348e-14	4.79708e-12	11.0872	14.4556	11.1473	44.9515	61.3913	53.3175
si:ch211-106f21.1	181.253	-1.75739	0.365515	-4.80797	1.52469e-06	2.34287e-05	6.25812	7.05524	7.11619	20.6882	27.3733	23.6641
si:ch211-108c6.2	44.0016	-6.56516	0.633062	-10.3705	3.37804e-25	5.19619e-23	0.394212	0.0766873	0	9.91506	19.4647	14.0728
si:ch211-108d22.2	629.151	-3.14723	0.215725	-14.5891	3.29399e-48	2.3163e-45	9.26399	10.6595	15.0139	97.9113	113.249	109.567
si:ch211-110p13.9	478.75	-1.0175	0.276865	-3.67506	0.000237792	0.0020074	8.47556	18.7501	12.4225	22.5949	31.5262	29.3602
si:ch211-113a14.17	1031.82	-1.38578	0.494048	-2.80495	0.00503247	0.0255026	27.4963	75.1919	34.4292	140.289	105.557	124.77
si:ch211-113a14.29	5341	1.35813	0.431641	3.14643	0.00165277	0.0102248	362.725	255.676	269.469	159.022	65.5443	132.77
si:ch211-113a14.6	3187.2	1.9875	0.446292	4.45337	8.4531e-06	0.000108734	318.77	93.5969	201.598	62.6365	45.1768	52.6054
si:ch211-113a14.7	1047.82	2.22741	0.443053	5.02741	4.97159e-07	8.49716e-06	102.544	31.7486	77.8668	19.5918	13.2172	14.0309
si:ch211-113h16.1	13.9945	-9.22681	1.30686	-7.06031	1.66127e-12	7.81274e-11	0	0	0	3.86115	5.01964	5.7799
si:ch211-11n16.3	29.7053	-4.78181	0.716939	-6.66975	2.56231e-11	1.01788e-09	0.0985531	0	0.20567	2.38343	2.23898	3.89515
si:ch211-127i16.2	30.7124	1.80134	0.421015	4.27856	1.88104e-05	0.000221687	1.87251	1.72547	1.8099	0.33368	0.866701	0.37695
si:ch211-128n12.5	41.2402	-1.89173	0.514081	-3.67983	0.00023339	0.00197619	0.344936	0.383437	1.27516	3.62281	1.58895	2.47112
si:ch211-12e13.12	9.1668	-2.39328	0.788396	-3.03564	0.00240029	0.0139493	0.246383	0.115031	0.370207	1.19171	1.55284	1.21462
si:ch211-12e13.1	32.4921	-1.18912	0.392987	-3.02584	0.00247944	0.0143247	1.72468	1.64878	1.27516	3.76582	4.36962	2.84807
si:ch211-135f11.1	22.6769	-1.56057	0.488069	-3.19744	0.00138651	0.00883136	1.13336	0.613499	0.987218	2.71711	2.70844	2.88995
si:ch211-137a8.2	112.912	-1.29996	0.350472	-3.70916	0.000207949	0.00179473	2.316	1.4954	2.30351	5.10054	5.09187	5.36106
si:ch211-145c1.1	86.1814	1.16304	0.450067	2.58414	0.00976222	0.0433991	3.40008	2.03221	5.38856	2.5741	0.866701	1.54968
si:ch211-145h19.5	16.4003	-4.01002	0.808392	-4.96049	7.03152e-07	1.16799e-05	0	0.153375	0.0822681	1.09638	1.22783	1.84287
si:ch211-145n14.3	29.2405	-2.67186	0.827405	-3.22921	0.00124134	0.00806525	0	0.996935	1.43969	2.52643	7.04195	6.61756
si:ch211-146l10.7	220.875	1.02242	0.214948	4.75659	1.96895e-06	2.93988e-05	10.5452	14.5706	12.9984	6.48293	7.69197	5.2773
si:ch211-149k23.9	7.06029	-2.62678	0.787857	-3.33408	0.000855816	0.00590553	0.197106	0.115031	0.329073	1.09638	1.4445	1.54968
si:ch211-14a17.6	83.9115	1.38567	0.381289	3.63418	0.000278866	0.00230443	2.71021	4.25615	3.8666	2.19275	1.11949	1.0052
si:ch211-14g13.5	510.618	1.48506	0.276591	5.36915	7.91088e-08	1.63843e-06	20.7454	39.1105	25.6265	10.8208	9.82261	11.0153
si:ch211-153f2.7	12.1488	-1.85515	0.555056	-3.34227	0.000830947	0.00576084	0.640595	0.536811	0.287939	1.28705	2.56399	1.63345
si:ch211-156j16.1	508.174	2.50029	0.319551	7.82437	5.10208e-15	3.29006e-13	9.95386	11.0046	10.9005	2.47877	2.0223	1.34027
si:ch211-157j23.2	54.6068	2.29305	0.342975	6.68576	2.29731e-11	9.2186e-10	2.02034	1.99387	2.0567	0.524354	0.397238	0.37695
si:ch211-160d14.11	13.7717	-4.78428	0.892543	-5.36029	8.30896e-08	1.71367e-06	0	0.153375	0.164536	2.76478	3.64737	2.97372
si:ch211-160d14.15	15.0613	-4.15311	0.824599	-5.03653	4.74056e-07	8.18362e-06	0.0985531	0.191718	0.0822681	2.09742	3.03345	1.84287
si:ch211-160d14.9	56.0372	-6.52033	1.23083	-5.2975	1.17402e-07	2.32947e-06	0	0	0.575877	19.4011	17.8396	17.0465
si:ch211-162i8.4	22.5373	-2.22608	0.721108	-3.08703	0.00202166	0.0121258	0.344936	0.0766873	0.452475	1.00104	2.0223	1.17273
si:ch211-162i8.7	62.7293	-1.11867	0.370848	-3.0165	0.00255708	0.0147099	1.57685	1.8405	2.87939	4.52852	2.81678	6.82698
si:ch211-163l21.11	9.7273	2.45014	0.589056	4.15944	3.19034e-05	0.000349754	1.28119	1.11197	1.06949	0.0953372	0.180563	0.37695
si:ch211-163l21.8	2652.52	4.20402	0.283028	14.8537	6.5794e-50	4.8579e-47	49.6215	57.6305	53.3509	2.62177	2.81678	3.60197
si:ch211-168d23.3	5.79774	-1.8638	0.58608	-3.18012	0.00147214	0.00925957	0.246383	0.230062	0.411341	1.04871	1.04726	1.2565
si:ch211-178n15.1	13.6316	-2.24273	0.526592	-4.25895	2.05392e-05	0.000238821	0.0985531	0.460124	0.370207	1.23938	2.13064	1.29838
si:ch211-189e2.3	42.8487	1.62491	0.416791	3.89862	9.67419e-05	0.000917525	1.52757	1.61043	3.37299	0.524354	0.613913	1.04708
si:ch211-191i18.4	61.9353	1.42359	0.327409	4.34804	1.3736e-05	0.000166947	14.4873	7.97548	11.2296	4.57618	4.0446	4.39775
si:ch211-193l2.6	9.49196	-2.45259	0.616592	-3.97765	6.96003e-05	0.000691647	0.344936	0.153375	0.370207	1.38239	1.98619	1.5078
si:ch211-195b13.1	427.53	1.0159	0.227478	4.46594	7.97197e-06	0.000103356	30.9457	31.3651	29.2052	12.0602	16.5034	18.4705
si:ch211-195h23.3	38.4413	1.53996	0.391998	3.9285	8.54789e-05	0.000823934	1.97106	1.68712	4.44248	0.953372	1.08338	0.837666
si:ch211-197g15.9	102.149	-1.45465	0.41995	-3.46387	0.000532473	0.0039743	6.60305	3.14418	2.42691	12.8705	10.6171	11.0991
si:ch211-197h24.9	755.815	3.02142	0.265409	11.384	5.02298e-30	1.19636e-27	30.4036	50.3069	45.9879	5.95857	5.41688	4.7747
si:ch211-198n5.11	216.353	1.09744	0.181382	6.05041	1.44474e-09	4.18323e-08	13.551	12.3467	13.204	5.52956	7.1864	6.19873
si:ch211-1e14.1	46.9857	1.82002	0.557947	3.262	0.0011063	0.00733249	4.87838	2.95246	4.36021	1.38239	0.938926	1.2565
si:ch211-1k7.1	68.2286	5.20344	0.697858	7.45631	8.89815e-14	4.83084e-12	2.316	2.49234	2.50918	0.0953372	0.108338	0
si:ch211-203c7.2	834.53	2.31477	0.451245	5.12973	2.90163e-07	5.29456e-06	44.9402	43.3667	51.0474	8.81869	14.2283	6.0312
si:ch211-207e19.15	49.7821	1.93967	0.371887	5.21575	1.83077e-07	3.48839e-06	1.72468	2.26228	2.71485	0.476686	0.541688	0.795783
si:ch211-209l18.4	321.855	-6.22422	0.890973	-6.98587	2.83102e-12	1.27069e-10	0.837701	0.996935	0.164536	47.0489	54.855	54.0714
si:ch211-209l18.8	253.365	1.16098	0.242752	4.78259	1.73055e-06	2.62604e-05	11.8756	16.9479	15.5898	4.81453	6.68082	9.13056
si:ch211-209p16.1	97.9795	-1.32437	0.411077	-3.22172	0.00127423	0.00824928	1.18264	1.07362	3.94887	4.48085	6.42803	5.15165
si:ch211-213a13.1	108.7	-2.12931	0.338733	-6.2861	3.25546e-10	1.09757e-08	1.42902	2.454	1.76877	6.48293	10.0393	9.2981
si:ch211-213a13.2	67.6969	-1.31109	0.327446	-4.00399	6.22817e-05	0.000628898	2.85804	3.83437	4.31908	6.62593	11.1949	10.5965
si:ch211-214j24.15	4.4879	-2.70776	0.900431	-3.00718	0.00263681	0.0150805	0.246383	0.230062	0.0411341	1.23938	1.08338	1.17273
si:ch211-215a9.36	22.1588	-4.3887	0.585695	-7.49316	6.72363e-14	3.74671e-12	0.0492765	0.42178	0.164536	4.33784	5.48911	4.5234
si:ch211-217g15.3	7.95636	-2.1036	0.747545	-2.81401	0.00489276	0.0249487	0.689871	0.230062	0.534743	3.24146	1.48061	1.67533
si:ch211-221j21.3	130.938	-1.258	0.282516	-4.45284	8.47425e-06	0.000108911	4.68127	5.98161	6.58145	10.3918	16.359	16.1251
si:ch211-222e20.4	82.9728	-2.46646	0.439692	-5.60951	2.02897e-08	4.6597e-07	0.394212	0.613499	1.43969	2.95545	5.41688	5.73801
si:ch211-222k6.2	30.6599	-1.53575	0.349151	-4.39852	1.0899e-05	0.000136511	0.640595	0.843561	0.863816	2.19275	2.63622	2.2617
si:ch211-222n22.1	111.268	1.71084	0.409543	4.17743	2.94815e-05	0.000327088	3.9914	2.37731	3.99001	1.95441	1.11949	0.209417
si:ch211-223a21.4	167.751	1.96962	0.227238	8.66761	4.41268e-18	3.94921e-16	7.88424	9.70095	10.1601	2.62177	1.91396	2.84807
si:ch211-223a21.6	29.9028	3.95646	0.652764	6.06108	1.35212e-09	3.93822e-08	1.23191	2.07056	2.13897	0.0476686	0.216675	0.0837666
si:ch211-223c9.2	27.8967	3.51592	0.526604	6.67658	2.44575e-11	9.76117e-10	1.42902	2.99081	3.7432	0.238343	0.2889	0.209417
si:ch211-224l10.4	34.2477	1.96979	0.561632	3.50726	0.000452753	0.00348582	8.27846	7.70708	10.5715	3.52747	1.95008	1.5078
si:ch211-233h19.2	80.239	-1.19932	0.360711	-3.32489	0.00088454	0.00607252	1.87251	2.454	2.79712	5.52956	4.40573	7.0364
si:ch211-235e15.1	23.2355	-1.74857	0.489723	-3.57053	0.000356261	0.00282928	0.837701	1.07362	1.02835	2.90778	3.71959	3.64385
si:ch211-237h22.2	187.758	-1.17929	0.323643	-3.6438	0.000268641	0.00222992	8.62339	6.78683	11.2296	17.2084	23.6898	21.6537
si:ch211-246b8.2	13.0829	-2.8971	0.511115	-5.6682	1.44305e-08	3.43149e-07	0.443489	0.306749	0.329073	2.47877	3.61125	2.17793
si:ch211-246m6.5	163.777	2.37086	0.43138	5.49599	3.88524e-08	8.49975e-07	19.957	17.2163	20.3614	4.0995	3.35847	4.06268
si:ch211-247j9.1	212.884	1.82451	0.515669	3.53813	0.000402969	0.00314516	1.77395	3.75768	3.12619	0.762697	0.975039	0.795783
si:ch211-248a14.8	13.5585	-3.80865	0.607741	-6.2669	3.68304e-10	1.22771e-08	0.14783	0.306749	0.20567	4.2425	3.03345	2.42923
si:ch211-248k15.3	18.498	-1.04585	0.394957	-2.64802	0.00809658	0.0374334	0.936254	1.07362	1.15175	1.71607	2.09453	2.97372
si:ch211-250c4.4	329.19	-1.04581	0.245936	-4.25236	2.11532e-05	0.000244995	15.1772	23.2363	22.089	43.3784	43.7323	42.2603
si:ch211-250c4.5	15.6091	-1.72566	0.582324	-2.96341	0.00304253	0.0169415	0.788424	0.690186	0.699279	1.76374	3.28624	2.42923
si:ch211-250k18.6	41.2773	-1.46824	0.339005	-4.33102	1.48418e-05	0.000178704	1.4783	2.91412	2.87939	5.57722	8.55867	6.82698
si:ch211-251f6.7	74.7093	1.52842	0.426962	3.57975	0.000343917	0.00274361	2.02034	1.72547	3.78433	1.57306	0.361125	0.795783
si:ch211-26b3.4	55.28	-1.4281	0.342932	-4.16437	3.12207e-05	0.000344057	4.33633	4.86965	2.46804	9.34304	14.9145	8.46043
si:ch211-274j7.3	172.614	-1.67002	0.320693	-5.20754	1.91365e-07	3.62758e-06	7.24365	8.32058	6.86939	24.168	24.7732	25.13
si:ch211-274k16.6	72.0374	-2.10188	0.333744	-6.29788	3.01739e-10	1.02905e-08	1.77395	1.53375	0.987218	5.57722	6.93361	6.57568
si:ch211-278f21.5	16.6089	-1.68518	0.385244	-4.3743	1.21821e-05	0.000150352	0.837701	0.575155	0.370207	1.76374	2.09453	2.0104
si:ch211-284e13.9	35.6536	1.25817	0.492169	2.55638	0.0105766	0.0463182	5.96246	3.64265	3.6198	2.04975	1.55284	2.13605
si:ch211-285i13.2	71.3044	1.46689	0.437717	3.35123	0.000804526	0.00561836	2.316	3.52762	2.83825	0.858034	1.55284	0.837666
si:ch211-286o17.1	427.669	1.78066	0.250148	7.11842	1.09171e-12	5.25122e-11	9.21471	7.8988	9.00836	2.38343	2.56399	2.93183
si:ch211-39i2.2	1936.74	1.25604	0.176007	7.13631	9.58712e-13	4.62657e-11	48.4881	54.3713	39.8589	18.2094	19.4647	24.418
si:ch211-51a6.2	19.6423	2.13999	0.634444	3.37302	0.000743477	0.00527411	3.3508	5.90493	3.29073	1.09638	1.22783	0.62825
si:ch211-51f19.1	34.0253	2.73003	0.578401	4.71995	2.35897e-06	3.44559e-05	2.61166	2.33896	2.96165	0.476686	0.505576	0.2513
si:ch211-57i17.2	35.4471	-1.701	0.46203	-3.68158	0.000231793	0.00196604	0.492765	1.03528	1.15175	2.19275	2.889	4.0208
si:ch211-57n23.4	246.709	1.80915	0.327873	5.51784	3.43192e-08	7.54153e-07	8.1799	11.8865	10.7771	2.09742	3.71959	3.30878
si:ch211-69l10.4	117.169	10.4044	1.19215	8.72749	2.60386e-18	2.37353e-16	10.4959	10.3911	9.13176	0	0	0
si:ch211-71m22.1	48.857	1.14798	0.433206	2.64997	0.0080499	0.0372526	1.72468	1.18865	1.02835	0.619692	0.43335	0.795783
si:ch211-79g12.1	35.3085	-2.8654	0.439347	-6.52196	6.93956e-11	2.57479e-09	0.443489	0.306749	0.329073	2.62177	3.7557	1.67533
si:ch211-81n22.1	159.635	1.2857	0.268987	4.7798	1.75473e-06	2.64679e-05	9.41182	5.1764	7.73321	3.14613	3.10568	3.22502
si:ch211-82g18.3	15.608	-6.81399	1.13189	-6.02004	1.74377e-09	4.92355e-08	0.0492765	0.0383437	0	3.28913	4.55018	2.09417
si:ch211-84g22.1	28.4896	4.93769	0.933515	5.28935	1.22751e-07	2.42011e-06	1.4783	1.87884	1.43969	0.0476686	0.108338	0
si:ch211-87m7.3	90.9442	-1.64323	0.198145	-8.29305	1.10381e-16	8.62435e-15	2.90732	4.25615	4.27794	11.2021	13.5061	12.5231
si:ch73-112j3.1	62.0659	-2.02534	0.461455	-4.38903	1.13855e-05	0.000141882	1.42902	1.68712	1.39856	7.62697	3.68348	7.70653
si:ch73-112n4.1	115.204	1.07241	0.292242	3.6696	0.000242929	0.00204174	6.45523	5.71321	4.48361	2.76478	3.4668	1.96852
si:ch73-126m5.4	21.4287	-1.38939	0.378188	-3.6738	0.000238973	0.00201422	0.936254	1.18865	1.15175	1.90674	3.7557	3.2669
si:ch73-138e16.1	96.08	-1.31136	0.256807	-5.10642	3.28324e-07	5.92709e-06	3.84357	2.60737	2.87939	7.67464	7.36696	8.87926
si:ch73-138e16.4	88.742	-1.15189	0.235415	-4.89301	9.9307e-07	1.59572e-05	2.80876	1.68712	2.13897	4.57618	5.74189	4.81658
si:ch73-144l3.2	36.8268	2.05782	0.687011	2.99532	0.00274157	0.0155292	1.52757	2.41565	5.51197	1.23938	0.469463	0.62825
si:ch73-173m3.3	50.8598	1.74203	0.686121	2.53896	0.0111183	0.0479088	2.71021	3.10584	4.56588	1.14405	0.975039	1.08897
si:ch73-211l2.1	5.36641	-4.97336	1.60901	-3.09095	0.00199518	0.0120207	0.0492765	0.0383437	0.0411341	1.38239	1.40839	1.38215
si:ch73-213k20.5	66.1553	4.2665	0.456599	9.34408	9.26918e-21	1.01391e-18	3.00587	3.91105	4.48361	0.0953372	0.252788	0.2513
si:ch73-234b20.5	234.273	1.68475	0.270803	6.2213	4.93046e-10	1.60018e-08	10.2002	8.09051	12.258	4.81453	2.23898	2.80618
si:ch73-234i15.6	42.1727	1.17578	0.369199	3.18468	0.00144917	0.00914523	3.20297	2.37731	2.75598	0.953372	0.866701	2.0104
si:ch73-239g21.2	122.114	2.10198	0.439839	4.77898	1.76187e-06	2.65486e-05	2.90732	5.67486	8.88496	1.38239	0.902814	1.92663
si:ch73-268e11.2	14.1375	-1.50268	0.502683	-2.98931	0.00279606	0.0157593	0.837701	0.690186	0.534743	1.76374	2.56399	1.71722
si:ch73-281f12.3	21.9228	-1.0696	0.349407	-3.06118	0.00220468	0.0130697	0.985531	0.996935	1.43969	2.28809	2.56399	2.59677
si:ch73-299h12.8	23.816	-2.36983	0.485882	-4.87738	1.07503e-06	1.71437e-05	0.295659	0.230062	0.287939	1.52539	1.26394	1.54968
si:ch73-352p4.8	56.6757	-1.07093	0.292864	-3.65676	0.00025542	0.0021382	1.72468	3.06749	3.08506	5.33888	5.77801	6.11496
si:ch73-366l1.5	203.898	2.25851	0.44633	5.06018	4.18855e-07	7.2939e-06	2.46383	4.37118	1.76877	0.476686	0.758363	0.62825
si:ch73-44m9.1	15.8623	-3.16887	0.603475	-5.25104	1.51247e-07	2.91574e-06	0.14783	0.230062	0.411341	1.76374	2.52788	3.14125
si:ch73-44m9.3	211.329	-1.32639	0.235866	-5.62349	1.87143e-08	4.32479e-07	6.01174	7.20861	7.69207	16.0643	17.0451	21.3186
si:ch73-52f24.4	2984.13	1.24531	0.458242	2.71758	0.00657617	0.0317043	83.1788	57.4772	91.729	41.1857	25.7121	34.2187
si:ch73-59f11.2	45.8888	5.26067	0.683072	7.70149	1.34487e-14	8.10598e-13	4.33633	3.68099	8.14455	0	0.2889	0.12565
si:ch73-61d6.3	8.83322	3.17518	0.679543	4.67253	2.9751e-06	4.24067e-05	1.23191	1.8405	1.11062	0.0476686	0.252788	0.167533
si:ch73-80e5.5	30.231	-1.87631	0.475217	-3.94833	7.8699e-05	0.000768617	1.03481	0.690186	1.27516	4.00416	3.97238	3.39255
si:ch73-92e7.4	116.033	1.08184	0.229813	4.70751	2.50766e-06	3.62334e-05	4.04068	5.06136	4.97722	2.81245	1.84174	2.30358
si:dkey-101k6.5	746.827	-7.47423	0.343386	-21.7663	4.84464e-105	3.57704e-101	1.37974	1.38037	1.31629	227.474	219.023	305.12
si:dkey-103d23.5	91.6468	2.94455	0.445283	6.61276	3.77227e-11	1.44689e-09	7.1451	11.0046	14.8905	0.429017	1.91396	2.09417
si:dkey-106c17.3	19.4978	3.39134	0.517945	6.54768	5.84363e-11	2.19017e-09	1.87251	2.60737	3.16732	0.33368	0.14445	0.293183
si:dkey-108k21.27	1171.29	2.06816	0.459209	4.50376	6.67626e-06	8.78754e-05	179.514	40.0691	96.9119	33.225	20.6925	24.2504
si:dkey-11f4.14	73.5901	-1.07397	0.347638	-3.08933	0.00200608	0.0120582	0.640595	0.536811	0.699279	1.38239	1.48061	1.21462
si:dkey-11n14.1	30.4234	2.38625	0.572924	4.16504	3.11301e-05	0.000343571	1.92178	2.41565	3.04392	0.429017	0.650026	0.37695
si:dkey-121a11.3	48.2222	-1.56686	0.310695	-5.04308	4.58091e-07	7.93971e-06	1.6754	2.49234	2.22124	5.86324	8.01698	5.82178
si:dkey-121n8.8	45.646	3.10283	0.459045	6.75933	1.38634e-11	5.6867e-10	1.6754	3.41259	2.71485	0.286011	0.361125	0.293183
si:dkey-122c11.4	72.1469	1.35884	0.267902	5.07214	3.93371e-07	6.89894e-06	3.64646	3.52762	3.20846	1.71607	1.40839	1.08897
si:dkey-13d5.1	15.8518	-5.45496	0.875125	-6.23335	4.56572e-10	1.49164e-08	0.246383	0.0383437	0	4.71919	3.25013	4.14645
si:dkey-13n15.11	33.592	1.10059	0.422218	2.60668	0.00914239	0.0413874	1.62613	1.34203	2.13897	0.715029	1.22783	0.5026
si:dkey-147f3.4	266.258	-1.15547	0.332469	-3.47544	0.000510023	0.00383869	11.2843	10.5062	9.78991	26.7897	25.8205	20.2715
si:dkey-147f3.8	97.9483	-1.09963	0.27753	-3.96219	7.42668e-05	0.000733066	4.38561	5.02302	3.57866	11.6788	10.0032	7.16205
si:dkey-149m13.4	44.5498	2.68704	0.548577	4.8982	9.67191e-07	1.56151e-05	1.57685	1.64878	2.83825	0.190674	0.397238	0.37695
si:dkey-14d8.2	21.7836	-1.88631	0.515356	-3.66021	0.00025201	0.00211085	0.788424	0.536811	0.493609	1.76374	2.70844	2.47112
si:dkey-14k9.3	27.853	-1.56872	0.347134	-4.51907	6.21123e-06	8.22586e-05	1.23191	0.690186	0.987218	2.71711	2.96123	3.18313
si:dkey-14o1.18	66.7278	-1.32107	0.466445	-2.83222	0.00462261	0.0237881	2.90732	4.37118	10.119	13.9669	11.0866	19.727
si:dkey-14o18.1	109.159	1.68571	0.3706	4.54859	5.40058e-06	7.2765e-05	9.90458	10.3528	9.99558	1.76374	3.32235	4.69093
si:dkey-159a18.1	211.579	5.09754	0.594691	8.57174	1.01936e-17	8.65108e-16	7.04654	8.28223	6.00557	0.0476686	0.252788	0.335067
si:dkey-15h8.11	422.101	2.60223	0.454107	5.73043	1.00177e-08	2.44112e-07	10.4466	9.16414	16.5359	1.95441	3.93627	0.2513
si:dkey-15h8.1	186.125	-1.17764	0.309528	-3.80462	0.00014202	0.00128663	5.07548	7.59205	12.0523	15.3493	18.5257	24.041
si:dkey-15h8.3	46.8395	-1.06572	0.252072	-4.22784	2.35944e-05	0.000267808	1.33047	2.454	1.97444	3.38447	4.98353	4.23022
si:dkey-15j16.6	221.718	-1.3062	0.355439	-3.67489	0.000237956	0.0020074	0.985531	1.57209	1.19289	3.47981	2.63622	3.56008
si:dkey-160o24.4	58.5966	5.0045	0.467851	10.6968	1.05362e-26	1.87455e-24	4.87838	5.48315	4.97722	0.238343	0.180563	0.0837666
si:dkey-167i21.2	47.5999	1.31511	0.481203	2.73295	0.00627693	0.0306215	3.49863	0.920248	2.50918	1.19171	0.686138	1.0052
si:dkey-16l2.17	63.7645	-2.20633	0.41358	-5.33472	9.56903e-08	1.94636e-06	2.56238	1.26534	3.29073	14.1576	8.01698	11.6017
si:dkey-16p19.1	44.213	1.13376	0.389473	2.911	0.00360269	0.0194093	1.03481	1.30368	1.85103	0.953372	0.43335	0.62825
si:dkey-178e17.1	107.602	2.90577	0.476365	6.09987	1.06152e-09	3.16038e-08	5.56825	6.86352	4.48361	0.858034	0.2889	1.21462
si:dkey-182g1.10	26.991	-1.24729	0.449885	-2.77246	0.00556342	0.0276896	1.23191	0.881904	0.329073	1.47773	2.49177	2.0104
si:dkey-182g1.8	34.6002	-4.08801	0.816089	-5.00927	5.46372e-07	9.27388e-06	0.0492765	0.498468	0.0411341	3.62281	3.90015	3.18313
si:dkey-183i3.6	13.0635	1.75897	0.538648	3.26554	0.00109257	0.00725772	1.92178	2.99081	2.55031	0.66736	1.19171	0.418833
si:dkey-183k8.1	57.703	1.17856	0.383693	3.07161	0.00212905	0.0126671	2.16817	3.56596	3.66093	0.762697	1.7334	1.80098
si:dkey-185e18.6	161.984	1.00324	0.224297	4.47281	7.71969e-06	0.000100526	9.21471	8.7807	7.65094	4.52852	5.45299	3.2669
si:dkey-188i13.11	32.9943	1.2449	0.433047	2.87474	0.00404364	0.0213793	2.11889	1.07362	2.0567	1.14405	0.613913	0.544483
si:dkey-189n19.3	11.115	-1.36564	0.491671	-2.77755	0.00547701	0.027361	0.591318	0.881904	0.452475	1.28705	2.70844	1.17273
si:dkey-189o20.1	22.8938	-1.60246	0.450545	-3.55672	0.000375516	0.0029622	0.640595	0.651842	0.617011	2.38343	1.95008	1.67533
si:dkey-18f7.2	31.7348	-1.03411	0.341009	-3.03252	0.00242523	0.014061	0.936254	0.72853	1.11062	1.43006	2.16675	2.2617
si:dkey-18h14.2	8.0444	-3.9525	0.889294	-4.44454	8.8079e-06	0.000112905	0.197106	0.115031	0.0822681	2.00208	1.7334	2.513
si:dkey-196j8.2	9.39372	3.59039	0.869212	4.13063	3.61776e-05	0.000391094	1.37974	1.57209	1.8099	0.190674	0.216675	0
si:dkey-19a16.7	252.914	-6.46951	0.620114	-10.4328	1.75696e-25	2.76012e-23	0.443489	0.115031	0.452475	24.454	25.9288	41.3388
si:dkey-19b23.12	32.7948	-2.15681	0.544006	-3.96468	7.34959e-05	0.000726448	1.28119	0.843561	1.43969	8.05599	4.29739	3.97892
si:dkey-19c16.1	10.0356	-1.75785	0.51414	-3.41901	0.000628501	0.00457421	0.246383	0.498468	0.452475	1.23938	1.04726	1.96852
si:dkey-1b17.7	69.5296	-1.14486	0.324175	-3.53161	0.000413039	0.00321357	2.02034	4.14112	3.20846	6.10158	7.69197	7.7903
si:dkey-205h23.1	75.8741	-1.42894	0.372791	-3.83308	0.000126551	0.00115857	4.33633	2.49234	3.94887	10.0581	10.6171	9.33998
si:dkey-207j16.5	71.4891	3.23065	0.520724	6.20414	5.49955e-10	1.76165e-08	5.86391	2.14725	5.05949	0.190674	0.650026	0.586366
si:dkey-207l24.2	33.9732	2.82819	0.55191	5.12437	2.98528e-07	5.42902e-06	1.03481	1.30368	1.56309	0.0953372	0.252788	0.209417
si:dkey-207m2.4	103.048	3.24911	0.495559	6.55646	5.51013e-11	2.08103e-09	3.10442	6.44174	7.89774	0.715029	0.397238	0.795783
si:dkey-20i20.10	27.0805	1.54951	0.365433	4.2402	2.23316e-05	0.000255834	1.4783	1.95553	1.39856	0.429017	0.686138	0.586366
si:dkey-20i20.11	28.6161	3.94309	0.59127	6.66886	2.57796e-11	1.01788e-09	1.28119	1.4954	2.09784	0.0953372	0.14445	0.0837666
si:dkey-20i20.8	242.811	1.86293	0.190901	9.7586	1.69477e-22	2.21475e-20	10.5452	14.4172	14.4792	3.90882	3.43069	3.93703
si:dkey-210i3.1	29.9958	8.76243	1.27622	6.86592	6.60625e-12	2.82767e-10	2.61166	2.03221	5.01836	0	0	0
si:dkey-211m23.2	72.7026	2.07391	0.428857	4.83591	1.32536e-06	2.07326e-05	8.08135	6.74849	4.64815	0.858034	2.3112	1.63345
si:dkey-215k6.1	79.2455	1.38199	0.470805	2.93539	0.00333131	0.0182063	1.92178	5.94327	8.96723	2.62177	1.7334	2.30358
si:dkey-21a6.5	61.1467	1.37965	0.344693	4.00255	6.26625e-05	0.000632061	7.19437	11.1964	9.4197	3.05079	3.93627	4.10457
si:dkey-221j11.3	159.083	1.04091	0.33061	3.14845	0.00164141	0.0101672	4.87838	3.64265	5.92331	2.33576	2.74455	2.17793
si:dkey-222f2.1	470.074	-1.30104	0.290377	-4.48052	7.44619e-06	9.72218e-05	15.4728	14.1872	12.4225	43.4261	31.454	32.3758
si:dkey-222f2.7	65.8476	6.39703	0.825134	7.75271	8.99497e-15	5.60459e-13	2.71021	3.52762	7.11619	0.0476686	0.108338	0
si:dkey-222f8.6	176.337	1.99776	0.205571	9.7181	2.52446e-22	3.21369e-20	6.20884	6.86352	7.4864	1.81141	1.62506	1.92663
si:dkey-222p3.1	8.54672	-7.30324	1.41122	-5.17514	2.2774e-07	4.27067e-06	0.0492765	0	0	2.76478	2.6001	2.13605
si:dkey-228b2.6	360.186	-2.70671	0.350083	-7.73164	1.06167e-14	6.53239e-13	4.58272	8.24389	9.00836	62.0645	35.3542	49.4642
si:dkey-22h13.2	39.8726	3.60531	0.597237	6.03664	1.57355e-09	4.50321e-08	1.72468	2.79909	2.75598	0.0476686	0.0722251	0.5026
si:dkey-234i14.21	24.0641	-1.08359	0.37538	-2.88666	0.00389357	0.0207643	0.788424	1.11197	1.02835	1.90674	2.41954	2.13605
si:dkey-238c7.12	99.9757	1.3649	0.440277	3.10008	0.00193466	0.0116712	10.7423	6.25002	9.09063	4.57618	3.21402	2.68053
si:dkey-238c7.16	342.328	1.06628	0.304658	3.49993	0.000465386	0.00355929	20.0555	16.1043	14.3147	8.67568	7.33085	9.00491
si:dkey-238g7.2	56.7871	1.8426	0.508961	3.62032	0.000294244	0.00240993	2.06961	2.83743	3.94887	0.572023	0.975039	1.0052
si:dkey-238i5.3	32.8911	-1.17554	0.391815	-3.00025	0.00269762	0.0153806	1.62613	1.07362	1.23402	2.90778	3.25013	3.0156
si:dkey-239j18.2	638.978	5.64919	0.597761	9.45059	3.36937e-21	3.94885e-19	6.40595	6.09664	7.40413	0.143006	0.180563	0.0837666
si:dkey-242h9.3	108.04	1.16175	0.413589	2.80895	0.00497032	0.0252744	5.51897	7.36199	7.73321	2.33576	5.66967	1.54968
si:dkey-242k1.4	19.8597	-2.15487	0.76845	-2.80417	0.00504459	0.0255552	0.0985531	0.958592	1.15175	1.71607	4.36962	4.18833
si:dkey-247i3.1	51.3433	1.42017	0.325246	4.36644	1.26288e-05	0.000154763	2.06961	1.95553	2.30351	0.66736	1.04726	0.712016
si:dkey-247k7.2	73.8871	2.42071	0.590307	4.10076	4.1179e-05	0.000436623	8.08135	3.22087	2.71485	1.19171	0.902814	0.62825
si:dkey-248g15.3	37.2106	8.68808	1.6509	5.26264	1.41998e-07	2.75906e-06	3.1537	2.41565	3.57866	0	0	0
si:dkey-253d23.3	106.906	1.26414	0.375497	3.36658	0.000761072	0.00537997	2.316	4.79296	2.26237	1.33472	0.902814	1.84287
si:dkey-257e4.6	10.7425	-3.53182	0.599068	-5.89553	3.7347e-09	9.97292e-08	0.246383	0.230062	0.123402	2.47877	2.99734	1.67533
si:dkey-259g19.2	53.1344	4.52762	0.710374	6.37357	1.84678e-10	6.50869e-09	6.25812	1.45706	9.62537	0.238343	0.325013	0.209417
si:dkey-261h17.1	1240.58	1.77597	0.301853	5.88355	4.01553e-09	1.06268e-07	46.3199	56.1351	59.0685	16.1596	18.2007	14.4916
si:dkey-261j4.3	40.5023	2.0329	0.391759	5.18915	2.11257e-07	3.9842e-06	4.87838	7.13192	5.34743	1.23938	1.11949	2.05228
si:dkey-261j4.5	207.69	2.72712	0.408929	6.66894	2.5765e-11	1.01788e-09	34.2965	43.2517	36.7327	6.33992	5.38077	6.15685
si:dkey-261m9.12	4029.98	1.04118	0.389632	2.67222	0.00753507	0.0353689	383.766	162.27	344.58	226.759	104.004	114.174
si:dkey-269i1.2	228.189	4.53435	0.484289	9.36289	7.75854e-21	8.74582e-19	5.32186	4.79296	5.47083	0.143006	0.252788	0.293183
si:dkey-269i1.4	629.631	4.92578	0.606987	8.11513	4.85265e-16	3.4786e-14	5.61752	4.67793	4.15454	0.190674	0.216675	0.0837666
si:dkey-269o24.1	56.8031	5.24369	0.670104	7.82518	5.06934e-15	3.28329e-13	2.80876	4.94633	5.75877	0.0953372	0.14445	0.12565
si:dkey-26g8.5	220.998	7.41501	0.940539	7.88378	3.17613e-15	2.08453e-13	7.78569	6.01996	6.74599	0.0476686	0	0.0837666
si:dkey-26m3.3	28.9538	3.52129	0.586082	6.00819	1.87602e-09	5.24681e-08	2.5131	6.71014	8.92609	0.429017	0.613913	0.586366
si:dkey-271j15.3	48.3168	-6.15916	0.853575	-7.21572	5.36502e-13	2.6856e-11	0.0985531	0.0383437	0.0411341	3.71815	3.39458	5.57048
si:dkey-286j15.1	1874.85	-1.82069	0.320062	-5.68857	1.28108e-08	3.08106e-07	13.2554	52.9526	30.0279	106.349	129.788	116.436
si:dkey-28g23.6	64.9687	5.41	0.683212	7.91848	2.40429e-15	1.58501e-13	3.44936	1.95553	4.97722	0.190674	0	0.0837666
si:dkey-29h14.10	24.9288	1.29452	0.403624	3.20723	0.00134019	0.00859832	2.80876	2.41565	1.72763	1.14405	1.08338	0.712016
si:dkey-29p9.3	151.625	-1.17211	0.218877	-5.35512	8.55e-08	1.75847e-06	6.94799	5.71321	6.37578	11.0591	17.9479	15.4968
si:dkey-33c14.2	8.56421	-1.51129	0.567798	-2.66166	0.00777555	0.0362213	0.394212	0.575155	0.822681	2.00208	1.87785	1.42403
si:dkey-33c14.6	36.0715	-1.48261	0.423002	-3.50498	0.000456643	0.00350298	1.37974	1.30368	1.6865	2.4311	6.03079	4.23022
si:dkey-34e4.1	189.619	-1.38393	0.359065	-3.85425	0.000116083	0.00107406	9.06688	6.55677	9.91331	20.0208	25.8566	23.2452
si:dkey-37o8.1	89.8137	1.61715	0.487162	3.31953	0.000901677	0.00616153	5.71608	3.41259	5.14176	2.33576	1.55284	0.921433
si:dkey-3e19.2	34.1346	-2.4571	0.439489	-5.59082	2.26002e-08	5.15823e-07	0.788424	0.613499	1.06949	4.8622	5.05576	4.10457
si:dkey-3n22.9	40.1541	1.30039	0.374947	3.46818	0.000523994	0.00392186	3.05514	2.68406	2.38578	0.619692	1.48061	1.29838
si:dkey-48g21.7	114.37	2.95714	0.330954	8.93521	4.06389e-19	4.00076e-17	3.1537	5.63652	6.12898	0.810366	0.613913	0.586366
si:dkey-48n15.2	37.5055	-1.38124	0.361902	-3.8166	0.000135305	0.00123108	2.90732	3.29756	4.03114	10.2487	8.16143	9.17245
si:dkey-4c15.15	22.4895	-1.48578	0.504318	-2.94611	0.00321794	0.0177288	0.246383	0.651842	0.452475	1.14405	1.37228	1.46592
si:dkey-4c15.9	22.443	-1.53432	0.431665	-3.55442	0.000378813	0.00298343	0.344936	0.843561	0.452475	1.23938	1.55284	2.21982
si:dkey-4e4.1	96.1553	1.21185	0.34968	3.46559	0.000529066	0.0039558	2.71021	3.25921	6.49918	1.81141	1.01115	2.7643
si:dkey-51a16.9	68.5717	2.15509	0.33307	6.47039	9.77499e-11	3.57295e-09	4.77982	6.36505	7.32186	1.95441	1.55284	0.795783
si:dkey-52l18.4	46.9547	1.40783	0.392448	3.58731	0.000334103	0.0026799	2.26672	1.68712	1.43969	1.00104	0.577801	0.544483
si:dkey-54i3.4	34.7068	3.32088	0.586227	5.66484	1.47162e-08	3.49381e-07	1.42902	2.56903	2.87939	0.286011	0.14445	0.293183
si:dkey-56i24.1	14.5124	-6.3896	0.888158	-7.19421	6.28217e-13	3.11305e-11	0	0.0766873	0.0822681	3.95649	5.30854	5.31918
si:dkey-57k17.1	72.8165	-1.37281	0.289612	-4.74016	2.1355e-06	3.15982e-05	3.1537	2.68406	1.97444	6.38759	8.70312	5.86366
si:dkey-57n24.6	50.9303	-1.13012	0.307936	-3.66997	0.000242577	0.00203994	0.689871	1.03528	0.822681	2.00208	1.91396	1.92663
si:dkey-60d5.3	78.125	2.18356	0.410628	5.31761	1.05137e-07	2.10945e-06	4.53344	8.55064	7.19846	1.23938	1.58895	1.80098
si:dkey-61p9.9	43.7737	1.28108	0.413018	3.10174	0.00192384	0.0116194	1.57685	1.80215	3.20846	0.619692	1.04726	1.13085
si:dkey-63j12.4	16.7752	-1.53213	0.57357	-2.67122	0.00755762	0.0354148	0.640595	0.306749	1.11062	1.81141	2.27509	2.05228
si:dkey-65b12.12	19.9274	-6.43421	1.09448	-5.8788	4.13258e-09	1.0917e-07	0	0.0766873	0	2.04975	3.25013	2.2617
si:dkey-6d5.1	70.8211	-2.3618	0.554294	-4.26092	2.03588e-05	0.000237847	0.689871	0.881904	2.30351	7.24562	6.10302	7.20393
si:dkey-71b5.3	23.2893	-8.95489	1.24619	-7.1858	6.68151e-13	3.27793e-11	0	0.0383437	0	6.38759	9.64205	7.62276
si:dkey-71b5.7	13.9737	-5.07687	0.889645	-5.70663	1.15234e-08	2.78961e-07	0.14783	0.115031	0.0822681	3.00312	5.85023	3.18313
si:dkey-74i1.5	5.92515	-3.99422	0.854234	-4.67579	2.92826e-06	4.1823e-05	0.197106	0.0766873	0	1.38239	1.48061	1.46592
si:dkey-77f17.1	84.1006	-1.70493	0.430318	-3.96203	7.43143e-05	0.000733066	2.316	3.06749	2.63258	5.81557	9.64205	11.7692
si:dkey-7i4.5	131.615	1.04602	0.241524	4.33092	1.48487e-05	0.000178704	4.43489	6.25002	4.93609	2.76478	2.63622	2.47112
si:dkey-7j22.1	26.8742	-1.88725	0.482996	-3.90738	9.3302e-05	0.000888897	0.344936	0.920248	0.946084	2.47877	3.35847	2.72242
si:dkey-7j22.2	38.6094	-1.33803	0.447185	-2.99212	0.00277046	0.0156508	0.295659	0.651842	1.35742	2.5741	1.95008	1.54968
si:dkey-7j22.4	235.387	-1.26016	0.374415	-3.36567	0.000763593	0.0053952	3.69574	4.17946	10.6126	14.2052	16.7562	14.7429
si:dkey-81e3.2	279.665	1.04919	0.337114	3.11226	0.00185662	0.0112687	21.0904	15.1074	13.0395	7.91298	12.8922	3.93703
si:dkey-81j8.6	34.6899	3.09648	0.544571	5.68609	1.29977e-08	3.11082e-07	1.97106	2.22393	1.27516	0.286011	0.216675	0.167533
si:dkey-82f1.1	19.2187	-1.96262	0.460722	-4.25988	2.0454e-05	0.000238407	0.886977	0.690186	1.06949	3.24146	3.82793	3.60197
si:dkey-82i20.2	125.4	-1.9872	0.285935	-6.94982	3.65744e-12	1.61705e-10	1.52757	1.99387	0.987218	7.4363	5.66967	5.48671
si:dkey-85k7.8	22.1528	-2.85521	0.806523	-3.54014	0.000399913	0.00312398	0.542042	0.42178	0	2.14509	2.78067	2.30358
si:dkey-88l16.5	345.049	1.85636	0.407187	4.55899	5.13995e-06	6.97625e-05	2.16817	1.38037	3.53753	1.14405	0.2889	0.62825
si:dkey-95h12.1	263.756	1.63941	0.463473	3.53723	0.000404353	0.00315429	17.9367	17.4847	22.9117	8.15133	7.36696	3.81138
si:dkeyp-114g9.1	2035.53	1.73266	0.569331	3.04332	0.00233983	0.0136949	69.0364	30.4832	40.805	11.5835	14.8784	17.5491
si:dkeyp-11g8.3	400.848	1.52118	0.293198	5.18823	2.12308e-07	3.99891e-06	36.9574	29.6013	53.8445	11.0591	13.1811	19.2244
si:dkeyp-14d3.1	19.5076	-1.59359	0.611914	-2.60426	0.00920722	0.0415916	0.837701	0.72853	0.781547	2.38343	2.27509	2.68053
si:dkeyp-20e4.9	81.3603	1.46452	0.359394	4.07498	4.60183e-05	0.000479571	3.05514	3.71934	3.29073	1.09638	1.26394	1.42403
si:dkeyp-34b8.1	11.424	-2.22546	0.534505	-4.16359	3.13284e-05	0.000344986	0.295659	0.153375	0.452475	1.14405	2.09453	1.08897
si:dkeyp-35e5.10	21.4769	-4.13013	0.675897	-6.11059	9.92648e-10	2.97331e-08	0.0985531	0.0766873	0.123402	2.52643	1.7334	1.13085
si:dkeyp-52c3.2	106.292	7.96536	1.27622	6.24136	4.33771e-10	1.4298e-08	4.87838	21.3191	13.1629	0	0.0361125	0.12565
si:dkeyp-53d3.3	42.6573	-1.24946	0.29162	-4.28454	1.83117e-05	0.000216327	1.18264	1.61043	2.01557	4.05183	3.79182	4.06268
si:dkeyp-69e1.8	44.1913	-1.62124	0.52492	-3.08854	0.00201141	0.0120742	0.394212	0.651842	0.164536	1.33472	1.55284	1.0052
si:dkeyp-72h1.1	23.8801	-1.78752	0.465625	-3.83896	0.000123557	0.00113539	1.03481	0.72853	1.35742	4.52852	2.6001	3.97892
si:dkeyp-74f1.2	134.014	-1.2298	0.338878	-3.62905	0.000284471	0.00234158	4.08995	5.63652	6.58145	9.34304	16.9368	13.4864
si:dkeyp-86c4.1	33.8103	4.81401	0.799507	6.02123	1.73101e-09	4.89691e-08	1.87251	2.7224	4.15454	0.0476686	0.180563	0.0837666
si:dkeyp-86f5.1	10.6779	-7.80204	1.47566	-5.28715	1.24234e-07	2.44607e-06	0	0.0383437	0	4.2425	1.33616	4.98411
si:dkeyp-86f7.4	7.88908	-3.50873	0.899533	-3.90061	9.59503e-05	0.000910603	0	0.153375	0.411341	2.19275	1.76951	2.7643
si:dkeyp-89c11.1	30.0885	-1.51723	0.442418	-3.4294	0.000604913	0.00442873	0.443489	0.613499	0.658145	2.14509	1.26394	1.71722
si:dkeyp-89c11.3	47.9201	-2.50524	0.56521	-4.43241	9.31869e-06	0.000118833	0.739148	1.11197	2.34464	10.1534	5.74189	8.62796
si:dkeyp-97a10.1	23.6652	3.3724	0.644838	5.22984	1.69659e-07	3.24527e-06	1.62613	1.41872	1.8099	0.143006	0.2889	0.0418833
si:dkeyp-98a7.10	102.488	1.53109	0.533582	2.86945	0.00411188	0.0216703	7.44076	3.10584	6.25238	3.3368	1.19171	1.46592
si:dkeyp-98a7.2	67.0103	1.85091	0.46385	3.99033	6.59816e-05	0.000661025	2.66093	1.45706	2.71485	0.762697	0.613913	0.586366
si:rp71-1d10.6	11.4031	-3.83758	0.850543	-4.51192	6.42443e-06	8.48613e-05	0.0985531	0.0383437	0.164536	1.23938	1.55284	1.63345
si:rp71-20i5.5	11.5312	-3.8484	0.713393	-5.39451	6.87107e-08	1.4311e-06	0.344936	0.0383437	0.164536	1.95441	3.82793	2.13605
si:rp71-36a1.2	29.4751	-4.21353	0.513686	-8.20255	2.35348e-16	1.77316e-14	0.344936	0.345093	0.0822681	4.29017	5.59744	4.90035
si:rp71-36a1.3	31.0539	-3.48182	0.842598	-4.13224	3.59246e-05	0.000388644	1.13336	0.0766873	0.287939	3.24146	5.88634	8.16725
si:rp71-36a1.5	95.4591	-1.7958	0.268438	-6.6898	2.23471e-11	9.00127e-10	3.25225	2.95246	2.67371	9.29537	13.5783	9.08868
si:rp71-68n21.12	48.1861	-2.37345	0.445977	-5.32192	1.02677e-07	2.06853e-06	3.40008	1.87884	1.97444	12.1555	10.1837	16.5858
si:rp71-68n21.9	115.019	1.36924	0.32057	4.27125	1.94377e-05	0.000228169	1.72468	1.95553	2.30351	0.905703	0.758363	0.7539
si:rp71-80o10.4	80.1197	3.98739	0.538924	7.39879	1.37431e-13	7.30018e-12	3.69574	3.75768	2.46804	0.190674	0.361125	0.0837666
si:rp71-84b10.3	129.288	3.58543	0.47738	7.51064	5.88378e-14	3.3128e-12	3.25225	1.72547	2.13897	0.143006	0.361125	0.0837666
sirt5	88.243	1.31865	0.376436	3.50299	0.000460059	0.00352429	2.95659	2.454	4.19568	0.762697	1.04726	2.17793
six1b	31.9308	1.6416	0.4102	4.00195	6.28236e-05	0.000632821	1.62613	2.1089	2.30351	1.09638	0.361125	0.586366
six4a	244.682	6.92667	0.401464	17.2535	1.05245e-66	2.59025e-63	35.3805	40.836	40.3937	0.286011	0.252788	0.460717
si:zfos-1505d6.3	137.606	1.99838	0.423631	4.71725	2.39048e-06	3.47928e-05	9.75675	6.9402	19.2507	3.62281	2.13064	3.5182
si:zfos-411a11.2	18.5599	5.71052	0.943048	6.05539	1.40082e-09	4.07202e-08	1.97106	4.25615	2.22124	0.0476686	0	0.12565
si:zfos-44a5.1	1175.74	-1.18458	0.317257	-3.73382	0.000188601	0.00164699	15.5714	19.2102	26.6137	37.6105	43.6239	63.3695
skap1	36.4623	1.54811	0.452439	3.4217	0.00062232	0.00454491	2.36527	4.60124	4.64815	0.762697	1.55284	1.80098
skilb	1579.83	2.13549	0.292191	7.30856	2.70024e-13	1.37974e-11	48.1924	53.5661	41.9979	6.62593	14.1561	13.3189
slain1a	161.598	-1.61511	0.231264	-6.98382	2.87266e-12	1.28547e-10	4.13923	3.98774	4.40135	12.4415	12.6394	14.701
slc12a7b	202.071	-1.79528	0.276738	-6.48729	8.73911e-11	3.20225e-09	5.22331	5.75155	7.363	18.9244	28.7095	18.4287
slc13a4	3217.78	1.2351	0.250503	4.93047	8.20311e-07	1.33703e-05	539.282	459.702	560.904	268.326	244.049	172.811
slc14a2	235.378	-2.25765	0.470037	-4.80312	1.56209e-06	2.39536e-05	3.30153	10.1227	3.82547	25.598	32.3929	27.8943
slc15a2	41.1157	-1.66344	0.362151	-4.59321	4.36475e-06	6.03504e-05	1.6754	1.45706	1.89217	5.62489	4.73074	6.11496
slc17a7a	13.1735	-3.27625	0.560237	-5.84797	4.976e-09	1.29367e-07	0.394212	0.383437	0.287939	4.43318	2.96123	3.2669
slc1a3a	490.865	3.77754	0.518706	7.28263	3.27374e-13	1.66128e-11	80.4193	34.8927	52.5282	4.19484	5.59744	2.93183
slc1a4	886.867	2.09677	0.410673	5.10568	3.29609e-07	5.94303e-06	6.20884	26.9556	10.0367	3.95649	3.25013	3.2669
slc20a1a	49.1857	6.521	1.0813	6.0307	1.63256e-09	4.65404e-08	3.05514	1.87884	2.46804	0.0953372	0	0
slc22a16	40.3821	1.40472	0.466241	3.01286	0.00258795	0.0148513	8.08135	10.6979	7.19846	3.62281	3.79182	2.7643
slc22a18	63.2983	3.0453	0.383991	7.93066	2.1799e-15	1.45003e-13	4.28706	4.33284	3.90774	0.524354	0.469463	0.586366
slc25a15b	73.5416	1.38206	0.314357	4.39645	1.10036e-05	0.000137704	13.9453	14.7623	21.5954	7.29329	5.48911	7.16205
slc25a21	92.0442	1.65721	0.321593	5.15311	2.56201e-07	4.741e-06	3.3508	4.48621	3.6198	0.953372	1.26394	1.54968
slc25a23b	14.2607	-1.55933	0.496331	-3.1417	0.00167969	0.0103696	0.443489	0.575155	0.822681	1.52539	2.27509	1.84287
SLC25A34	84.941	1.17798	0.306467	3.84374	0.000121175	0.00111489	10.151	8.85739	11.1885	4.81453	4.98353	4.0208
slc25a3a	25.3602	1.38908	0.514123	2.70185	0.00689556	0.0329217	2.11889	1.41872	2.79712	0.810366	0.975039	0.712016
slc26a4	188.755	3.27781	0.369262	8.87665	6.89024e-19	6.5644e-17	5.27259	4.63958	5.88217	0.190674	0.866701	0.586366
slc29a3	654.711	-1.11556	0.302718	-3.68516	0.000228563	0.00194647	13.7482	26.9173	20.3202	35.3224	54.7466	47.3282
slc2a15b	21.9053	1.5298	0.448421	3.41153	0.000645985	0.00467382	2.21744	2.64571	1.52196	0.524354	1.04726	0.712016
slc35a3b	68.5725	-1.01938	0.359944	-2.83206	0.00462492	0.0237883	1.62613	1.34203	1.11062	3.62281	2.45565	2.47112
slc35f3a	99.0466	1.32881	0.369722	3.59409	0.000325531	0.00262684	2.02034	1.87884	2.67371	0.953372	0.722251	1.04708
slc35f3b	59.3247	3.38572	0.446027	7.59084	3.17845e-14	1.82631e-12	5.42042	3.25921	4.52475	0.286011	0.469463	0.544483
slc38a7	1562.5	1.13926	0.201833	5.64456	1.65604e-08	3.85722e-07	191.045	204.679	206.452	92.2387	95.5899	95.5358
slc3a1	15.0536	-2.92341	0.636221	-4.59496	4.32838e-06	5.99599e-05	0.542042	0.498468	0.452475	3.14613	3.79182	4.81658
slc43a2a	101.22	1.32489	0.406401	3.26007	0.00111387	0.00737268	9.31326	7.70708	10.7771	4.8622	3.50292	3.09937
slc46a1	88.6411	-1.66682	0.196295	-8.49139	2.04175e-17	1.70342e-15	1.72468	2.454	2.75598	7.15029	8.37811	7.45523
slc4a4b	39.2645	1.0818	0.374939	2.88528	0.00391066	0.0208479	2.41455	1.38037	3.08506	1.19171	1.11949	1.04708
slc4a5	21.4165	-1.73465	0.515877	-3.36253	0.000772307	0.00544635	1.08408	0.536811	0.946084	1.90674	3.06957	3.85327
slc6a16a	82.9107	1.50443	0.563031	2.67201	0.00753976	0.035369	3.69574	13.3436	1.48083	1.62073	2.05841	3.14125
slc6a2	77.6747	2.75672	0.452525	6.09187	1.11602e-09	3.30928e-08	2.26672	1.64878	1.6865	0.0476686	0.2889	0.5026
slc7a3a	8292.18	1.23925	0.165914	7.46924	8.06572e-14	4.42775e-12	192.474	206.442	186.666	63.4945	99.5984	95.0332
slc7a5	245.501	1.00449	0.314775	3.19114	0.00141713	0.00900464	6.94799	10.3528	14.9728	5.0052	7.15028	4.48152
slc7a7	55.8333	1.3927	0.300354	4.63688	3.5371e-06	4.97926e-05	12.8612	14.0338	10.3658	5.57722	5.16409	3.97892
slc8a2a	6.25385	-2.28885	0.852427	-2.68509	0.00725095	0.0343078	0.295659	0.268406	0.164536	1.14405	1.37228	1.17273
slc8a2b	33.6321	-2.28204	0.562809	-4.05473	5.01914e-05	0.000517581	1.4783	0.72853	1.60423	6.62593	5.66967	6.82698
slc9a6a	509.961	1.14561	0.202826	5.64824	1.62096e-08	3.81075e-07	32.3747	48.7348	46.0702	18.9244	23.9787	16.6696
slit3	191.783	1.65621	0.491651	3.36866	0.000755335	0.00534453	3.1537	3.10584	3.08506	0.953372	1.1556	0.963316
smad9	239.872	-1.5712	0.302591	-5.1925	2.07493e-07	3.92323e-06	6.60305	6.86352	4.93609	17.3514	17.334	22.1144
smarcc2	89.8216	-1.69596	0.248311	-6.83	8.49175e-12	3.60338e-10	3.40008	4.17946	3.94887	13.7762	12.7477	12.2299
smdt1b	172.509	1.36732	0.400376	3.4151	0.000637597	0.00462445	17.3946	7.36199	16.7827	8.43734	3.28624	4.85846
smox	931.314	1.18675	0.259291	4.57692	4.71861e-06	6.44197e-05	9.85531	6.97855	7.81547	4.05183	3.61125	3.56008
smyd1b	113.75	5.99762	0.432554	13.8656	1.02359e-43	5.59829e-41	21.2382	29.9848	31.7144	0.381349	0.613913	0.335067
snai1b	123.058	3.73622	0.474862	7.86801	3.60326e-15	2.3544e-13	13.1568	14.9924	15.1785	1.14405	1.58895	0.62825
sntb1	95.7238	1.65278	0.397247	4.16057	3.17448e-05	0.000348273	12.0727	16.6795	15.343	3.57514	5.66967	5.31918
sntg2	33.5653	2.505	0.591254	4.23676	2.2677e-05	0.000259188	3.3508	2.33896	5.47083	1.04871	0.361125	0.62825
snx10a	170.136	1.0428	0.28724	3.63041	0.000282976	0.00233187	7.58859	5.59818	9.13176	4.38551	2.85289	3.97892
snx18b	38.6608	1.13401	0.377389	3.00489	0.00265678	0.0151829	2.16817	2.454	2.96165	0.762697	0.938926	1.88475
snx27b	234.483	-1.17195	0.333116	-3.51813	0.000434599	0.00336182	8.42629	6.01996	12.7927	19.5918	20.873	22.9939
snx4	978.116	-2.02779	0.202417	-10.0178	1.27242e-23	1.75606e-21	21.7802	25.3835	26.7371	99.5797	95.5177	117.148
soga1	969.482	1.20479	0.358252	3.36296	0.000771128	0.00544063	70.1205	78.3361	71.0797	31.3659	35.282	32.1664
sorbs2a	142.682	1.95504	0.31364	6.2334	4.56432e-10	1.49164e-08	9.16543	9.47089	10.2424	2.28809	2.70844	2.72242
sort1a	1214.17	-1.26414	0.206845	-6.11153	9.86783e-10	2.96175e-08	48.3895	36.6949	32.825	84.278	103.462	106.844
sostdc1a	21.1605	2.76249	0.498817	5.53809	3.05789e-08	6.78016e-07	5.76535	1.95553	4.27794	0.476686	0.397238	0.963316
sowahaa	34.082	-1.43171	0.398286	-3.59468	0.000324796	0.00262234	1.4783	1.11197	0.946084	2.95545	3.97238	2.93183
sox14	20.9134	2.8744	0.628556	4.57303	4.80718e-06	6.54264e-05	1.97106	2.53068	2.83825	0.190674	0.541688	0.293183
sox17	1271	6.7613	0.388403	17.408	7.18078e-68	2.12077e-64	30.7978	39.5707	41.9568	0.33368	0.361125	0.37695
sox21a	17.3189	-2.33369	0.692573	-3.36959	0.000752791	0.00533164	0.542042	0.345093	1.15175	6.10158	2.56399	1.84287
sox32	2884.04	1.17854	0.29737	3.96322	7.39466e-05	0.000730414	110.33	90.9895	100.326	40.0893	36.3653	61.8617
sox4a	260.977	-1.37945	0.356236	-3.87229	0.000107816	0.00101023	6.11029	6.51842	10.1601	35.0364	13.4339	12.2299
sox5	400.494	1.77824	0.205752	8.64266	5.49201e-18	4.85467e-16	38.3371	45.859	48.9084	14.4912	14.4089	11.2666
sox9a	146.266	1.06267	0.416111	2.5538	0.0106554	0.0465388	5.07548	7.51536	7.52754	3.05079	4.3335	2.59677
sp4	597.06	-1.19543	0.245794	-4.86353	1.15311e-06	1.82508e-05	21.3367	28.2209	18.3047	44.1411	62.9442	54.6996
sp5l	12672.3	1.24155	0.271279	4.57666	4.72449e-06	6.44197e-05	438.463	576.382	488.467	200.351	224.042	235.217
sp7	109.451	-1.69235	0.334026	-5.06653	4.05131e-07	7.08835e-06	3.69574	6.74849	7.2396	21.2125	18.2368	19.6852
spata20	147.026	1.23404	0.429347	2.87423	0.00405018	0.0214062	7.39148	6.90186	5.5531	2.81245	3.14179	2.80618
SPATA22	72.7129	3.50477	0.485839	7.21384	5.43961e-13	2.71374e-11	4.53344	4.71627	3.45526	0.381349	0.325013	0.460717
sphkap	13.5667	-1.68021	0.518018	-3.24354	0.00118056	0.00773784	0.295659	0.460124	0.658145	1.71607	1.33616	1.67533
spns3	117.425	1.01222	0.33986	2.97834	0.00289818	0.0162357	6.45523	7.70708	7.98001	3.52747	3.79182	4.06268
SPOCK1	27.7105	4.65772	0.838373	5.55567	2.76555e-08	6.18771e-07	2.5131	1.38037	1.19289	0.0953372	0.0361125	0.0837666
spon1b	37.4909	1.64105	0.423001	3.87956	0.000104647	0.000983658	1.08408	1.41872	1.19289	0.715029	0.14445	0.418833
spon2a	202.478	-1.35897	0.291532	-4.66148	3.13948e-06	4.45776e-05	6.45523	9.24083	8.43248	13.8716	29.9734	20.6485
spry1	352.914	1.14591	0.29144	3.93188	8.42856e-05	0.000814025	6.20884	6.86352	6.58145	3.3368	3.06957	2.80618
spry2	2264.67	1.16878	0.297531	3.92825	8.55664e-05	0.00082424	84.3121	100.959	87.739	47.7162	39.2543	38.6583
spry4	2013.82	1.96438	0.375183	5.23578	1.64287e-07	3.14661e-06	61.3	91.0279	75.8101	19.6395	23.5454	17.4235
sptb	25.9581	-3.12694	0.75278	-4.15386	3.26916e-05	0.000357333	1.08408	0.460124	0.617011	6.95961	6.46414	6.07308
src	87.8289	1.17779	0.42457	2.77407	0.00553601	0.0275741	3.1537	3.06749	2.34464	0.905703	1.55284	1.46592
srfb	63.371	1.87217	0.401074	4.66789	3.04309e-06	4.32506e-05	6.89871	7.51536	8.14455	1.90674	2.09453	2.38735
srpx	63.6154	-2.16188	0.510465	-4.23512	2.28428e-05	0.000260679	0.443489	0.306749	0.740413	2.33576	1.62506	2.93183
srrm4	39.1395	-1.67296	0.327883	-5.10232	3.35517e-07	6.03482e-06	1.42902	1.18865	1.85103	3.38447	5.59744	5.7799
st6galnac5b	28.6191	-1.66451	0.437553	-3.80413	0.000142302	0.0012884	2.06961	1.03528	2.46804	8.43734	4.73074	4.98411
stab2	98.7419	1.73214	0.342212	5.06161	4.15731e-07	7.24806e-06	3.79429	4.8313	2.67371	1.04871	0.866701	1.63345
stag1a	275.925	-2.16515	0.294158	-7.36048	1.83252e-13	9.63019e-12	10.7916	11.273	10.2424	44.1411	51.8215	54.5321
stc2a	359.446	1.30409	0.31851	4.09435	4.23347e-05	0.000446221	9.51037	11.8865	11.8877	4.33784	4.69463	4.94223
steap2	21.6671	-2.76095	0.45925	-6.01187	1.83394e-09	5.13885e-08	1.08408	0.536811	0.987218	4.76686	6.39192	7.07828
ston2	1003.47	-1.12009	0.154925	-7.22991	4.83322e-13	2.42763e-11	42.5256	45.7823	39.8589	86.6615	105.268	97.4206
stra6	33.1166	1.42212	0.474399	2.99774	0.00271994	0.0154339	1.87251	2.60737	1.31629	0.762697	0.613913	0.87955
stra6l	151.145	1.88029	0.296353	6.34475	2.22794e-10	7.75944e-09	21.7802	26.2271	35.4987	6.00624	8.19755	9.2981
strip2	29.4806	1.12333	0.414058	2.71298	0.00666805	0.0320214	2.21744	1.18865	1.11062	0.66736	0.794476	0.670133
stx12l	20.4645	1.48141	0.401104	3.69334	0.000221329	0.00189251	2.41455	3.83437	4.03114	1.23938	1.4445	1.13085
STX19	134.021	1.19953	0.440819	2.72114	0.00650576	0.031447	4.28706	3.91105	2.34464	1.62073	1.80563	1.34027
stx3a	276.139	1.43791	0.477272	3.01278	0.0025887	0.0148513	5.42042	4.29449	5.18289	1.57306	2.20287	1.92663
stx6	2040.15	-1.31303	0.149468	-8.78471	1.56766e-18	1.4745e-16	74.9496	81.1736	85.7645	194.583	212.306	216.244
STXBP6_(2_of_2)	963.539	1.78703	0.201241	8.88005	6.68323e-19	6.40852e-17	42.9691	61.2348	46.8517	13.2519	14.8061	17.3816
sulf1	1123.01	1.58204	0.292756	5.40395	6.51883e-08	1.36351e-06	75.9844	94.8239	79.0597	28.7442	32.4291	25.3813
sulf2b	43.744	3.54934	0.665306	5.3349	9.5596e-08	1.94636e-06	4.63199	1.18865	3.37299	0.429017	0.14445	0.2513
sult1st1	8.46182	-4.12118	1.00013	-4.12066	3.77783e-05	0.00040602	0.0492765	0.115031	0.0411341	1.71607	1.04726	1.0052
suv39h1a	120.87	1.02048	0.349856	2.91685	0.00353581	0.0191257	6.94799	4.25615	3.53753	2.09742	2.34732	3.09937
svilb	8.28113	-1.92789	0.630645	-3.05701	0.00223557	0.013215	0.640595	0.383437	0.20567	1.85907	1.7334	1.21462
SYCE3	120.168	2.03419	0.402653	5.05196	4.3731e-07	7.59737e-06	3.00587	2.87578	6.86939	1.38239	1.08338	0.7539
syne1a	212.243	1.24393	0.409152	3.04027	0.00236369	0.0138126	7.68714	7.05524	8.67929	3.38447	4.26128	2.59677
SYNE2_(2_of_2)	11.4662	-1.55189	0.54409	-2.85226	0.00434092	0.022659	0.443489	0.383437	0.452475	1.28705	1.33616	1.2565
syne3	643.644	-1.36139	0.202176	-6.73372	1.65378e-11	6.72764e-10	27.3977	30.3298	27.3542	67.022	85.6228	74.4267
sypb	81.7934	1.12448	0.345568	3.25399	0.00113795	0.00751189	2.36527	4.25615	6.04671	1.57306	2.05841	2.38735
sypl2a	1256.21	1.46785	0.255523	5.74452	9.2182e-09	2.26875e-07	82.686	77.876	95.4722	29.2208	42.6128	24.2086
sypl2b	453.914	1.59378	0.182502	8.73296	2.4809e-18	2.27549e-16	19.07	15.1458	23.9812	6.57826	6.71693	6.65945
sytl4	169.37	1.7107	0.370906	4.61223	3.9838e-06	5.56038e-05	4.53344	4.63958	3.94887	0.858034	1.69729	1.59157
szl	3834.12	-1.51794	0.479502	-3.16566	0.0015473	0.00967357	124.177	135.43	107.689	442.65	289.875	354.668
ta	24144.2	1.81434	0.42802	4.23891	2.2461e-05	0.000257117	268.163	289.188	267.988	86.6615	86.1645	70.2802
TACC2	210.621	1.12582	0.391367	2.87663	0.00401943	0.0212971	4.38561	6.36505	4.89495	2.86011	3.39458	1.17273
tagln3b	130.858	2.85493	0.50061	5.70291	1.1778e-08	2.84657e-07	7.88424	8.7807	7.98001	1.90674	1.11949	0.5026
tango6	487.46	-1.13688	0.177469	-6.40606	1.49327e-10	5.30073e-09	15.7192	19.9387	16.9061	34.5597	46.4046	39.1609
tap1	32.1036	1.32575	0.408819	3.24288	0.00118328	0.00774682	1.03481	1.15031	1.52196	0.429017	0.361125	0.7539
TAPBP_(1_of_2)	143.147	1.89151	0.450476	4.19891	2.68204e-05	0.000300956	6.3074	3.25921	2.83825	1.23938	0.938926	1.29838
tbc1d25	51.9473	1.42981	0.382082	3.74216	0.000182446	0.00160177	4.38561	5.21474	2.0567	1.14405	1.84174	1.5078
tbc1d32	298.223	1.41142	0.294274	4.79628	1.61643e-06	2.47356e-05	18.5773	19.7853	18.7983	6.00624	8.81146	7.49711
tbx1	1304.25	6.31158	0.412039	15.3179	5.80414e-53	5.35686e-50	17.4439	22.7761	20.1557	0.381349	0.252788	0.167533
tbx16	10057.1	2.78694	0.313798	8.88132	6.60743e-19	6.37725e-17	321.924	387.386	348.118	57.0593	60.3802	41.2551
tbx2a	21.4855	-2.42112	0.754763	-3.20778	0.00133762	0.00858812	0.443489	0.460124	0.575877	4.19484	1.4445	2.513
tbx6	286.549	8.0509	0.761443	10.5732	3.96646e-26	6.50808e-24	13.896	12.0783	16.6182	0.143006	0	0.0418833
tbx6l	857.309	4.21762	0.596288	7.07312	1.51489e-12	7.14708e-11	147.386	165.721	143.599	11.1544	11.8449	2.38735
TCAIM	26.4593	-1.37441	0.488983	-2.81076	0.00494247	0.02515	0.985531	1.72547	0.781547	3.14613	3.61125	2.68053
TCERG1L	8.04579	2.70051	0.96863	2.78797	0.00530399	0.0266137	1.18264	1.4954	1.31629	0.524354	0.0361125	0.0837666
tcf15	274.122	4.27777	0.499252	8.56836	1.04967e-17	8.85743e-16	11.6293	13.3436	28.0123	1.52539	0.505576	0.795783
tdh	6704.65	1.01601	0.125761	8.0789	6.53521e-16	4.5955e-14	222.434	312.348	263.793	142.195	135.566	131.179
tdrd12	127.953	1.63125	0.369135	4.41912	9.91018e-06	0.000125509	8.08135	4.67793	5.88217	1.71607	2.38343	2.13605
tdrd7b	18.9303	-2.30419	0.713909	-3.22757	0.00124847	0.00810026	0.197106	0.383437	0.575877	1.14405	2.05841	2.7643
tdrd9	620.995	1.65348	0.338267	4.8881	1.01813e-06	1.63421e-05	36.3661	28.566	27.8889	8.43734	17.0451	5.23541
tek	79.6803	1.16018	0.399707	2.90257	0.00370112	0.0198816	5.22331	5.36811	8.51475	2.62177	3.79182	2.42923
tex36	64.6749	-1.8586	0.408219	-4.55295	5.28992e-06	7.1339e-05	1.03481	1.15031	0.575877	2.95545	3.1779	4.2721
tfap2c	4991.31	-1.24914	0.266078	-4.69464	2.67075e-06	3.84396e-05	190.405	173.735	163.919	379.156	463.577	461.973
tfb1m	51.8682	1.50267	0.325361	4.61848	3.86569e-06	5.42115e-05	3.1537	3.3359	3.08506	1.28705	1.33616	0.87955
tfec	43.1224	1.36926	0.463468	2.95438	0.00313295	0.0173926	7.93352	7.59205	6.74599	1.90674	2.70844	4.35587
tfr1b	321.105	1.18479	0.307572	3.85207	0.000117123	0.00108165	33.0645	36.3881	33.1129	16.97	17.5868	12.188
tg	69.9595	1.23913	0.425583	2.91159	0.0035959	0.0193869	3.49863	5.4448	3.00279	1.52539	2.05841	1.67533
tgfbi	128.397	1.30484	0.296551	4.40007	1.08218e-05	0.000135773	4.73055	5.86658	6.41692	2.81245	2.52788	1.80098
tgm1	146.745	-1.95038	0.346705	-5.62547	1.85e-08	4.28197e-07	3.89285	5.94327	4.60702	17.685	15.6006	24.6693
tgm1l4	368.233	-3.45448	0.65212	-5.29731	1.17523e-07	2.32947e-06	8.37701	9.81598	2.42691	89.1879	63.7747	82.0075
tgm2b	374.632	-4.41016	0.346912	-12.7126	5.03252e-37	1.81257e-34	1.72468	1.30368	2.26237	33.797	50.5937	32.1664
thap1	151.833	-1.21746	0.208971	-5.82598	5.67777e-09	1.45815e-07	3.64646	3.41259	3.82547	8.67568	10.6893	6.82698
thrb	39.344	-1.36707	0.455546	-3.00094	0.00269149	0.0153575	0.640595	0.498468	1.23402	2.09742	1.51673	2.72242
thsd7ab	31.0563	2.54433	0.513734	4.95262	7.32198e-07	1.21215e-05	1.92178	1.72547	2.63258	0.476686	0.469463	0.167533
tie1	168.642	2.8025	0.550815	5.08792	3.62013e-07	6.41759e-06	2.56238	1.4954	2.42691	0.381349	0.252788	0.335067
TIFA	891.065	1.25092	0.204903	6.10492	1.02852e-09	3.06831e-08	20.0555	21.3574	21.472	11.1544	7.7642	8.46043
tjp2b	143.053	2.03813	0.252131	8.08363	6.28689e-16	4.44203e-14	10.2495	7.47702	9.37857	1.6684	2.34732	2.80618
tlx3b	12.6103	-2.2619	0.620655	-3.64437	0.000268043	0.0022262	0.295659	0.613499	0.534743	2.47877	2.0223	2.72242
TMC8	15.8753	5.35291	0.927135	5.77361	7.75923e-09	1.93222e-07	1.08408	1.41872	2.38578	0.0476686	0.0361125	0.0418833
tmed7	2678.54	1.02479	0.212853	4.81452	1.47553e-06	2.27682e-05	104.516	92.1398	110.651	57.0593	43.1184	56.0399
tmem120a	335.739	2.48348	0.420641	5.90403	3.54719e-09	9.50659e-08	2.5131	1.91718	2.38578	0.619692	0.2889	0.37695
tmem132e	1659.9	-1.13512	0.150297	-7.55253	4.26893e-14	2.43395e-12	58.8362	77.6459	65.6911	136.38	170.451	154.298
TMEM14A	31.8124	1.84873	0.590204	3.13235	0.00173412	0.0106371	3.1537	1.15031	1.97444	0.810366	0.577801	0.418833
tmem14ca	41.3823	1.02232	0.389672	2.62353	0.00870242	0.039749	3.44936	1.80215	2.92052	1.62073	1.40839	1.13085
tmem14cb	46.2636	-2.05663	0.488213	-4.21257	2.52486e-05	0.000284398	0.591318	1.11197	0.575877	4.0995	2.6001	3.18313
tmem151a	44.0489	1.57538	0.44006	3.57993	0.000343691	0.00274339	1.4783	1.95553	1.85103	0.66736	0.43335	0.7539
tmem173	383.652	1.84849	0.363641	5.08329	3.70948e-07	6.56023e-06	23.2092	22.4694	15.4253	5.95857	6.39192	5.2773
tmem176l.1	495.307	1.88284	0.21023	8.9561	3.36362e-19	3.3336e-17	27.1021	25.1151	34.6349	9.62905	6.78916	7.95783
tmem18	498.404	-1.08523	0.332862	-3.26031	0.00111291	0.00736967	16.9018	12.6534	18.0167	17.685	49.4381	38.1976
tmem260	203.929	2.73953	0.338868	8.08435	6.24955e-16	4.43688e-14	10.2988	12.0399	11.5175	0.953372	2.27509	2.0104
tmem30aa	647.828	-1.05206	0.150106	-7.00877	2.40422e-12	1.09577e-10	21.1396	18.4817	18.3869	35.1794	46.9463	42.721
tmem35	940.879	-1.00108	0.247151	-4.05046	5.11166e-05	0.000525654	36.0704	38.152	40.5582	66.879	96.6372	75.1387
tmem56a	56.8668	2.17162	0.453914	4.78421	1.71658e-06	2.6079e-05	2.56238	1.8405	1.9333	0.238343	0.613913	0.586366
TMEM63B	24.8677	-1.0247	0.377211	-2.71651	0.00659738	0.0317858	0.886977	0.958592	1.43969	1.71607	2.74455	2.47112
TMEM74_(2_of_2)	40.1184	-1.20251	0.381195	-3.15459	0.00160726	0.00999354	2.71021	1.68712	1.6865	5.0052	4.18905	5.2773
tmem82	12.8357	2.00634	0.615988	3.25711	0.00112553	0.00743658	2.16817	2.76074	2.92052	0.286011	0.938926	0.795783
tmem88a	14.6296	4.24707	0.805583	5.27204	1.34915e-07	2.63181e-06	1.37974	1.64878	2.30351	0.0953372	0.0722251	0.12565
tmprss15	18.578	-3.40528	0.831694	-4.09439	4.23278e-05	0.000446221	0.0492765	0.460124	0.20567	1.38239	3.57514	3.09937
tmtopsb	245.142	2.80298	0.342474	8.18452	2.73394e-16	2.04934e-14	15.4236	12.8835	19.5387	1.6684	3.61125	1.80098
tmx4	180.575	1.50504	0.239932	6.27278	3.54664e-10	1.1903e-08	6.40595	5.78989	7.2396	1.76374	2.74455	2.55488
TNC_(2_of_2)	136.399	2.33419	0.472861	4.9363	7.96185e-07	1.30058e-05	3.94212	2.79909	7.65094	0.810366	1.37228	0.7539
tnfaip2a	69.3132	-2.58372	0.532653	-4.85067	1.23043e-06	1.93501e-05	1.97106	2.03221	2.18011	15.1109	7.87253	15.2874
tnfaip2b	122.044	-2.41775	0.399623	-6.05008	1.44775e-09	4.18375e-08	5.32186	5.32977	8.59702	47.2396	36.1848	22.4495
tnfaip6	259.616	2.54199	0.42168	6.02825	1.65745e-09	4.70685e-08	3.40008	2.18559	3.12619	0.66736	0.43335	0.460717
tnfrsfa	223.688	1.28012	0.312486	4.09657	4.19318e-05	0.00044324	5.22331	4.2178	4.93609	2.09742	1.98619	2.05228
tnfsf10l	589.656	1.1539	0.179393	6.43226	1.25717e-10	4.51696e-09	6.01174	7.01689	7.03393	2.52643	3.25013	3.56008
tnr	47.389	1.42314	0.561258	2.53562	0.0112249	0.0482814	4.04068	2.07056	3.33186	0.905703	1.1556	1.59157
tnrc5	383.505	2.37006	0.358377	6.6133	3.75848e-11	1.44535e-09	25.0818	12.385	16.0834	3.90882	4.11683	2.72242
tnrc6c2	94.9416	-1.20186	0.315967	-3.80376	0.000142514	0.00128952	5.27259	3.75768	4.40135	8.81869	12.6394	10.5965
tns1b	194.051	1.17435	0.356971	3.28975	0.00100275	0.00673993	1.82323	4.29449	2.67371	1.09638	1.7334	1.21462
tns2b	28.3883	1.44399	0.378823	3.8118	0.00013796	0.0012537	1.62613	1.8405	1.43969	0.381349	0.758363	0.712016
tob1a	2383.75	1.82647	0.227711	8.021	1.0489e-15	7.23789e-14	129.893	160.2	144.586	42.0437	46.7657	38.2395
topaz1	138.049	-2.13138	0.304542	-6.99865	2.58442e-12	1.17068e-10	3.3508	3.3359	4.93609	9.77206	20.4758	22.7426
tor3a	273.319	2.43563	0.35858	6.79244	1.10252e-11	4.59913e-10	30.2558	34.471	32.7839	5.81557	6.17524	6.70133
tp53bp2b	606.42	1.14741	0.255984	4.48233	7.3832e-06	9.64847e-05	7.88424	9.81598	9.70764	3.47981	4.94742	4.39775
tp53inp2	2595.99	1.1692	0.283601	4.12269	3.74467e-05	0.000402749	110.577	81.4036	131.464	55.7722	41.9628	50.8045
tp63	1799.82	-1.43042	0.338418	-4.22678	2.37062e-05	0.00026887	49.2765	54.1029	45.4943	138.43	146.87	130.969
tph1b	1320.74	4.66536	0.451636	10.3299	5.16039e-25	7.85604e-23	14.0931	18.4433	14.3969	0.619692	0.830588	0.460717
tprkb	164.071	-1.03779	0.305979	-3.39169	0.000694628	0.00497699	5.02621	4.44787	6.74599	15.5876	8.59478	10.1358
tpte	419.854	1.696	0.263687	6.43186	1.26053e-10	4.51801e-09	22.7658	19.5553	39.0774	9.67672	7.33085	8.92115
TRABD2A	203.813	1.88911	0.317867	5.94309	2.79694e-09	7.67704e-08	2.02034	2.22393	3.37299	0.953372	0.505576	0.712016
traf4a	428.563	1.83821	0.401643	4.57674	4.72286e-06	6.44197e-05	15.325	17.2163	20.8138	5.10054	6.78916	3.56008
trim108	53.0716	-1.4212	0.361947	-3.92656	8.61702e-05	0.000828974	1.23191	0.805217	1.02835	2.52643	4.15294	1.7591
TRIM14_(22_of_27)	93.5959	-1.33638	0.446684	-2.99178	0.00277356	0.0156589	1.6754	2.99081	0.493609	4.14717	2.63622	6.82698
TRIM14_(2_of_27)	121.313	2.82952	0.48033	5.8908	3.84342e-09	1.02079e-07	3.69574	4.48621	14.1501	1.19171	1.11949	0.921433
trim25	121.434	1.04519	0.334234	3.12713	0.00176521	0.0107982	6.75088	5.94327	7.11619	3.90882	3.14179	2.88995
trim35-7	1459.71	1.76491	0.274616	6.42681	1.30309e-10	4.65925e-09	64.503	70.3606	65.1152	16.6363	21.3786	23.1196
triqk	258.422	1.38264	0.336561	4.10814	3.98853e-05	0.000425568	16.1627	6.25002	9.50197	5.62489	4.11683	2.93183
tsku	735.046	1.51196	0.321816	4.6982	2.62464e-06	3.78496e-05	40.7517	40.2992	37.4731	14.0146	13.2172	15.8738
tspan18b	628.306	1.54062	0.220498	6.987	2.80823e-12	1.2643e-10	21.8295	24.0798	27.313	10.6778	7.33085	8.0416
tspan2a	117.716	-1.19831	0.273802	-4.37654	1.20581e-05	0.000149255	4.87838	3.83437	4.48361	10.6778	11.4477	9.21433
tspan4b	140.763	-1.00389	0.314832	-3.18864	0.00142942	0.00903992	2.75949	1.07362	1.52196	3.76582	3.97238	3.2669
TTC16	43.5696	3.25591	0.500942	6.49956	8.05533e-11	2.9592e-09	2.11889	2.53068	2.34464	0.0476686	0.469463	0.209417
ttc19	161.8	2.32532	0.216665	10.7323	7.17712e-27	1.34158e-24	8.47556	10.2378	10.1601	1.57306	2.23898	2.13605
ttc25	74.3106	3.15232	0.522279	6.0357	1.58273e-09	4.52074e-08	1.82323	1.4954	1.97444	0.190674	0.252788	0.167533
ttll11	43.9762	-1.22308	0.46536	-2.62825	0.00858244	0.0392983	0.739148	1.68712	1.6865	2.33576	3.86404	3.81138
ttll5	69.0635	1.36211	0.471076	2.8915	0.00383409	0.0204956	4.08995	3.52762	3.12619	1.00104	1.37228	1.96852
ttna	196.455	1.85038	0.439151	4.21354	2.51398e-05	0.000283605	20.7454	17.3697	23.4053	4.57618	6.8975	6.24061
ttpal	117.159	-1.03631	0.222667	-4.65406	3.25464e-06	4.60799e-05	2.61166	3.02915	3.57866	6.00624	7.25862	6.36626
ttyh2l	86.1036	-2.44904	0.524324	-4.67086	2.99944e-06	4.26713e-05	1.52757	2.41565	2.26237	14.3006	9.28092	11.4341
tuba1a	1367.1	-1.14185	0.282021	-4.0488	5.14803e-05	0.000527924	62.8276	71.7027	60.3437	129.516	157.523	159.743
tuba2	28.7773	-1.21311	0.369486	-3.28323	0.00102624	0.00687591	1.42902	0.958592	0.822681	2.86011	1.84174	2.97372
tuba8l2	8252.45	1.94349	0.31661	6.13846	8.33273e-10	2.55289e-08	291.126	223.812	233.395	83.134	57.5995	60.4376
tuft1b	65.9035	1.30819	0.436308	2.99831	0.00271478	0.0154308	6.5045	6.36505	5.4297	1.76374	3.06957	2.84807
tulp4a	261.431	-1.04392	0.250877	-4.16111	3.16707e-05	0.000347977	11.2843	17.2547	13.1629	22.4519	36.4737	30.5748
twist1a	399.694	7.73738	0.569762	13.58	5.26077e-42	2.67882e-39	34.6414	29.1412	37.8845	0.143006	0.180563	0.167533
twist2	3014.92	5.66478	0.665835	8.50777	1.77307e-17	1.48767e-15	22.273	19.4786	26.079	0.524354	0.361125	0.5026
tysnd1	25.4638	-1.09328	0.375807	-2.90916	0.00362404	0.0195101	1.28119	0.958592	1.89217	2.4311	3.79182	2.88995
uba7	23.521	1.50448	0.490374	3.06803	0.00215475	0.0127993	1.03481	1.227	1.31629	0.0953372	0.722251	0.460717
UBE2O	73.9125	-1.17824	0.280687	-4.1977	2.69638e-05	0.000302335	2.41455	3.83437	4.03114	7.5793	8.01698	8.58608
ube2o	31.1086	-1.00282	0.270653	-3.70517	0.000211248	0.00181793	1.37974	1.57209	1.72763	3.14613	3.25013	3.35067
ubl7a	32.091	1.45335	0.517421	2.80883	0.00497214	0.0252746	1.77395	1.15031	2.18011	0.858034	0.2889	0.795783
uchl1	378.048	1.71517	0.48348	3.54756	0.000388823	0.00305637	47.1576	9.01076	13.492	7.48397	6.64471	7.99971
uchl5	1737.8	1.07977	0.147444	7.32321	2.42107e-13	1.25445e-11	67.2132	53.7962	61.4132	33.654	26.6149	29.1089
uckl1b	40.3979	1.0621	0.402824	2.63664	0.00837324	0.0385195	1.28119	1.34203	1.48083	0.476686	0.794476	0.7539
ugdh	5473.89	1.42202	0.294951	4.82119	1.42702e-06	2.21353e-05	90.3732	62.0784	68.2003	26.5514	26.2177	32.7528
ugt5a4	78.8318	-1.79166	0.371106	-4.8279	1.37981e-06	2.14933e-05	4.04068	2.26228	2.92052	10.7254	11.0504	11.2666
ugt5a5	26.787	-2.00422	0.4589	-4.36745	1.25707e-05	0.00015423	1.42902	1.227	1.56309	5.24354	6.13913	6.15685
ugt5b2	52.9191	2.45957	0.461694	5.32729	9.96917e-08	2.01664e-06	1.18264	1.03528	1.06949	0.143006	0.216675	0.2513
ugt8	214.918	-1.10933	0.324807	-3.41535	0.000637011	0.00462248	11.9249	4.94633	5.5531	15.4446	19.1396	15.6644
ulk2	149.505	2.27371	0.417285	5.4488	5.07099e-08	1.08057e-06	9.51037	9.35586	8.47362	1.23938	2.20287	2.42923
unc5b	1711.76	-1.04246	0.242962	-4.29061	1.78187e-05	0.000211178	108.556	111.58	100.491	206.739	245.493	233.709
unc5da	117.126	3.02189	0.454129	6.65426	2.84722e-11	1.10642e-09	4.33633	4.86965	1.8099	0.381349	0.758363	0.2513
unc93b1	126.775	3.13031	0.428205	7.31029	2.66559e-13	1.36676e-11	5.37114	7.01689	5.71764	0.905703	0.541688	0.712016
uncx4.1	117.43	1.77327	0.510935	3.47064	0.000519225	0.00389331	1.72468	1.87884	2.30351	0.619692	0.505576	0.670133
upk3b	16.5713	-1.68645	0.483544	-3.48769	0.000487221	0.00369343	0.443489	0.881904	0.740413	1.85907	2.45565	2.63865
usb1	80.0285	-2.19074	0.241493	-9.07165	1.17229e-19	1.21057e-17	1.08408	1.38037	1.8099	7.91298	5.95857	6.49191
usp48	726.768	1.6962	0.201977	8.398	4.54165e-17	3.62522e-15	58.0477	61.7717	57.8345	14.3959	25.4955	17.0884
VAV3_(1_of_3)	23.5518	1.54182	0.404166	3.81481	0.000136286	0.00123924	2.56238	3.83437	6.04671	1.62073	1.62506	1.17273
vcana	298.073	1.60501	0.264225	6.07443	1.24429e-09	3.64573e-08	27.5949	41.6029	42.3681	12.5368	10.256	15.1618
vcpkmt	316.679	1.16389	0.193042	6.02922	1.64757e-09	4.68779e-08	14.6844	15.3758	22.6649	9.91506	7.40307	7.0364
vegfaa	145.401	1.63491	0.555409	2.94361	0.00324411	0.0178354	1.08408	1.61043	1.97444	0.429017	0.541688	0.586366
vegfab	111.438	1.90937	0.311963	6.12051	9.32771e-10	2.82838e-08	3.25225	3.18252	3.41413	0.953372	1.04726	0.712016
vgll4l	1549.63	-1.02213	0.38547	-2.65165	0.00800987	0.0371255	20.3512	14.3405	14.8083	38.8976	29.7928	35.4333
vim	115.818	1.19099	0.264531	4.50227	6.72324e-06	8.83293e-05	6.89871	8.81904	8.18568	3.38447	3.50292	3.97892
vps39	437.475	1.44434	0.224412	6.4361	1.22582e-10	4.4367e-09	18.183	26.3421	21.5954	7.4363	9.89484	7.87406
VWA5A_(2_of_4)	726.579	-1.42698	0.291986	-4.88714	1.0231e-06	1.6404e-05	37.2038	58.2057	24.9684	112.879	117.799	105.755
waif2	33.8598	-3.49738	0.547757	-6.38491	1.71503e-10	6.05881e-09	0.640595	0.575155	0.946084	7.38863	10.4726	7.45523
wasf3b	2789.51	1.17113	0.160117	7.31423	2.5886e-13	1.33191e-11	49.0794	56.9787	53.2686	25.0737	26.1455	22.1144
wbscr16	664.392	1.55589	0.412938	3.76786	0.000164653	0.00146472	47.6011	36.6566	78.5661	19.0674	18.8507	19.2663
wdfy4	224.005	-2.21572	0.320421	-6.91503	4.67778e-12	2.03766e-10	9.90458	7.36199	8.06228	37.8489	35.282	48.8778
wdr47b	280.287	-2.59647	0.255378	-10.1672	2.77909e-24	3.98436e-22	7.93352	4.79296	8.76156	38.8499	48.1019	47.6213
wdr54	81.018	-1.00897	0.248039	-4.06779	4.74618e-05	0.000491838	2.21744	1.68712	2.46804	4.62385	3.25013	5.40295
wif1	39.0155	4.42067	0.542676	8.14606	3.75962e-16	2.73489e-14	3.94212	3.68099	6.78712	0.190674	0.2889	0.209417
wnt1	27.6158	-2.02542	0.566111	-3.57777	0.000346535	0.00276013	0.788424	1.11197	1.72763	8.15133	3.4668	3.56008
wnt4a	49.8008	2.07314	0.394077	5.26075	1.4347e-07	2.78399e-06	3.1537	3.56596	1.72763	0.476686	0.722251	0.87955
wnt8a	3214.5	1.24562	0.353517	3.52351	0.000425872	0.00330297	237.809	248.62	244.213	122.985	96.7455	98.8446
WSCD1_(2_of_2)	29.5516	1.51359	0.438563	3.45124	0.000558007	0.00413037	1.37974	1.95553	1.8099	0.762697	0.613913	0.5026
wu:fc75a09	135.202	-1.94669	0.528558	-3.68303	0.000230478	0.00195602	5.81463	5.29143	3.04392	14.0622	19.7174	23.1196
wu:fl09a04	90.4896	1.6602	0.264053	6.28736	3.22905e-10	1.09115e-08	4.43489	5.36811	3.94887	0.905703	1.69729	1.88475
wwox	88.7306	1.47047	0.278733	5.27555	1.32355e-07	2.59216e-06	5.81463	4.52455	4.03114	2.14509	1.37228	1.88475
xirp1	28.224	1.67585	0.645299	2.59701	0.00940381	0.0421922	2.80876	1.95553	2.34464	1.04871	0.794476	0.460717
XKR5_(1_of_2)	386.197	1.13414	0.205376	5.52224	3.34698e-08	7.37684e-07	59.4768	83.4742	83.2142	30.2695	40.8072	35.8102
xkr9	66.1483	1.37782	0.489679	2.81371	0.00489732	0.0249633	1.28119	2.60737	1.06949	0.619692	0.577801	0.795783
zbtb12.1	36.9618	-1.60122	0.498847	-3.20985	0.00132802	0.00854135	0.837701	1.41872	1.27516	2.24042	4.08072	4.85846
zbtb16b	113.496	-1.62308	0.45101	-3.59877	0.000319722	0.00258987	6.70161	7.59205	9.4197	32.8437	21.1258	21.2767
zbtb49	182.27	-1.20355	0.24009	-5.01292	5.36107e-07	9.12061e-06	8.13063	8.01383	8.84383	15.4923	22.9676	21.3186
zcchc24	185.512	5.79882	0.410985	14.1095	3.31705e-45	2.12969e-42	18.0352	18.52	23.323	0.33368	0.361125	0.418833
zcchc4	17.4628	-1.1036	0.425049	-2.59641	0.00942037	0.0422315	0.542042	0.72853	0.658145	1.28705	1.48061	1.54968
zdhhc3a	292.761	2.06493	0.328065	6.29425	3.08884e-10	1.04857e-08	9.90458	16.4878	8.18568	3.05079	3.10568	2.42923
zer1	694.027	-1.0198	0.183675	-5.55221	2.82085e-08	6.30189e-07	29.6645	37.155	33.9767	60.3484	82.2283	69.7357
zfand5a	5297.09	1.15638	0.202846	5.70078	1.19261e-08	2.87765e-07	104.86	122.7	98.0636	50.9577	52.616	47.9564
ZFP36	987.945	1.2715	0.211849	6.00194	1.94975e-09	5.41201e-08	54.6969	55.3299	48.6205	21.2602	25.3149	21.6537
zgc:100832	243.986	-1.56142	0.321587	-4.85537	1.20163e-06	1.89577e-05	4.58272	7.20861	4.11341	15.397	18.0202	15.4131
zgc:101000	4974.88	1.05151	0.311444	3.37623	0.000734869	0.00522475	341.24	232.746	296.906	213.365	91.3286	127.702
zgc:101040	20.3358	1.84925	0.515752	3.58553	0.000336392	0.00269388	4.23778	3.9494	5.47083	1.57306	1.01115	1.34027
zgc:101100	47.124	-1.80651	0.44181	-4.08888	4.33469e-05	0.00045559	2.21744	2.53068	3.90774	12.6322	10.4004	8.20913
zgc:101744	651.261	1.01852	0.299525	3.40044	0.000672781	0.00484868	66.9668	44.3253	56.1069	43.5214	21.3425	20.2296
zgc:110239	2385.73	1.04091	0.301176	3.45615	0.000547949	0.00406407	141.916	118.06	108.594	70.4065	57.9606	57.2126
zgc:110699	194.6	1.18692	0.192357	6.17041	6.81136e-10	2.14922e-08	26.3137	26.1887	29.7811	14.7296	11.9171	10.764
zgc:110843	98.5896	1.25672	0.289975	4.33391	1.46484e-05	0.000176781	3.79429	4.79296	4.31908	1.33472	1.87785	2.38735
zgc:111983	19.978	-3.7077	0.637663	-5.8145	6.08146e-09	1.55103e-07	0.295659	0.345093	0.658145	5.29121	6.93361	5.40295
zgc:113054	395.801	1.30304	0.328938	3.96136	7.4524e-05	0.000734643	24.0962	19.4786	18.4692	9.77206	7.36696	8.92115
zgc:113162	116.967	1.94403	0.245155	7.92981	2.19479e-15	1.45339e-13	5.6668	6.36505	7.77434	1.6684	1.62506	2.05228
zgc:113274	110.861	2.97013	0.365038	8.1365	4.06865e-16	2.94518e-14	5.91318	6.36505	11.4764	1.00104	0.722251	1.42403
zgc:113298	41.7211	-2.23073	0.378537	-5.89305	3.79139e-09	1.00994e-07	0.788424	1.34203	1.02835	3.00312	5.27243	7.24581
zgc:113314	79.521	1.32506	0.422568	3.13572	0.0017143	0.0105436	4.58272	3.75768	4.07227	2.5741	1.55284	1.0052
zgc:113397	75.9879	4.02351	0.485224	8.29205	1.11312e-16	8.65128e-15	2.02034	2.1089	3.00279	0.0953372	0.0361125	0.335067
zgc:113418	165.052	-1.06458	0.252948	-4.20871	2.56833e-05	0.000288635	3.89285	3.9494	5.22403	8.24666	9.7865	10.3033
zgc:113425	72.6158	1.66779	0.494512	3.3726	0.000744624	0.00527886	9.46109	6.74849	6.45805	3.00312	2.13064	2.2617
zgc:113516	42.6652	4.01017	0.652551	6.14537	7.9775e-10	2.46968e-08	1.42902	1.15031	3.12619	0.0953372	0.216675	0.0418833
zgc:113691	43.7593	-1.75765	0.357668	-4.91419	8.91492e-07	1.44826e-05	0.837701	0.805217	0.781547	2.62177	3.14179	2.72242
zgc:114037	1615.43	1.32044	0.442683	2.98281	0.00285611	0.0160549	134.229	63.8039	99.8324	55.3909	28.2039	39.496
zgc:114118	492.83	-1.35393	0.323584	-4.18415	2.86232e-05	0.000319601	17.5917	24.4249	24.2691	56.8209	56.48	62.1548
zgc:123068	337.872	1.22992	0.450284	2.73144	0.00630589	0.0307121	15.6207	6.82517	12.7516	6.43526	4.76686	4.31398
zgc:123217	40.2635	1.17558	0.440104	2.67115	0.00755925	0.0354148	1.72468	1.11197	1.39856	0.715029	0.758363	0.460717
zgc:123297	14.4653	-1.85427	0.475293	-3.90132	9.56702e-05	0.000908528	0.394212	0.690186	0.246804	1.52539	1.84174	1.67533
zgc:136254	40.3886	2.39985	0.465749	5.15267	2.56801e-07	4.74616e-06	1.92178	1.11197	2.75598	0.572023	0.325013	0.2513
zgc:136336	66.5002	1.02778	0.356533	2.88269	0.00394291	0.020982	1.13336	1.227	1.27516	0.572023	0.686138	0.586366
zgc:136791	157.1	1.4224	0.275931	5.15492	2.53744e-07	4.70142e-06	5.81463	10.9279	9.5431	3.86115	3.1779	3.14125
zgc:136870	61.5817	-1.26805	0.383395	-3.30742	0.000941596	0.0063929	2.95659	2.53068	4.36021	7.38863	7.94476	9.21433
zgc:152891	60.2257	5.49441	0.871858	6.30195	2.93924e-10	1.00705e-08	1.28119	2.26228	3.78433	0.143006	0.0361125	0
zgc:152968	404.004	4.43608	0.640074	6.93057	4.19159e-12	1.84218e-10	18.8729	32.6305	29.5754	1.14405	1.22783	1.5078
zgc:153039	214.539	1.35375	0.300897	4.49904	6.82604e-06	8.96001e-05	25.2789	14.5323	26.2847	10.8208	9.24481	6.65945
zgc:153896	58.2379	-1.71072	0.307222	-5.56835	2.57164e-08	5.78013e-07	1.6754	1.18865	2.18011	6.57826	4.22517	6.24061
zgc:154093	13.5209	-1.58653	0.615034	-2.57958	0.00989198	0.0438927	0.591318	0.498468	0.822681	2.00208	2.34732	1.59157
zgc:158328	149.746	2.29175	0.89776	2.55274	0.0106878	0.046633	2.06961	1.8405	2.92052	0.476686	0.505576	0.460717
zgc:158340	33.1984	1.51463	0.454978	3.32902	0.000871521	0.00599343	1.72468	2.41565	2.83825	0.619692	1.22783	0.670133
zgc:158343	219.684	1.39907	0.227341	6.15406	7.55254e-10	2.35292e-08	9.60892	7.82211	10.5303	4.71919	2.78067	3.5182
zgc:158689	98.6079	-2.04308	0.360818	-5.66236	1.49309e-08	3.52775e-07	3.05514	2.14725	2.50918	11.4405	10.1115	11.3085
zgc:162184	36.0106	2.40914	0.491198	4.90463	9.36035e-07	1.51562e-05	1.62613	1.15031	2.42691	0.238343	0.505576	0.2513
zgc:162297	34.6653	2.2814	0.546252	4.17647	2.9607e-05	0.000327741	1.92178	1.26534	1.85103	0.572023	0.14445	0.37695
zgc:162358	87.448	-1.07352	0.315262	-3.40516	0.000661255	0.00477494	2.41455	3.29756	1.76877	5.24354	5.23632	5.90555
zgc:163030	518.396	1.19902	0.418504	2.86502	0.00416986	0.0219211	17.3946	9.70095	20.8138	7.76998	5.20021	8.58608
zgc:171220	150.987	1.55351	0.350999	4.42597	9.60111e-06	0.000121804	5.37114	5.48315	6.37578	2.71711	2.6001	0.7539
zgc:171474	135.732	-1.34344	0.276314	-4.862	1.16206e-06	1.83728e-05	3.00587	2.87578	3.7432	6.81661	8.6309	9.88446
zgc:171673	80.8882	-1.28134	0.243774	-5.25626	1.47018e-07	2.84164e-06	1.6754	1.91718	1.31629	3.43214	4.91131	4.0208
zgc:171781	47.1958	1.73622	0.500445	3.46934	0.000521733	0.00390691	3.79429	1.57209	1.6865	0.905703	0.866701	0.418833
zgc:171977	149.435	1.27077	0.229554	5.53582	3.09774e-08	6.83772e-07	7.39148	11.6948	10.9005	4.38551	4.69463	3.81138
zgc:172253	39.1035	2.3061	0.408521	5.64501	1.65176e-08	3.85722e-07	1.62613	2.1089	3.33186	0.33368	0.43335	0.712016
zgc:173486	34.3465	-1.2872	0.436008	-2.95224	0.0031548	0.0174745	1.08408	1.34203	0.987218	2.04975	3.39458	3.22502
zgc:173570	33.7569	-1.1941	0.428374	-2.78752	0.00531129	0.0266306	1.52757	1.11197	0.987218	3.76582	3.28624	1.5078
zgc:173593	308.751	-8.60877	0.891577	-9.65566	4.65161e-22	5.72419e-20	0.0492765	0.0766873	0	26.8374	10.3282	13.9053
zgc:173742	125.131	-1.10789	0.330381	-3.35338	0.000798322	0.00559242	2.80876	3.14418	5.01836	5.72023	9.06425	9.75881
zgc:173962	13.1396	-5.99367	1.12593	-5.32329	1.01908e-07	2.05585e-06	0.0492765	0	0.0411341	2.5741	1.33616	1.71722
zgc:174153	2539.92	5.59578	0.428228	13.0673	5.06204e-39	2.13575e-36	19.415	17.5231	20.567	0.33368	0.43335	0.460717
zgc:174275	204.562	-1.07733	0.286726	-3.75733	0.000171735	0.00152039	7.88424	5.71321	4.77155	13.1089	14.445	12.6488
zgc:174696	89.9912	2.39534	0.337814	7.09072	1.33415e-12	6.39656e-11	2.11889	2.26228	2.59145	0.524354	0.216675	0.670133
zgc:174855	1616.85	5.68693	0.500623	11.3597	6.63606e-30	1.53117e-27	10.7916	10.1227	15.0551	0.476686	0.108338	0.167533
zgc:174862	243.447	8.01178	0.854259	9.37863	6.68356e-21	7.59201e-19	8.42629	9.62426	12.7927	0.0476686	0.0361125	0.0418833
zgc:194207	17.7275	-2.11467	0.676586	-3.1255	0.00177505	0.0108363	0.14783	0.0766873	0.822681	2.28809	1.33616	1.04708
zgc:194221	103.881	3.99738	0.359356	11.1237	9.61476e-29	2.08796e-26	6.75088	7.36199	7.98001	0.33368	0.541688	0.544483
zgc:194839	1074.87	1.02967	0.145244	7.08924	1.34853e-12	6.4446e-11	48.2417	55.6367	51.4587	21.5939	33.2597	24.1248
zgc:195245	96.1902	1.85799	0.434318	4.27794	1.88628e-05	0.000222113	1.97106	1.34203	2.87939	0.619692	0.325013	0.837666
zgc:198419	645.29	-4.94478	0.327179	-15.1134	1.32232e-51	1.08481e-48	0.837701	0.460124	0.493609	24.4063	12.206	19.3082
zgc:55413	739.093	1.02504	0.212295	4.82837	1.37652e-06	2.14647e-05	28.5311	19.2102	35.1285	13.6332	13.7589	14.7429
zgc:63568	41.2149	1.00706	0.365268	2.75706	0.00583243	0.0288148	1.4783	1.68712	2.18011	0.66736	1.19171	0.87955
zgc:65997	35.8356	-1.12357	0.435929	-2.57741	0.00995426	0.0440895	0.837701	0.805217	1.35742	2.38343	2.99734	1.38215
zgc:77816	311.55	1.20044	0.273447	4.39003	1.13336e-05	0.000141354	15.9163	19.632	18.5926	8.86636	7.61975	7.91595
zgc:85777	103.18	1.14735	0.269327	4.26006	2.04376e-05	0.000238407	3.54791	6.21168	6.58145	2.47877	2.38343	2.80618
zgc:86896	76.0015	-1.36137	0.487088	-2.79491	0.00519135	0.0261195	1.62613	0.881904	1.02835	5.19588	1.91396	2.21982
zgc:92066	35035.8	1.06617	0.265111	4.0216	5.78033e-05	0.000587645	1085.12	761.582	1041.76	670.649	378.315	371.756
zgc:92326	222.423	2.63384	0.433491	6.07588	1.2331e-09	3.62734e-08	11.9249	18.1749	6.74599	2.14509	2.3112	1.71722
zic1	476.96	-1.10001	0.307651	-3.57552	0.000349529	0.00278247	28.9253	42.3314	39.4887	74.22	87.5368	84.3949
zmp:0000001101	36.814	-2.19562	0.424731	-5.16944	2.34797e-07	4.37735e-06	1.23191	1.57209	1.6865	4.95753	7.36696	9.08868
znf1000	32.801	2.26296	0.564899	4.00596	6.17664e-05	0.000624301	1.28119	2.26228	1.89217	0.476686	0.2889	0.418833
znf1004	144.258	4.63884	0.686115	6.76102	1.3702e-11	5.63616e-10	3.00587	8.93408	2.67371	0.143006	0.252788	0.209417
znf1016	21.5061	1.90091	0.491338	3.86884	0.000109354	0.00102204	1.13336	1.38037	1.97444	0.524354	0.43335	0.293183
znf1022	22.1713	1.51421	0.450648	3.36008	0.000779209	0.00547411	1.23191	1.57209	1.76877	0.238343	0.613913	0.795783
znf1025	11.5431	-6.38303	1.10116	-5.79662	6.76654e-09	1.71392e-07	0	0.0383437	0.0411341	1.85907	3.10568	2.34547
znf1027	51.0398	-2.36295	0.415293	-5.68984	1.27161e-08	3.06327e-07	0.985531	0.996935	1.6865	6.62593	8.23366	4.69093
znf1029	41.4546	-1.88303	0.45407	-4.147	3.36862e-05	0.000367389	0.542042	0.843561	1.76877	3.38447	2.41954	6.2825
znf1040	88.1554	1.12366	0.209143	5.37271	7.75627e-08	1.60866e-06	3.59719	4.40952	4.97722	2.00208	2.52788	1.63345
znf1048	67.365	5.50913	0.744192	7.40283	1.33309e-13	7.10677e-12	2.71021	4.17946	4.03114	0.0476686	0.0361125	0.167533
znf1054	52.6394	6.94337	1.10174	6.30217	2.93515e-10	1.00705e-08	2.41455	3.29756	3.99001	0	0.0722251	0
znf1057	162.463	1.86255	0.243891	7.6368	2.22688e-14	1.32598e-12	6.11029	11.0813	8.06228	2.33576	2.81678	2.05228
znf1060	107.846	-1.75112	0.401631	-4.36002	1.30048e-05	0.000159107	1.13336	2.14725	1.48083	4.57618	6.53637	5.61236
znf1064	55.4299	2.10512	0.447218	4.70715	2.51209e-06	3.6262e-05	1.18264	2.64571	3.04392	0.524354	0.469463	0.670133
znf1068	114.337	1.53085	0.3201	4.78241	1.73208e-06	2.62604e-05	3.3508	3.71934	4.48361	1.6684	1.51673	0.963316
znf1077	46.4862	-2.25309	0.366154	-6.15339	7.58449e-10	2.3579e-08	1.03481	0.958592	0.575877	4.05183	4.55018	4.06268
znf1080	10.8457	-1.99487	0.562657	-3.54545	0.000391943	0.00307274	0.14783	0.498468	0.246804	1.14405	1.08338	1.54968
znf1081	53.1997	-2.6552	0.344358	-7.71056	1.25262e-14	7.61213e-13	0.640595	0.996935	0.411341	4.81453	5.48911	3.18313
znf1089	53.4985	2.69999	0.507404	5.32118	1.03094e-07	2.0741e-06	2.21744	3.10584	3.90774	0.429017	0.216675	0.837666
znf1097	29.9367	2.45932	0.766448	3.20873	0.00133325	0.00856748	1.18264	1.57209	1.76877	0.190674	0	0.670133
znf1098	26.2353	2.01382	0.622086	3.2372	0.00120707	0.00787666	1.4783	1.4954	1.72763	0.429017	0.361125	0.418833
znf1101	15.9042	-1.97725	0.570654	-3.46489	0.000530456	0.00396218	0.344936	0.345093	0.246804	1.14405	1.33616	1.34027
znf1105	53.9075	1.6723	0.461604	3.62279	0.000291437	0.00239225	1.57685	2.53068	3.12619	0.66736	1.04726	0.62825
znf1106	41.8403	2.52169	0.550614	4.57978	4.65469e-06	6.36443e-05	1.77395	1.95553	3.04392	0.33368	0.14445	0.7539
znf1110	92.495	2.74147	0.424821	6.45324	1.09482e-10	3.9919e-09	3.69574	5.09971	7.2396	0.905703	0.541688	1.04708
znf1112	92.4511	-1.21029	0.285046	-4.24597	2.17654e-05	0.000250905	2.95659	2.83743	3.7432	5.95857	8.0531	8.87926
znf1113	37.1458	-1.16438	0.368089	-3.1633	0.0015599	0.00974409	0.689871	1.15031	1.48083	2.33576	3.32235	2.09417
znf1117	41.0578	-4.97833	0.709155	-7.02008	2.21741e-12	1.01691e-10	0.0492765	0.0383437	0.164536	2.86011	2.96123	2.47112
znf1118	55.7297	-1.58474	0.336298	-4.71231	2.44922e-06	3.54585e-05	0.739148	0.881904	1.43969	2.62177	3.28624	3.64385
znf1120	52.8789	2.50575	0.43312	5.78536	7.23557e-09	1.81714e-07	1.77395	2.56903	2.42691	0.429017	0.43335	0.37695
znf1129	53.2937	-1.18006	0.367558	-3.21053	0.00132491	0.00852506	1.33047	1.95553	2.13897	3.81349	2.56399	6.40815
znf1130	50.6393	-1.40448	0.451684	-3.10943	0.00187448	0.0113631	0.837701	0.996935	0.617011	1.00104	1.66118	4.10457
znf1133	38.8542	2.54062	0.474829	5.35059	8.76663e-08	1.80051e-06	1.87251	3.06749	1.48083	0.476686	0.541688	0.12565
znf1141	70.4314	-2.35343	0.337864	-6.96562	3.26963e-12	1.44993e-10	0.689871	0.920248	0.946084	4.71919	5.74189	3.14125
znf1147	74.1671	4.63421	0.581442	7.9702	1.58414e-15	1.06817e-13	2.75949	3.9494	5.18289	0.0953372	0.108338	0.293183
znf1149	47.7941	2.2158	0.403249	5.49486	3.91021e-08	8.54173e-07	1.57685	2.454	3.33186	0.572023	0.650026	0.418833
ZNF385D	10.8761	-3.78053	0.711694	-5.31201	1.08421e-07	2.16945e-06	0.246383	0.153375	0.0411341	1.47773	2.63622	2.05228
znf503	1772.32	1.51934	0.313093	4.85269	1.21801e-06	1.91956e-05	77.6598	114.379	95.7601	26.8374	42.1794	35.3495
ZNF512B	40.6348	3.95485	0.642188	6.1584	7.34854e-10	2.30395e-08	3.44936	2.83743	1.56309	0.143006	0.2889	0.0837666
ZNF628_(3_of_6)	85.8917	-1.13828	0.364562	-3.12233	0.00179424	0.0109374	0.689871	1.03528	0.699279	1.81141	1.87785	1.88475
ZNF628_(6_of_6)	63.8873	-1.10068	0.30306	-3.63189	0.00028135	0.00232236	1.08408	1.91718	1.15175	3.52747	3.35847	2.42923
ZNF689	83.7625	1.61981	0.27305	5.93229	2.98736e-09	8.10926e-08	5.02621	3.91105	3.20846	1.04871	1.55284	1.46592
znf703	2444.23	2.05751	0.330988	6.21628	5.09073e-10	1.64496e-08	59.871	89.6475	73.7945	12.9659	25.8205	17.0465
znf974	40.5154	-1.95515	0.338497	-5.77596	7.65135e-09	1.9118e-07	0.886977	1.11197	1.60423	4.90986	5.38077	4.23022
znf977	85.6881	1.51382	0.287064	5.27347	1.33867e-07	2.61483e-06	3.3508	3.9494	4.97722	1.04871	1.55284	1.84287
znf980	71.1719	-1.0814	0.391847	-2.75976	0.00578441	0.0286351	2.26672	1.07362	2.67371	3.52747	4.55018	5.06788
znf981	52.283	1.59761	0.345527	4.6237	3.7695e-06	5.30135e-05	2.06961	2.37731	2.34464	0.715029	1.01115	0.586366
znf987	19.1036	-1.61782	0.428455	-3.77593	0.000159409	0.0014258	0.886977	0.536811	0.658145	1.81141	3.03345	1.71722
znf995	53.3424	4.37267	0.524549	8.33606	7.68047e-17	6.03285e-15	2.21744	2.91412	3.04392	0.143006	0.252788	0
zp2.3	147.38	1.55408	0.342429	4.53841	5.66791e-06	7.5951e-05	8.86977	4.90799	15.8778	4.81453	3.03345	2.55488
zp2.5	43.9072	1.01257	0.338164	2.9943	0.00275077	0.0155635	2.16817	1.26534	2.18011	1.19171	0.975039	0.712016
zpcx	123.195	-1.42408	0.430245	-3.30992	0.000933224	0.00634189	1.33047	2.68406	8.06228	12.6798	11.1227	9.50751
