# Supplementary material for: Nodal and planar cell polarity signaling cooperate to regulate zebrafish convergence and extension gastrulation movements
Source: eLife. 2020 Apr 22;9:e54445. doi: 10.7554/eLife.54445 (PMC7250581; doi:10.7554/eLife.54445)
Supplement: Source data 2. [file elife-54445-data2.xlsx]

## Sheet: CPM
	wt_90_1	wt_90_2	wt_90_3	mzoep_90_1	mzoep_90_2	mzoep_90_3
545013	0	0	0	0	0	0
5_8S_rRNA	0.689871	0.268406	0.822681	0.953372	0.794476	1.42403
5S_rRNA	16.8033	16.1043	17.2352	15.3493	18.7063	18.9313
7SK	0	0	0	0	0	0.0418833
a1cf	207.454	194.134	269.881	159.118	146.364	147.346
a2ml	65.7842	66.833	70.8329	138.716	122.422	114.006
aaas	12.5655	9.89267	9.62537	12.6322	13.0005	10.8478
aacs	19.6613	21.2807	19.333	15.2539	28.89	20.4391
aadac	0.14783	0	0.740413	0.190674	0.325013	0.0837666
aadacl4	1.62613	2.37731	1.76877	0	0	0.0837666
AADAT	1.97106	1.76381	2.0567	2.04975	2.05841	1.42403
aaed1	0.246383	0.460124	0.370207	0.476686	0.43335	0.712016
aagab	6.75088	7.32364	9.09063	9.20004	6.75305	6.15685
aak1a	9.85531	16.5261	10.2835	7.81765	9.06425	9.08868
aak1b	15.6207	14.8773	12.5459	10.8208	13.9756	13.0257
aamdc	1.13336	0.920248	0.946084	0.810366	1.30005	0.37695
aamp	71.0075	81.9021	84.8596	93.7164	97.865	102.656
aanat1	0.295659	0	0.164536	0.0953372	0.14445	0.293183
aanat2	0.689871	0.881904	1.06949	0.524354	0.577801	0.544483
aar2	16.6555	15.8743	17.3586	15.683	12.206	12.188
aars2	14.2902	14.8773	16.5359	21.7845	28.3122	27.266
aars	217.112	288.536	241.334	212.459	268.93	245.227
aarsd1	3.00587	2.37731	3.29073	3.47981	3.57514	4.7747
aasdh	2.46383	1.80215	1.8099	1.71607	2.70844	3.47632
aasdhppt	4.48416	3.41259	4.11341	4.00416	3.1779	2.72242
aass	10.8408	10.0844	7.98001	6.95961	11.3032	9.92635
aatf	73.0771	89.6475	82.2681	94.0978	83.745	98.342
aatka	0	0.230062	0.246804	0.190674	0.180563	0.12565
aatkb	2.56238	1.26534	0.90495	3.09846	3.25013	4.5234
abat	38.485	36.3115	31.4264	24.0726	25.9288	18.2611
abca12	15.7192	18.3666	11.5998	18.7814	28.0594	24.2923
abca1a	59.526	31.8636	36.5271	158.975	115.416	140.016
abca1b	579.246	668.637	565.018	651.153	599.757	579.665
abca2	4.38561	4.60124	3.24959	4.29017	4.94742	6.57568
abca3b	29.3195	47.8529	34.1824	59.109	89.5591	79.4945
abca4a	5.02621	5.86658	6.12898	74.1246	100.357	98.007
abca4b	0.0985531	0.0383437	0.329073	0.143006	0.180563	0.460717
abca5	45.5808	30.4065	32.6193	38.8976	56.6606	54.574
ABCA7	3.84357	3.41259	3.70207	2.5741	3.86404	2.88995
abcb10	54.0071	53.8729	42.2447	35.7038	42.2878	34.093
abcb11a	10.2002	17.4464	16.577	64.1619	34.668	35.4333
abcb11b	0	0.115031	0	0.0953372	0.361125	0.0837666
abcb3l1	0	0	0.0411341	0.0476686	0.0722251	0
abcb4	0.542042	0.0383437	0.370207	0	0.216675	0.12565
abcb5	218.492	317.677	233.477	184.906	292.078	225.458
abcb6a	304.233	289.15	251.699	45.4758	62.1858	62.4061
abcb6b	8.52484	7.05524	9.1729	6.19692	5.85023	6.70133
abcb7	31.2413	30.6366	29.8222	33.4157	32.3207	32.9622
abcb8	8.47556	7.86045	9.00836	4.38551	6.21136	6.74321
abcb9	0.344936	0.230062	0.329073	0.190674	0.180563	0.418833
abcc10	19.7106	21.9709	21.5131	17.3037	27.2289	19.1407
abcc12	0.344936	0.0766873	0.287939	0.381349	0.216675	0.167533
abcc13	3.30153	2.79909	3.00279	0.476686	0.577801	0.37695
abcc1	16.7047	18.4817	20.8138	19.5441	25.5316	25.5907
abcc2	31.8326	40.3375	36.6093	47.3826	37.6654	31.9151
ABCC3	49.2273	89.7625	54.7083	51.4344	84.2144	68.0604
abcc4	21.1889	23.428	21.5954	27.3141	21.3786	31.3287
abcc5	16.9511	14.1488	12.258	6.33992	8.37811	6.5338
ABCC6	11.3336	16.2961	15.8366	7.4363	13.7228	11.0991
abcc6a	3.89285	4.71627	5.34743	0.905703	1.48061	1.0052
ABCC8_(2_of_2)	0.0492765	0	0	0.286011	0	0.167533
abcc8	0.837701	1.61043	0.90495	0.381349	0.577801	0.87955
abcc9	1.28119	1.15031	1.64536	0.953372	0.505576	1.0052
abcd1	2.26672	1.57209	1.31629	1.38239	1.69729	2.09417
ABCD2	0	0	0	0	0	0
abcd3a	7.39148	8.1672	9.5431	13.6809	13.6144	14.4497
abcd3b	10.6437	11.7715	9.37857	12.6322	11.4116	13.3189
abcd4	5.6668	7.05524	6.70485	4.0995	3.39458	4.31398
abce1	484.585	583.782	494.061	482.025	506.659	509.678
abcf1	186.61	210.2	197.731	194.583	234.118	205.354
ABCF2_(2_of_2)	0.739148	1.11197	2.75598	0.476686	1.04726	0.795783
abcf2a	468.965	492.946	462.964	539.847	529.302	555.205
ABCF3	23.9977	25.1534	18.1813	16.5887	20.2952	23.706
abcg1	0.936254	0.72853	0.822681	1.04871	1.40839	0.837666
abcg2a	2.66093	2.454	2.38578	2.24042	2.67233	1.88475
abcg2b	0.14783	0.0383437	0.0411341	0.190674	0.0722251	0.0837666
abcg2c	15.7685	12.9602	13.8622	4.90986	6.28358	5.48671
abcg2d	0.936254	0.843561	0.699279	0.238343	0.469463	0.37695
abcg4a	0.0985531	0	0.0411341	0	0.0722251	0
abcg4b	0.344936	0.0383437	0.287939	0.286011	0.108338	0.167533
abcg5	0.0985531	0.153375	0.0411341	0	0	0
abcg8	0.443489	0.345093	0.493609	0.0476686	0.0361125	0
abch1	0.443489	0.115031	0.287939	0.524354	0.252788	0.37695
abhd10a	1.37974	1.53375	1.52196	1.76374	2.0223	2.30358
abhd10b	15.6699	8.74236	14.6437	10.5824	6.39192	8.08348
abhd11	1.6754	1.4954	1.76877	1.43006	1.84174	1.71722
abhd12	58.6391	63.8422	59.7267	65.592	78.4003	70.0708
ABHD12B_(1_of_2)	0.0492765	0.268406	0.164536	0.0953372	0.252788	0.167533
ABHD12B_(2_of_2)	0.0985531	0.0383437	0.493609	0.0953372	0	0.12565
abhd13	6.3074	8.28223	6.82826	7.5793	9.42537	9.0468
abhd14a	8.52484	9.12579	7.98001	14.6343	21.0175	17.7166
abhd14b	10.2002	10.3144	9.5431	6.33992	6.8975	6.86886
abhd15a	2.71021	2.07056	2.46804	1.90674	2.889	2.63865
abhd15b	1.03481	0.536811	0.658145	0.858034	1.26394	1.08897
abhd16a	22.815	18.8651	20.6904	23.5959	24.4843	22.9521
abhd17aa	39.027	30.1381	33.8945	37.8012	36.1848	38.5327
abhd17ab	18.3309	24.6933	22.3769	21.9752	23.5815	24.7112
abhd17b	6.40595	6.28836	6.00557	6.14925	7.07806	6.86886
abhd17c	72.535	78.7579	73.3421	84.8024	94.326	85.1488
ABHD18	4.48416	4.48621	4.23681	5.86324	6.10302	6.86886
abhd2a	7.1451	5.98161	8.43248	5.72023	6.93361	6.24061
abhd2b	0.640595	0.996935	0.411341	1.52539	2.05841	1.5078
abhd3	0.197106	0.536811	0.246804	0.0953372	0.361125	0.335067
abhd4	0.394212	0.613499	0.329073	0.715029	0.325013	1.0052
abhd5a	0.591318	0.651842	1.02835	1.38239	1.01115	1.0052
abhd5b	0.14783	0.0383437	0.0822681	0.0476686	0.0361125	0.0837666
abhd6a	0.0985531	0	0.0411341	0.0476686	0	0.0837666
abhd6b	0.591318	0.230062	0.411341	0.953372	0.469463	0.62825
abhd8a	0	0.651842	0.534743	0	0.0361125	0.0837666
abhd8b	2.66093	3.14418	3.7432	3.38447	4.98353	5.06788
abi1a	16.0641	18.6734	16.9061	16.7793	20.4397	18.7218
abi1b	6.15957	5.29143	5.14176	4.00416	5.48911	4.0208
abi2a	30.108	36.5415	29.1229	33.7494	33.8013	35.2658
abi2b	40.8995	38.4587	44.795	53.0075	58.2495	55.3697
abi3a	0.14783	0	0	0.0953372	0.0722251	0.0418833
abi3b	0	0.191718	0	0.0476686	0.14445	0.293183
abi3bpa	0.0492765	0	0.0411341	0.143006	0.0722251	0.12565
abi3bpb	0	0	0	0	0	0
abl1	40.2096	50.3452	43.9723	35.9898	52.1826	46.0298
abl2	61.5957	67.7149	59.2742	68.6904	91.6536	84.4787
ablim1a	0.14783	0.0766873	0.0411341	0.0476686	0	0.167533
ablim1b	4.04068	2.7224	3.7432	7.91298	5.09187	3.0156
ablim2	0.14783	0.0383437	0.20567	0.0476686	0.0722251	0.293183
ablim3	0.886977	0.881904	0.863816	0.810366	0.361125	0.586366
abo	0.0492765	0.0383437	0.0822681	1.38239	1.91396	2.42923
ABR	1.23191	1.91718	1.06949	1.00104	1.37228	2.0104
abraa	0	0.0383437	0.0411341	0.0476686	0	0.0837666
abrab	0	0	0	0	0.108338	0.0418833
abracl	146.499	113.651	181.237	100.39	54.8911	73.1702
abt1	44.2996	49.6167	45.6177	44.1888	44.8157	47.6213
abtb1	8.03207	10.0844	8.51475	9.67672	14.5534	14.5335
ABTB2_(1_of_2)	127.331	127.454	124.472	87.7579	108.374	92.1852
abtb2b	74.6047	85.6214	76.5505	46.2385	49.0769	48.5009
AC024175.10	0	0	0	0	0	0
AC024175.11	0	0	0	0	0	0
AC024175.12	0	0	0	0	0	0
AC024175.13	0	0	0	0	0	0
AC024175.14	0	0	0	0	0	0
AC024175.15	0	0	0	0	0	0
AC024175.16	0	0	0	0	0	0
AC024175.1	0	0	0	0	0	0
AC024175.17	0	0	0	0	0	0
AC024175.18	0	0	0	0	0	0
AC024175.19	0	0	0	0	0	0
AC024175.20	0	0	0	0	0	0
AC024175.21	0	0	0	0	0	0
AC024175.22	0	0	0	0	0	0
AC024175.23	0	0	0	0	0	0
AC024175.24	0	0	0	0	0	0
AC024175.2	0	0	0	0	0	0
AC024175.3	0	0	0	0	0	0
AC024175.4	0	0	0	0	0	0
AC024175.5	0	0	0	0	0	0
AC024175.6	0	0	0	0	0	0
AC024175.7	0	0	0	0	0	0
AC024175.8	0	0	0	0	0	0
AC024175.9	0	0	0	0	0	0
ACA64	0.936254	0.996935	1.11062	1.28705	1.66118	1.04708
acaa1	4.87838	2.14725	6.58145	2.38343	3.57514	1.80098
acaa2	42.2793	42.9833	44.7539	39.1836	31.129	29.6953
ACAA2_(2_of_2)	0	0	0	0	0	0
acaca	71.8945	77.9527	63.8401	56.7733	89.0896	69.0656
acacb	133.342	160.392	146.19	116.502	133.255	133.231
acad11	2.85804	3.68099	4.56588	3.24146	5.34466	4.43963
acad8	5.51897	3.98774	3.6198	4.81453	5.05576	4.35587
acad9	7.53931	6.74849	9.13176	9.15237	13.0366	13.5283
acadl	1.37974	1.53375	2.55031	1.00104	1.1556	1.88475
acadm	36.5139	25.4985	22.9528	16.541	13.2172	13.9053
acads	15.7192	13.7654	15.0962	23.0716	16.4312	22.1144
acadsb	31.4384	39.494	33.5654	39.2312	50.1964	46.3648
ACADSB_(2_of_2)	0	0	0	0	0	0
acadvl	66.5233	58.8575	63.4287	55.1525	60.7413	63.7464
acana	0.591318	0.498468	0.822681	0.33368	0.252788	0.2513
acanb	0.0492765	0.191718	0.411341	0.0953372	0.325013	0.0837666
acap1	18.7251	21.1274	17.6054	12.3938	18.8869	14.2822
ACAP2_(1_of_2)	1.33047	0.575155	0.90495	1.09638	1.51673	1.54968
acap2	35.0356	34.5093	40.6816	28.9348	31.0207	30.4911
acap3a	33.3109	38.8038	38.8306	39.4696	36.907	45.234
acap3b	3.25225	3.18252	4.40135	4.05183	5.81412	5.026
acat1	4.77982	3.06749	4.44248	4.67152	5.70578	4.90035
acat2	10.0031	10.1611	6.82826	10.2487	9.89484	9.84258
ACBD3_(1_of_2)	47.9953	52.3775	41.9568	42.568	51.7854	47.035
acbd3	108.803	122.163	104.439	106.492	140.803	140.477
acbd4	1.4783	1.34203	1.89217	2.09742	1.98619	2.2617
acbd5a	10.3973	13.4586	10.5715	15.3493	19.4647	18.5962
acbd5b	0	0.115031	0	0	0.108338	0.12565
acbd6	13.7974	16.3727	14.5615	20.9265	26.5427	27.2242
acbd7	1.08408	0.536811	0.90495	1.04871	0.505576	0.418833
accs	30.5022	31.4035	41.6277	37.5152	42.8656	29.6953
acd	9.70748	10.5062	12.1346	9.72439	13.47	11.8949
ace2	0.394212	0.42178	0.287939	0.33368	0.2889	0.335067
ace	0.443489	0.460124	0.123402	0.953372	2.09453	1.17273
ACEA_U3	0	0	0	0	0	0
acer1	208.193	162.347	143.517	117.455	96.8177	88.6251
ACER2	0.985531	0.613499	0.946084	0.429017	0.830588	0.670133
acer3	6.11029	6.59511	5.34743	9.67672	9.89484	9.8007
ache	1.4783	1.15031	2.50918	2.4311	3.14179	3.0156
acin1a	202.625	228.145	217.311	253.168	304.97	280.283
acin1b	421.462	502.877	405.253	382.731	541.616	510.851
ACKR3_(2_of_2)	0.0492765	0	0	0.0953372	0	0
ackr3b	118.658	135.315	134.92	124.892	137.625	160.036
ackr4a	0.197106	0.345093	0.617011	0.190674	0.830588	1.13085
ackr4b	0	0	0.123402	0.190674	0.613913	0.37695
aclya	96.6805	92.8684	92.2637	115.358	145.064	132.058
aclyb	0.14783	0.191718	0.370207	0.33368	0.2889	0.12565
acmsd	0	0	0.0411341	0	0.0361125	0
aco1	25.3774	28.8344	25.6677	15.1109	24.5926	19.5595
aco2	117.426	143.865	121.633	164.457	197.138	199.532
acot11a	1.72468	0.996935	1.85103	3.00312	2.34732	1.88475
acot11b	0.295659	0.115031	0.534743	1.09638	0.902814	0.712016
ACOT12	1.42902	1.61043	1.60423	1.04871	1.40839	1.84287
acot13	2.61166	1.95553	2.67371	3.09846	1.62506	2.38735
acot7	5.32186	4.25615	4.07227	5.67256	5.63356	4.60717
acot8	0.246383	0.230062	0.493609	0.286011	0.180563	0.418833
acot9.1	5.32186	4.8313	6.45805	7.10262	7.54752	7.32958
acot9.2	0.788424	0.613499	1.15175	2.95545	1.95008	2.34547
acox1	5.32186	5.94327	7.28073	5.81557	7.04195	6.70133
acox3	2.46383	1.26534	1.06949	1.00104	1.26394	1.08897
acoxl	1.28119	0.345093	0.987218	0.238343	0.505576	0.586366
acp1	16.212	18.2516	23.8166	22.9763	17.5868	20.9835
acp2	6.20884	5.32977	8.88496	5.67256	6.31969	5.90555
acp5a	237.907	145.131	153.471	171.464	102.993	123.095
acp5b	0.739148	0.306749	1.02835	0.143006	0.0722251	0
acp6	1.57685	0.958592	1.64536	2.09742	2.09453	2.09417
acrc	48.5374	45.3989	42.656	44.2841	43.7323	45.9041
acsbg1	1.77395	3.3359	7.44527	0.953372	0.722251	0.837666
acsbg2	83.4252	80.1383	72.8896	65.5443	90.7508	67.474
acsf2	10.693	4.8313	7.11619	4.43318	7.22251	5.65425
ACSF3	2.11889	2.37731	3.08506	4.81453	2.85289	3.60197
acsl1a	15.1772	14.3405	14.109	7.81765	6.86138	7.70653
acsl1b	157.537	185.008	166.223	192.533	153.912	160.79
acsl3a	18.8236	22.7761	18.3047	14.3959	18.2368	16.167
acsl3b	80.37	83.8576	84.9007	85.7081	106.099	106.342
acsl4a	180.5	211.274	209.743	281.817	268.352	248.159
acsl4b	10.2002	7.5537	6.91052	5.7679	7.40307	5.82178
acsl5	68.8886	83.896	62.4827	91.3807	62.4747	64.961
ACSL6	0.0492765	0	0	0.238343	0.216675	0.2513
acsm3	4.63199	4.79296	10.4892	14.0622	14.0117	17.2559
acss1	118.707	119.326	142.077	85.1361	68.1805	69.0237
acss2	55.5839	61.6183	70.2159	58.2033	73.7779	64.4584
acss2l	25.0325	20.4372	24.557	26.0747	36.4014	22.5332
acss3	10.9394	16.3344	14.5203	15.0633	19.248	21.4024
acta1a	1.77395	1.57209	1.27516	0.66736	0.397238	0.293183
acta1b	0.246383	0.460124	0.329073	0.810366	1.08338	0.837666
acta2	1.42902	2.18559	0.370207	5.95857	6.86138	8.58608
ACTA2_(2_of_2)	0.0492765	0.115031	0.0822681	0.0476686	0.180563	0.12565
actb1	4876.45	3235.06	2758.78	2754.15	2520.66	2462.11
actb2	3231.7	3244.37	2626.16	2735.41	2775.97	2660.85
ACTC1_(4_of_6)	0.0985531	0.536811	0.699279	0.619692	0.686138	0.87955
ACTC1_(5_of_6)	20.6961	15.3375	29.9456	0.143006	0.108338	0.335067
actc1a	5.37114	8.32058	2.09784	0.0953372	0.0361125	0.0837666
actc1b	0.788424	0.843561	0.246804	0.286011	0.541688	0.460717
actl6a	292.013	302.992	311.138	302.838	283.447	310.23
actl6b	0	0.0383437	0	0.0476686	0	0.0837666
actn1	4.58272	4.52455	5.4297	4.38551	6.35581	5.57048
actn2b	0.394212	1.03528	0.658145	1.19171	1.1556	2.59677
actn3a	1.87251	2.49234	2.18011	1.76374	2.70844	2.55488
actn3b	12.1713	19.6703	9.0495	26.6467	45.3574	26.3027
ACTN4	0	0	0	0	0	0
actr10	42.4271	49.1566	48.4559	42.9494	50.0159	47.2444
actr1	73.0771	90.7211	76.0158	80.7029	94.0009	90.091
actr2a	222.927	242.83	234.711	242.633	309.159	295.194
actr2b	19.7106	13.727	11.5175	15.683	23.3287	20.4391
actr3	276.343	317.716	329.031	233.624	284.856	233.793
actr3b	0.0492765	0	0.0822681	0.0476686	0.0361125	0.167533
actr5	42.6735	45.8974	46.0702	49.623	61.3913	51.6002
actr6	41.6387	51.8023	49.8956	55.4862	43.8406	44.0613
actr8	44.2996	42.2931	46.6049	44.5225	41.5294	40.208
acvr1ba	162.12	153.26	157.955	113.88	108.699	111.954
acvr1bb	39.5198	34.701	32.4959	29.1255	30.5151	32.5852
ACVR1C	0.197106	0.498468	0.370207	0.33368	0.252788	0.12565
acvr1l	325.225	387.616	362.556	436.454	557.361	549.844
acvr2aa	87.2687	104.64	88.4383	73.6956	90.823	79.7458
acvr2ab	16.6555	15.2608	14.6437	12.7275	15.4201	13.0676
acvr2b	64.5523	66.9864	80.6228	81.2749	105.376	95.494
ACVR2B_(2_of_2)	185.871	194.671	185.885	160.643	190.71	196.098
acvrl1	8.37701	5.55983	6.12898	8.96169	6.28358	6.65945
acy1	3.10442	2.7224	4.36021	5.81557	4.44184	5.36106
acy3.1	3.20297	3.71934	3.16732	3.19379	2.38343	2.2617
acy3.2	38.6328	37.0016	34.5938	55.3909	39.8321	45.4853
acyp1	0.0492765	0.651842	0.863816	1.47773	0.794476	1.04708
ACYP2	0	0	0.0411341	0	0	0
ada	0.985531	0.881904	1.11062	1.00104	1.4445	1.5078
adad1	1.77395	0.996935	1.27516	1.95441	1.40839	1.7591
adal	1.4783	0.766873	1.60423	0.572023	0.43335	0.795783
adam10a	127.183	138.306	138.252	120.315	167.382	137.377
adam10b	27.447	38.5737	25.5443	27.8385	46.9102	28.8995
adam11	1.37974	0.72853	1.23402	1.6684	1.11949	1.29838
adam12	2.06961	1.11197	1.72763	2.62177	2.49177	1.96852
adam15	3.94212	2.76074	2.18011	4.95753	4.91131	4.2721
adam17a	59.526	51.1888	47.551	39.0406	52.2187	47.0769
adam17b	7.19437	7.70708	7.4864	8.72335	10.3643	8.62796
adam19a	8.22918	10.8896	9.95445	5.0052	3.25013	2.7643
adam19b	1.13336	0.153375	1.06949	1.28705	1.11949	1.04708
adam22	1.4783	1.03528	1.19289	0.905703	1.95008	0.921433
adam23a	0.197106	0.115031	0.123402	0	0.180563	0.12565
adam28	19.07	20.5139	16.248	18.4954	19.6091	18.9731
adam8a	15.6207	10.2378	11.5998	6.10158	7.58363	5.65425
adam8b	2.21744	1.64878	1.9333	2.14509	2.63622	2.63865
adam9	7.68714	8.1672	9.74878	4.62385	6.57248	6.32438
adamts10	0.492765	0.42178	0.617011	0.381349	0.469463	0.335067
adamts12	0.985531	0.536811	0.287939	0.33368	0.613913	0.795783
adamts13	0.0492765	0.0383437	0	0	0	0
adamts1	0.689871	1.18865	3.6198	0.524354	0.2889	0.5026
ADAMTS14	1.37974	0.72853	1.02835	0.0953372	0.505576	0.586366
adamts15a	0.14783	0.0383437	0.20567	0	0.0361125	0.0418833
adamts15b	2.66093	2.22393	1.6865	0.858034	1.37228	0.963316
ADAMTS16	0.689871	1.26534	0.781547	0.143006	0.325013	0.0418833
ADAMTS17	0.492765	0.536811	0.617011	0.572023	0.830588	1.04708
adamts18	117.771	123.505	117.685	35.5608	50.0159	46.7418
adamts2	1.23191	0.153375	0.452475	0.143006	0.397238	0.5026
adamts3	1.72468	1.53375	1.6865	10.9161	18.0563	14.2403
adamts5	0.246383	0	0.246804	0.143006	0.0722251	0.209417
adamts6	0.197106	0.42178	0.329073	0.0953372	0.216675	0.0418833
ADAMTS7	1.77395	1.64878	2.96165	1.57306	1.55284	1.84287
adamts8a	0.14783	0.0383437	0.452475	0.238343	0.397238	0.293183
adamts9	5.76535	3.02915	4.23681	3.90882	2.70844	3.2669
adamtsl2	0	0.306749	0.329073	0.524354	0.541688	0.167533
adamtsl3	1.42902	1.68712	1.43969	1.81141	3.43069	1.2565
ADAMTSL4	0.788424	0.843561	0.493609	0.476686	0.613913	0.586366
ADAMTSL5	0.197106	0.115031	0.370207	0.33368	0.0361125	0.5026
adamtsl7	0.14783	0.153375	0.287939	0.572023	0.469463	0.335067
adap2	3.05514	2.22393	2.09784	1.47773	1.33616	2.47112
adar	152.659	167.255	150.386	164.409	214.725	197.522
adarb1a	2.36527	2.37731	3.41413	1.6684	1.91396	1.63345
adarb1b	4.53344	3.75768	3.41413	5.14821	6.64471	5.65425
adarb2	6.45523	7.82211	7.03393	5.33888	3.7557	8.20913
adat1	3.40008	2.64571	2.92052	4.95753	4.15294	4.60717
adat2	23.7513	26.8406	32.208	26.3607	26.9761	27.266
adat3	3.84357	4.71627	5.01836	7.62697	5.01964	5.48671
adck1	2.26672	1.72547	1.60423	1.00104	0.866701	1.54968
adck2	24.4904	24.4249	25.2563	27.2664	30.9484	32.1245
ADCK3_(2_of_2)	9.95386	8.09051	8.06228	7.38863	5.88634	8.62796
adck3	35.1834	36.5415	35.6632	27.1711	26.6149	29.4021
adck4	12.3684	9.96935	9.1729	13.3472	13.7589	13.5702
adck5	9.0176	6.90186	7.98001	9.15237	9.96706	10.0101
adcy1a	0.295659	0.191718	0.452475	1.47773	1.11949	0.712016
adcy1b	0	0.115031	0.164536	0	0.0361125	0
adcy2a	16.0149	17.2547	25.6677	23.3099	16.359	23.4965
adcy2b	0.295659	0.306749	0.452475	1.62073	2.74455	2.55488
ADCY3	3.74502	3.02915	4.36021	3.14613	4.76686	4.56528
adcy3b	0.492765	1.41872	0.740413	0.0476686	0	0.2513
adcy5	3.49863	3.22087	2.87939	3.47981	5.56133	5.94743
adcy6a	3.79429	2.41565	4.15454	3.38447	3.25013	4.69093
adcy6b	29.7137	28.336	29.0407	36.9431	29.4678	29.7372
adcy7	2.21744	1.8405	2.75598	5.67256	7.00583	6.86886
adcy8	1.28119	13.6887	8.88496	6.81661	7.54752	7.2877
ADCY9_(2_of_2)	0.0985531	0	0.164536	0	0	0.0837666
adcy9	6.60305	5.4448	4.89495	6.62593	8.30588	8.5442
adcyap1a	0.344936	0.0383437	0.123402	0.33368	0.216675	0.586366
adcyap1b	0	0	0.0822681	0.0476686	0.0722251	0
adcyap1r1a	0.394212	0.42178	0.575877	0.286011	0.216675	0.293183
adcyap1r1b	0.443489	0.42178	0.575877	0.715029	0.541688	0.335067
add1	143.789	149.54	126.24	122.508	173.051	139.304
add2	0.14783	0	0.0411341	0.0953372	0	0.0418833
add3a	129.647	137.232	136.935	133.853	168.212	148.309
add3b	178.874	193.636	160.875	65.4966	142.464	146.424
adgb	2.02034	1.99387	2.22124	1.62073	2.34732	2.42923
adgra1a	0.344936	0.268406	0.370207	0.286011	0.2889	0.293183
adgra2	0.197106	0.191718	0.20567	0	0.108338	0.209417
ADGRA3	76.3293	79.8315	70.3393	114.357	130.438	122.886
adgrb1a	0.739148	0.306749	0.575877	0.953372	1.08338	1.29838
adgrb1b	0.689871	0.536811	0.370207	0.143006	0.397238	0.293183
adgrb2	0.295659	0.306749	0.370207	0.238343	0.252788	0.5026
adgrb3	1.6754	1.26534	2.09784	0.143006	0.397238	0.544483
adgrd1	0.0985531	0.115031	0.164536	0.0476686	0.0361125	0.0418833
adgrd2	0.886977	0.575155	0.658145	0.381349	0.722251	0.670133
adgre10	11.3829	11.1964	11.2707	8.58034	12.8922	9.63316
adgre14	0.197106	0.115031	0.164536	0.0953372	0.180563	0
adgre15	0	0	0.0822681	0	0	0
adgre16	0	0	0.0411341	0	0.0361125	0
adgre17	0	0	0	0	0	0.0418833
adgre18	0.14783	0	0.0411341	0	0	0
adgre19	0	0	0	0	0	0
ADGRE5_(2_of_3)	0.0985531	0.0383437	0.0411341	0.0953372	0.0361125	0.293183
adgre5a	0	0	0.0411341	0	0	0
adgre5b.2	0.197106	0.460124	0.740413	0.33368	0.505576	0.62825
adgre5b.3	6.25812	10.2761	9.37857	7.05495	7.54752	6.32438
adgre6	0	0	0	0	0	0
adgre7	0.0492765	0	0.0822681	0	0	0.0418833
adgre8	0.246383	0.268406	0.0822681	0.0476686	0.0722251	0
adgre9	1.92178	0.498468	0.617011	0.572023	0.325013	0.544483
adgrf11	0	0	0	0	0.0361125	0
adgrf3a	0.0492765	0.0766873	0	0	0	0
adgrf3b	1.08408	3.22087	1.23402	2.00208	1.98619	2.0104
adgrf6	0.246383	0.383437	0.0822681	0.572023	0.686138	0.37695
adgrf7	0.295659	0.460124	0.370207	1.04871	1.33616	1.92663
adgrf8	2.06961	3.18252	1.60423	4.67152	2.78067	2.59677
adgrg11	0.0492765	0.306749	0.452475	0.0953372	0.216675	0.37695
adgrg1	1.92178	1.18865	1.27516	0.953372	0.43335	0.37695
ADGRG2_(1_of_2)	0.14783	0.115031	0.0411341	0.143006	0.216675	0.37695
adgrg2b	0.0492765	0.72853	0.329073	0.238343	1.01115	0.2513
ADGRG3	0	0	0	0	0.0361125	0
adgrg4b	0	0.0383437	0.0411341	0	0	0
adgrg6	0.344936	0.498468	0.781547	0.0953372	0.180563	0.293183
adgrg7.1	0.14783	0.0383437	0.123402	0.238343	0.0361125	0.0418833
adgrg7.2	0	0.0383437	0	0.0476686	0	0.167533
adgrl1a	0.394212	0.153375	0.287939	0.190674	0.252788	0.37695
adgrl2a	126.542	193.367	146.067	135.855	198.655	155.89
adgrl2b.1	32.6211	39.5323	34.964	21.9275	25.4955	23.2871
adgrl3.1	0.936254	0.920248	0.781547	0.381349	0.866701	1.17273
ADGRL3_(2_of_2)	1.23191	0.920248	1.56309	0.33368	0.866701	1.13085
adgrl4	0.14783	0.42178	0.287939	0.66736	0.722251	0.293183
adgrv1	16.4584	15.5292	22.089	4.48085	5.56133	3.05748
adh5	72.0423	64.264	72.6839	70.8355	40.2294	42.8466
adh8a	0.492765	0.383437	0.329073	0.429017	0.397238	0.418833
adh8b	23.8498	16.2961	18.5103	40.423	30.154	35.0145
adhfe1	10.2495	14.954	15.343	26.2177	25.9288	30.1979
adi1	27.7427	23.6197	30.5626	37.5152	25.1343	26.4703
adipoqa	0.0985531	0.383437	0.20567	0.0476686	0	0.12565
adipoqb	0	0.0383437	0	0	0	0
adipor1a	33.0153	32.0937	34.676	24.1203	24.376	29.8628
adipor1b	58.2941	58.5891	59.2331	54.0562	60.0913	63.537
adipor2	178.381	240.415	151.209	99.1983	130.547	100.352
adka	66.5726	72.3545	69.4754	71.4552	77.2086	84.4787
adkb	69.9234	79.9849	79.142	71.5505	63.3053	77.0653
adm2a	0.0985531	0.0766873	0.0822681	0.143006	0	0.209417
adm2b	0.0492765	0.115031	0.123402	0.0476686	0.180563	0.0418833
ADM_(2_of_2)	0.0492765	0.268406	0.0822681	0.0476686	0.0361125	0.167533
adma	0	0.115031	0	0	0	0
admp	70.2683	57.0937	62.9351	16.4457	15.0589	22.9102
adnp2a	18.528	19.5936	19.4153	17.685	21.4508	20.6904
adnp2b	87.0223	105.905	92.5517	92.8107	128.488	117.106
adnpa	249.438	292.907	239.154	228.285	307.282	281.121
adnpb	48.833	57.1321	54.5438	53.2935	70.4195	72.4163
ADO_(3_of_3)	0	0	0	0	0	0
adoa	26.7572	22.8912	22.8705	26.3607	25.2066	26.8053
adob	0.0492765	0	0	0	0	0
adora1	10.9887	16.1043	13.8622	5.72023	6.42803	5.65425
ADORA1_(1_of_2)	0	0	0	0	0	0
adora2aa	11.3829	15.8359	13.5742	10.9161	11.5199	11.0572
adora2ab	49.3258	61.2732	55.5721	47.8593	55.4689	54.574
adora2b	2.80876	3.45093	2.71485	6.10158	4.18905	4.2721
adpgk2	116.194	116.526	121.798	125.082	154.959	145.712
adpgk	14.5859	17.5231	10.9417	15.6353	25.7121	18.3449
adprh	0.837701	0.268406	0.863816	0.143006	0.469463	0.12565
adprhl1	0	0.0383437	0	0.0476686	0	0.12565
adprhl2	11.4814	9.54757	13.0806	10.5348	10.9782	11.6854
adprm	71.4017	73.8116	70.7095	52.9598	50.9187	54.1132
ADRA1A_(2_of_2)	0.0492765	0.115031	0	0	0	0
adra1ab	0.0492765	0	0	0	0.0361125	0
adra1ba	0.542042	0.345093	0.329073	0.0476686	0.108338	0.12565
adra1bb	0.14783	0.115031	0.0411341	0	0.108338	0
adra1d	0.0492765	0.0383437	0.0411341	0.0476686	0.0361125	0.0837666
adra2a	0.0985531	0.230062	0.329073	0.238343	0.397238	0.5026
adra2b	1.4783	1.26534	1.31629	0.381349	0.361125	0.5026
ADRA2B_(1_of_2)	0.295659	0.230062	0.946084	0.190674	0.180563	0.293183
adra2c	0	0	0	0	0	0
adra2da	0.443489	0.153375	0.658145	0.0476686	0.0361125	0.0418833
adra2db	0.0985531	0.115031	0.452475	0	0.14445	0
adrb1	0.542042	0.536811	0.822681	0.0476686	0.469463	0.167533
adrb2a	0.0492765	0.230062	0.164536	0.381349	0.14445	0.209417
adrb2b	0	0	0	0	0.0361125	0.0837666
adrb3a	0.246383	0.651842	0.246804	0	0	0
adrb3b	0	0	0	0	0	0.0837666
adrbk2	53.4158	66.2579	52.8984	55.6292	64.497	65.2961
adrm1	108.211	118.865	105.303	105.729	86.309	83.8923
adsl	116.293	82.6306	88.7262	118.933	86.0562	85.3582
adss	7.44076	8.93408	5.63537	1.76374	1.51673	1.13085
adssl1	52.9723	62.3468	47.263	50.2427	55.0355	38.2814
adssl	246.383	251.304	254.99	231.479	220.72	239.07
ADTRP	0	0	0	0	0	0
AEBP1_(1_of_2)	0.985531	0.766873	0.329073	0.190674	0.14445	0.0418833
aebp1	0.985531	1.76381	1.11062	3.38447	4.36962	2.80618
aebp2	142.656	147.623	140.226	147.63	159.834	163.931
aes	3.30153	3.06749	3.24959	3.52747	3.43069	3.68573
afap1	8.13063	7.74542	8.55589	4.14717	6.10302	6.2825
afap1l1a	0.837701	0.920248	1.6865	0.429017	1.08338	1.34027
afap1l1b	0.788424	0.42178	0.863816	2.19275	2.49177	3.05748
afap1l2	47.0098	51.3805	36.4859	38.5162	63.7025	39.9148
aff2	1.97106	0.996935	1.43969	1.71607	1.7334	1.7591
aff3	1.97106	1.87884	1.9333	0.476686	0.14445	0.0418833
aff4	49.0794	61.3882	47.7567	50.91	71.25	59.4324
afg3l2	14.3887	17.0246	15.3019	18.8291	20.873	22.9102
afmid	3.79429	3.37424	3.12619	8.10366	6.13913	8.50231
afp4	1199.78	637.809	1052.5	1188.62	569.964	632.522
aftpha	21.8295	25.4219	22.3769	24.6923	30.479	29.5277
aftphb	3.69574	5.25308	5.75877	17.6374	22.8592	19.8527
aga	21.2382	14.5706	22.5826	20.4975	13.6144	16.3345
agap1	18.3801	18.4433	20.6904	20.2115	19.7536	23.8735
agap2	0.689871	0.153375	0.370207	0.33368	0.108338	0.2513
AGAP3	19.415	16.7562	15.7543	11.9648	12.206	14.5335
AGBL1	3.49863	3.64265	3.33186	2.14509	1.95008	2.63865
agbl2	1.13336	0.72853	1.02835	0.524354	0.541688	0.335067
agbl4	0.542042	0.383437	0.452475	0.33368	0.180563	0.2513
agbl5	15.3743	18.8267	16.7416	17.7327	26.7233	22.7008
agfg1a	22.3223	22.8912	24.228	17.7327	22.9315	18.5124
agfg1b	18.2323	22.2393	17.0706	18.8291	24.4121	23.2871
AGFG2	11.6785	15.0691	17.194	18.3524	11.1949	10.3033
aggf1	31.537	36.925	35.5398	29.0302	40.6627	40.6268
agk	9.31326	9.73929	7.11619	14.8249	17.3701	8.66985
agla	11.6785	13.3819	13.9445	10.5824	10.1837	9.33998
aglb	0.640595	0.460124	0.534743	0	0.0361125	0.167533
agmat	0.936254	0.575155	0.863816	1.14405	1.04726	1.71722
agmo	1.13336	0.72853	1.23402	0.619692	0.252788	0.837666
ago1	12.2699	12.3467	14.4381	15.0156	18.4174	17.214
ago2	104.762	115.491	106.743	100.295	127.441	120.079
AGO3_(1_of_2)	9.06688	9.01076	9.5431	9.1047	9.7865	10.0101
ago3b	16.9018	17.293	14.8083	12.8228	17.3701	16.2926
ago4	54.352	92.2549	54.9963	51.2914	79.4837	58.7623
agpat2	83.4744	77.8377	77.5789	75.364	107.579	94.0281
agpat3	69.4799	73.0447	65.362	83.5154	99.8873	91.8082
agpat4	38.9777	32.0553	34.5115	29.3162	32.0318	33.0041
agpat5	120.185	133.206	125.747	116.025	136.758	135.702
agpat6	78.941	83.3208	75.152	75.4117	82.3366	84.0179
agpat9	48.2417	56.1735	61.5366	32.4146	38.8571	25.0043
agpat9l	15.5714	21.7025	17.3174	19.4488	16.8646	14.8267
agps	12.7626	12.1933	12.0934	10.5348	16.1062	11.8111
agr1	122.354	72.6613	92.7985	96.3382	61.5358	60.6889
agr2	0.344936	0.153375	0.123402	0.0476686	0.0361125	0.209417
agrn	7.49003	6.63346	7.98001	11.7265	9.2087	10.2614
agrp2	0.0985531	0.0383437	0.370207	0.0476686	0.0361125	0.0418833
agrp	0.0492765	0	0.0411341	0	0	0
agt	0.788424	0.460124	0.493609	1.81141	1.08338	1.42403
agtpbp1	6.60305	7.13192	4.73042	6.5306	6.8975	5.82178
agtr1a	0	0.0383437	0	0	0	0
agtr1b	0.344936	0.383437	0.452475	0.238343	0.650026	0.293183
agtr2	0	0	0.0411341	0	0	0
agtrap	3.30153	4.48621	5.01836	2.19275	1.62506	1.08897
agxt2	1.33047	1.57209	1.23402	3.14613	3.1779	2.47112
agxta	0.0985531	0.115031	0.0411341	0.905703	0.866701	0.544483
agxtb	0.689871	0.383437	0.863816	0.905703	1.51673	2.17793
ahctf1	344.541	408.36	342.811	342.022	459.821	413.472
ahcy	115.898	111.158	105.632	96.4812	82.8061	75.6832
ahcyl1	6.45523	9.16414	10.6949	9.1047	8.37811	7.62276
ahcyl2	62.4334	64.6091	62.1536	41.3763	50.2325	48.7103
AHCYL2_(2_of_2)	2.61166	2.37731	3.12619	4.43318	4.40573	6.36626
ahdc1	1.23191	1.53375	1.06949	1.38239	2.52788	1.5078
ahi1	48.7345	52.8376	51.4176	40.423	59.9468	54.9928
ahnak	23.16	26.3421	35.5398	46.2862	27.9872	37.318
ahr1a	0.295659	0.191718	0.329073	0	0.0361125	0.2513
ahr1b	0.0985531	0.0766873	0.0822681	0	0.252788	0.0837666
ahr2	7.04654	8.55064	9.4197	9.58138	11.7727	10.1358
AHRR_(2_of_2)	0.14783	0.268406	0.0411341	0.143006	0.108338	0.335067
ahrrb	0	0.115031	0	0.0476686	0.108338	0
ahsa1a	1.92178	2.95246	3.24959	2.19275	6.17524	2.88995
ahsa1b	146.745	193.137	184.857	129.182	151.131	137.335
ahsg1	0.14783	0.230062	0.781547	0.190674	0.2889	0.12565
ahsg2	0	0.0766873	0	0	0.0361125	0
aicda	0	0.0383437	0	0.0953372	0	0.0418833
aida	3.25225	3.56596	3.24959	9.1047	7.33085	8.33478
aif1l	266.093	291.144	277.244	401.131	371.959	403.881
aifm1	52.2331	54.1413	38.6249	41.1857	50.7381	41.8414
AIFM2	21.1396	19.4402	20.3202	21.9752	18.8869	21.2348
AIFM3	0.492765	0.306749	0.987218	0.33368	0.325013	0.293183
aifm4	5.32186	5.1764	4.23681	2.66944	2.05841	2.2617
aifm5	0.197106	0.0383437	0.0822681	0.0953372	0	0.0418833
aig1	0.246383	0.115031	0.123402	0.0953372	0.0722251	0.2513
aim1a	35.3313	29.4096	29.2052	26.2654	35.607	36.2291
aim1b	14.0438	15.4142	11.2707	11.6788	18.7424	14.1984
AIM1L	103.776	114.533	99.4622	103.202	171.065	130.299
aimp1	49.6215	37.6151	45.7411	55.5339	32.8985	40.0823
AIMP1_(1_of_2)	0.739148	0.690186	0.452475	2.95545	1.01115	1.67533
aimp2	73.2742	75.5754	69.4343	69.0718	61.608	62.7831
aip	78.7932	64.4941	66.6783	83.4677	63.522	76.2276
aipl1	1.52757	1.18865	1.6865	0.524354	0.361125	0.12565
aire	0.0492765	0.191718	0.164536	0.762697	0.14445	0.62825
ajap1	0.739148	1.61043	1.97444	0.810366	0.938926	1.2565
ajuba	49.8186	52.4925	56.0246	72.9329	91.8342	79.0338
ak1	0.640595	0.460124	0.493609	0.238343	0.2889	0.418833
ak2	140.832	83.9726	121.921	119.791	68.8305	79.4108
ak3	248.206	342.064	315.252	379.394	300.384	345.579
ak4	5.22331	3.91105	5.10063	6.14925	5.41688	5.48671
ak5	0.492765	0.115031	0.411341	0.190674	0.0722251	0.0837666
ak5l	0.788424	0.42178	0.164536	0	0.0361125	0
AK6	51.9867	40.4909	52.775	57.6313	33.9819	41.7577
ak7a	0.640595	0.536811	0.658145	0.286011	0.2889	0.12565
ak7b	0.443489	0.306749	0.452475	0	0.0361125	0.0418833
ak8	0.443489	0.115031	0.370207	0.0953372	0	0.12565
ak9	1.62613	2.22393	1.6865	1.19171	0.938926	1.54968
akap10	16.0641	19.4402	16.9884	16.5887	23.7982	18.9313
akap11	11.7278	13.1519	14.3969	13.4425	14.5172	17.2978
akap12a	2.36527	1.68712	1.72763	1.90674	3.25013	2.21982
akap12b	1756.95	2254.07	1820.76	1806.69	2426.65	1963.74
AKAP13_(1_of_2)	6.3074	7.51536	6.49918	1.62073	1.37228	1.54968
AKAP13_(2_of_2)	35.4791	36.6949	39.283	39.8986	39.3266	38.9096
akap17a	29.4181	28.1826	31.0151	28.1245	36.1125	29.9466
akap1a	3.64646	4.5629	5.18289	4.52852	2.23898	6.49191
akap1b	137.383	173.045	122.826	106.635	144.703	118.362
akap6	0.591318	0.115031	0.946084	0.66736	0.758363	0.712016
akap7	2.71021	2.83743	3.78433	4.05183	4.22517	4.60717
akap8l	507.942	621.091	559.012	567.161	758.002	697.986
akap9	25.8209	46.2041	29.8222	40.709	60.1274	50.5532
akip1	4.63199	3.14418	3.6198	4.67152	2.99734	3.47632
akirin1	153.841	132.592	146.52	171.988	106.315	124.058
akirin2	255.499	268.367	247.915	245.827	225.703	238.819
akna	9.6582	8.58898	8.55589	1.85907	2.63622	4.85846
aknad1	0.14783	0	0.123402	0	0.0722251	0.0418833
akr1a1a	0	0.230062	0.370207	0.66736	0.216675	0.2513
akr1a1b	9.85531	7.63039	11.2296	17.8757	14.0839	10.764
akr1b1	0.492765	0.230062	0.246804	0.66736	0.577801	0.544483
akr7a3	30.7486	25.1151	32.825	28.3628	24.5926	24.0829
AKT1	1.03481	0.920248	0.946084	0.381349	0.613913	0.712016
akt1s1	264.566	275.231	272.801	225.663	218.373	233.583
akt2	188.384	229.487	204.19	163.217	217.939	195.134
akt2l	3.9914	4.40952	5.38856	5.72023	4.80297	4.98411
akt3a	1.87251	1.76381	2.18011	2.19275	1.66118	1.7591
akt3b	2.90732	2.79909	3.7432	1.57306	2.23898	2.97372
aktip	25.8702	30.5983	27.8478	33.94	34.1264	31.4963
AL627261.1	0	0	0	0	0	0
AL627305.1	0.394212	0.575155	0.493609	0.429017	0.866701	0.62825
AL645691.1	0.0492765	0.153375	0	0.0476686	0.180563	0.0418833
AL645691.2	1.42902	1.64878	1.48083	0.33368	0.2889	0.2513
AL645743.1	0	0	0	0	0	0
AL645743.2	0	0	0	0	0	0
AL772250.1	0.0492765	0.0383437	0	0	0	0
AL773593.1	0.0492765	0	0	0.143006	0	0
AL807792.1	0	0	0	0	0	0
AL831726.1	0.443489	0.306749	0.370207	0.0476686	0	0.12565
AL831726.2	0	0	0	0	0	0
AL831768.1	0	0.0383437	0	0	0	0
AL831768.2	0.246383	0.0383437	0.164536	0.0953372	0.0361125	0.12565
AL845295.1	0.246383	0.153375	0.246804	0	0	0.0418833
AL845295.2	0	0	0	0	0	0
AL845295.3	1.77395	0.958592	1.56309	0.66736	1.1556	1.42403
AL845295.4	0	0	0	0	0	0
AL845301.1	0	0	0.0822681	0	0	0
AL845357.1	0	0	0	0	0	0
AL845419.1	0	0	0	0	0	0
AL845428.1	0	0	0	0	0	0
AL928650.1	0.0985531	0	0	0	0	0
AL928685.1	0.0985531	0.115031	0.246804	0.286011	0.108338	0.2513
AL928685.2	0	0	0.0411341	0.0476686	0	0
AL928685.3	0.0985531	0.0766873	0	0.0476686	0.0361125	0.0418833
AL929019.1	0	0	0	0	0	0
AL929028.1	0	0	0	0	0	0
AL929028.2	0	0	0	0	0	0
AL929031.1	0	0	0	0	0	0
AL929119.1	0.394212	0.268406	0.123402	0.286011	0.361125	0.2513
AL929131.1	0	0	0	0	0	0
AL929185.1	0.788424	0.536811	1.06949	0.0476686	0.216675	0.167533
AL929185.2	0	0.115031	0.20567	0.0953372	0.0361125	0
AL929192.1	0.394212	0.0766873	0.493609	0.190674	0.14445	0.0837666
AL929210.1	0	0	0	0	0	0
AL929222.1	0	0	0	0	0	0
AL929252.1	0.0492765	0.0383437	0.0411341	0	0.0361125	0
AL929276.1	0.0492765	0.0766873	0.20567	0.0476686	0.0722251	0.0418833
AL929276.2	0.0492765	0.153375	0	0.143006	0.0361125	0
AL929290.1	0	0	0	0	0	0
AL929291.1	0	0	0.0411341	0	0	0
AL929340.1	0	0	0	0	0	0
AL929349.1	0	0	0	0	0	0
AL929378.1	0	0	0	0	0	0
AL929389.1	0	0	0	0	0	0
AL929434.1	136.496	157.592	142.365	152.968	202.375	186.339
AL929457.1	0	0	0	0	0	0
AL929507.1	0	0	0	0	0	0
AL929507.2	0	0.0383437	0	0	0	0
AL935035.1	0.0492765	0.0383437	0.0411341	0.143006	0.14445	0
AL935044.1	0.0492765	0.0383437	0.246804	0	0.216675	0
AL935044.2	0	0	0.0411341	0.0476686	0.108338	0
AL935065.2	0.197106	0.115031	0.0822681	0	0.0722251	0.209417
AL935174.1	0.443489	0.613499	0.575877	1.14405	0.686138	1.13085
AL935186.1	0.0985531	0	0.0411341	0	0.108338	0
AL935207.1	0	0	0	0	0	0
AL935274.1	0	0	0	0	0	0
AL935274.2	0	0	0	0	0	0
AL935280.1	0.886977	1.53375	1.97444	2.00208	1.19171	2.34547
AL935294.1	0	0	0	0	0	0.0418833
AL935300.1	4.08995	6.74849	5.3063	2.62177	4.11683	3.2669
AL953855.1	0	0	0.0411341	0	0	0
AL953858.1	0.197106	0.191718	0.20567	0.286011	0.2889	0.167533
AL954146.1	0.0985531	0.0766873	0.452475	0.238343	0.0722251	0.167533
AL954146.2	0.197106	0.153375	0.20567	0.0476686	0.0361125	0.2513
AL954146.4	0.0985531	0.0766873	0.0411341	0	0.14445	0
AL954173.2	0.0985531	0.191718	0.329073	0.572023	0.541688	1.04708
AL954183.1	0	0	0	0	0	0
AL954363.1	0	0.0383437	0	0	0	0
AL954715.2	0	0	0	0	0	0
AL954718.1	0	0	0.0411341	0	0	0
AL954741.1	11.6785	14.0338	13.0806	13.8239	17.0812	18.8056
AL954814.1	0	0	0	0	0	0
AL954822.1	0	0	0	0	0	0
AL954822.2	0	0	0	0	0	0
AL954831.1	0	0	0	0	0	0
AL954832.1	0.492765	0.153375	0.90495	0	0	0
AL954861.1	0	0.153375	0.287939	0	0.0722251	0.0418833
alad	15.0293	9.73929	12.0111	12.2985	8.84757	10.8478
alas1	131.519	127.071	122.785	79.5589	81.2893	105.211
alas2	0.246383	0.498468	0.822681	0.33368	0.758363	0.62825
alcama	13.3047	16.5261	20.855	21.2125	13.3616	12.0205
alcamb	1401.18	1690.88	1595.26	2264.35	2621.34	2458.93
aldh16a1	4.87838	5.21474	5.96444	4.57618	4.51407	4.5234
aldh18a1	120.53	89.7242	67.0074	62.5412	86.5979	108.939
aldh1a2	199.176	199.157	191.644	1.04871	1.01115	1.29838
aldh1a3	0.640595	0.383437	0.329073	0.476686	0.758363	0.795783
aldh1l1	16.754	28.3743	19.0039	12.0602	13.2533	16.3345
aldh1l2	106.24	159.931	112.461	60.6344	83.1672	73.6728
aldh2.1	5.76535	5.55983	6.99279	5.9109	6.86138	6.45003
aldh2.2	15.867	13.8421	9.37857	5.33888	6.03079	3.2669
aldh3a1	0.344936	0.345093	0.123402	1.28705	1.04726	0.963316
aldh3a2a	2.61166	2.99081	2.79712	10.3918	11.4477	10.1358
aldh3a2b	6.06101	5.02302	6.99279	8.91402	7.83642	8.92115
aldh3b1	87.3673	106.825	104.398	95.2895	96.5649	99.0959
aldh3b2	0.246383	0.383437	0.329073	0.33368	0.505576	0.87955
aldh4a1	34.7892	38.2286	35.4164	28.7442	36.5098	30.3235
aldh5a1	2.95659	4.52455	4.52475	2.4311	2.49177	1.63345
aldh6a1	53.1694	60.583	55.7778	43.9981	41.71	42.0509
aldh7a1	25.9195	25.0768	25.7499	27.8385	27.8428	24.9206
aldh8a1	1.6754	1.227	1.06949	0.286011	0.505576	0.0418833
aldh9a1a.1	128.907	140.683	149.934	104.633	109.277	110.069
aldh9a1a.2	11.3336	11.7715	10.9828	22.1182	24.5565	23.329
aldh9a1b	27.4963	16.1043	18.4281	21.8799	17.334	22.8683
aldoaa	785.813	825.693	815.648	713.027	558.264	606.931
aldoab	0	0.0383437	0.0411341	0.0476686	0.0722251	0.0837666
aldob	2091.94	1838.23	1895.05	2362.84	1579.06	1967.72
aldoca	0.344936	0.230062	0.493609	0.0476686	0	0
aldocb	3.05514	2.1089	3.78433	2.09742	2.49177	1.84287
alg10	3.00587	3.64265	5.34743	6.33992	8.19755	8.33478
alg11	8.91905	7.09358	7.03393	13.1089	9.85872	11.9786
alg1	7.04654	4.90799	6.25238	6.72127	5.59744	7.07828
alg12	11.5307	8.5123	9.25517	10.7254	9.38926	9.75881
alg13	3.00587	1.64878	2.46804	1.00104	0.975039	1.7591
alg14	5.51897	5.78989	6.17011	3.62281	2.92512	2.42923
alg2	29.1717	33.0906	39.283	38.0395	34.8486	39.3703
alg3	47.1576	52.7992	53.8034	28.0768	38.0987	33.6742
alg5	37.2531	35.3145	36.3214	33.0343	25.1704	31.245
alg6	29.9601	29.2179	33.6065	25.741	24.9177	25.9258
alg8	12.1713	13.497	13.1629	14.4436	15.8534	16.7533
alg9	14.1916	19.4786	16.2891	6.57826	7.65586	7.16205
alk	0.14783	0.0766873	0.0411341	0.0953372	0.216675	0.0418833
alkbh1	8.1799	7.59205	7.363	9.00936	6.68082	9.92635
alkbh2	1.97106	1.38037	2.13897	6.14925	6.24747	8.25101
alkbh3	0.640595	0.805217	0.658145	0.715029	1.1556	1.08897
ALKBH3_(2_of_2)	0.0985531	0.115031	0.0411341	0.190674	0.14445	0.209417
alkbh4	24.0469	16.181	24.1457	22.3089	14.5895	17.4235
alkbh5	18.1338	17.293	23.1173	19.2104	16.8646	17.6329
alkbh6	23.9977	26.3421	28.6293	28.6488	24.4482	25.0043
alkbh7	1.23191	0.651842	0.740413	2.5741	1.98619	2.17793
alkbh8	18.9222	21.7792	19.0451	21.8799	21.0536	20.5228
allc	0.197106	0.115031	0.452475	0.190674	0.397238	0.2513
alms1	28.334	29.3329	24.8861	30.0312	38.8571	38.6583
alox12	100.623	117.677	107.237	102.535	139.792	117.608
alox5a	1.62613	5.63652	5.05949	0.858034	0.722251	0.921433
alox5ap	0.246383	0.115031	0.0411341	0.143006	0.0722251	0.0418833
alox5b.1	12.7626	9.20248	11.6821	8.96169	7.40307	10.0939
alox5b.2	1.6754	2.03221	3.33186	0	0.180563	0.209417
alox5b.3	371.299	327.225	299.456	290.731	299.626	317.392
alp3	0.14783	0.0766873	0.0411341	0.0476686	0.0722251	0.0418833
alpi.1	0.295659	0.805217	0.822681	0.238343	0.252788	0.544483
alpi.2	1.37974	9.62426	7.89774	1.6684	0.938926	1.29838
alpk1	29.8616	24.2715	45.5766	21.9752	24.8454	26.219
alpk2	0.443489	0.268406	0.493609	0.33368	0.216675	0.5026
alpk3a	0.344936	0.42178	0.20567	0.381349	0.0722251	0.209417
alpl	52.3809	49.3867	48.4971	65.9256	69.3361	79.4527
als2a	2.5131	1.68712	2.26237	3.00312	2.52788	2.21982
als2b	49.5229	60.5447	67.2542	86.8045	87.7174	77.8611
alx1	0.197106	0.0383437	0.575877	0	0.108338	0.0418833
ALX3	0.689871	0.651842	1.11062	0.0953372	0.108338	0.167533
alx4a	1.03481	1.45706	0.863816	1.04871	0.902814	0.921433
alx4b	0.0492765	0.0766873	0	0	0.0361125	0
alyref	861.304	872.97	963.648	793.682	725.573	672.981
amacr	1.72468	1.95553	2.09784	0.858034	1.01115	1.08897
ambp	1.52757	2.26228	1.97444	2.52643	2.45565	2.93183
ambra1a	12.0727	16.3344	16.8238	15.0633	19.9341	16.6696
ambra1b	77.512	92.3316	73.4655	82.133	126.863	100.017
amd1	171.63	205.637	171.077	207.263	236.934	218.086
amdhd1	0.394212	0.383437	1.19289	0.286011	0.794476	0.586366
amdhd2	24.8846	21.3574	24.7627	15.1109	9.89484	10.1358
amer1	21.9773	26.5722	23.1996	29.7929	30.3345	28.6482
amer2	0.344936	0.230062	0.534743	0.143006	0.108338	0.0837666
AMER3	0.14783	0.115031	0.123402	0.238343	0.397238	0.167533
amfr	57.3579	66.1045	56.4771	58.0127	81.6866	69.4425
amh	0.492765	0.805217	1.31629	0.953372	1.04726	1.08897
amigo1	0.985531	1.227	1.27516	0.572023	0.252788	0.418833
AMIGO3_(2_of_2)	0.0492765	0	0.0822681	0.143006	0.180563	0.209417
amigo3	0	0.0383437	0	0.0476686	0	0.12565
ammecr1	118.756	157.592	137.47	133.186	180.202	149.23
amn1	3.20297	1.80215	2.26237	3.3368	3.32235	3.39255
amn	0.0985531	0.306749	0.946084	0.715029	0.650026	0.544483
amot	11.4814	10.4678	14.8905	16.3027	16.7201	16.167
AMOTL1	3.3508	3.22087	5.51197	2.66944	2.81678	2.42923
amotl2a	281.27	380.829	292.463	128.657	203.097	152.958
amotl2b	15.0786	15.3375	16.5359	23.0239	21.487	15.7481
ampd1	3.94212	2.1089	1.27516	2.86011	2.6001	2.513
ampd2a	0.591318	0.268406	0.370207	1.62073	1.91396	2.42923
ampd2b	16.4584	25.9587	34.2647	18.6861	16.6479	20.1878
ampd3a	0.0492765	0.0766873	0.0411341	0.0476686	0	0
ampd3b	0.837701	0.881904	0.452475	0.619692	1.55284	0.670133
amph	0	0	0.123402	0.143006	0.252788	0.167533
amt	15.6699	13.8421	11.5998	14.4436	11.881	14.3241
amy2a	0	0.0766873	0.0822681	0.238343	0.0361125	0
AMZ2	0.0985531	0	0	0	0	0.0418833
anapc10	45.2851	25.7669	42.4092	57.9173	27.915	30.4492
anapc11	15.2264	7.20861	14.8905	13.3472	8.19755	7.74841
anapc13	8.27846	4.75462	9.0495	7.81765	6.35581	8.0416
anapc15	14.9801	11.1197	14.726	14.3959	9.28092	11.141
anapc16	37.5487	17.7915	39.2008	31.8426	15.3839	20.4391
anapc1	62.3841	70.8208	59.4387	65.1153	80.856	73.5471
anapc2	28.2354	27.339	27.5598	31.5566	35.8236	37.2762
anapc4	28.5804	30.5599	30.6449	32.939	36.4014	33.2135
anapc5	16.5076	19.6703	18.9217	53.2935	55.2883	59.8931
anapc7	44.546	49.6551	44.4659	37.7058	51.0992	43.6005
and1	0.591318	0.690186	0.411341	0.33368	1.33616	0.62825
and2	0	0	0	0	0.108338	0.0837666
and3	0.197106	0	0.246804	0	0.108338	0.12565
angel1	4.58272	4.10277	8.43248	3.52747	2.34732	2.72242
angel2	67.9031	71.3192	60.9196	72.8376	87.1757	89.5884
angpt1	1.37974	0.42178	0.411341	0.429017	0.325013	0.335067
angpt2a	0.492765	1.11197	0.946084	0.381349	0.975039	0.62825
angpt2b	0	0.0766873	0.123402	0	0.108338	0.0418833
angpt4	0.295659	0.42178	0.329073	0.190674	0.613913	0.293183
angptl1a	0.837701	0.460124	0.411341	1.19171	0.650026	0.7539
angptl1b	0	0	0	0	0	0
angptl2a	0.0985531	0.0766873	0	0.143006	0.252788	0.167533
angptl2b	1.4783	1.38037	1.52196	6.95961	5.38077	5.06788
angptl3	0.689871	0.498468	0.493609	0.66736	0.975039	0.795783
angptl4	21.0904	13.7654	21.7188	64.8769	43.1906	51.3489
angptl5	7.19437	5.63652	5.6765	0.381349	0.252788	0.12565
angptl6	0.837701	1.76381	1.11062	4.76686	4.65852	4.10457
angptl7	7.58859	17.1013	16.4125	0.190674	0.180563	0.0418833
ANK1_(1_of_2)	1.42902	0.651842	0.617011	0.858034	0.505576	1.13085
ank1a	0.0492765	0	0	0	0	0
ank1b	0.14783	0.0766873	0.123402	0.0953372	0.0361125	0.12565
ANK2_(1_of_2)	0.640595	0.881904	1.23402	0.476686	0.325013	0.293183
ank2b	1.4783	1.07362	1.43969	1.33472	1.48061	0.7539
ank3a	0.788424	0.72853	1.19289	0.762697	0.43335	0.837666
ank3b	2.26672	2.37731	4.36021	3.62281	5.99468	3.14125
ankar	0.788424	0.42178	0.534743	0.619692	0.43335	0.586366
ankdd1a	2.41455	4.25615	2.71485	1.76374	3.7557	2.34547
ankdd1b	1.37974	1.18865	1.02835	2.66944	3.21402	3.68573
ankef1a	0.936254	0.498468	0.781547	0.190674	0.216675	0.0837666
ankef1b	0.985531	0.575155	0.452475	0.33368	0.686138	0.586366
ANKFN1	0.246383	0.498468	0.164536	0.33368	0.14445	0.37695
ankfy1	95.7936	97.7764	101.807	73.8863	108.699	98.9284
ankha	2.06961	2.30062	3.90774	1.33472	2.16675	3.2669
ankhb	4.87838	4.14112	5.7999	5.48189	5.95857	5.98931
ankhd1	83.4252	117.14	78.6483	91.8574	137.192	104.038
ankib1a	11.3336	13.6503	12.7927	12.7752	21.7036	15.79
ankib1b	12.3684	12.4234	15.1373	20.6882	24.7732	25.9677
ankk1	4.63199	6.51842	7.40413	9.43838	11.9533	9.59128
ANKLE1	167.885	196.473	165.647	120.077	170.487	158.57
ankle2	29.6152	32.9372	30.9328	28.5535	46.5852	33.7161
ankmy1	0	0.0383437	0.0822681	0.238343	0.108338	0.2513
ankmy2a	17.6903	20.6672	18.5103	17.828	17.9118	18.6381
ankmy2b	0	0.0383437	0	0	0	0
ankra2	21.9773	20.4755	25.1741	25.3597	21.4508	21.6118
ankrd10a	32.966	31.9403	38.666	39.3266	33.6569	42.5535
ankrd10b	20.3512	17.2547	23.7755	24.5017	20.6564	19.8527
ankrd11	119.841	163.037	150.222	129.802	174.64	168.664
ankrd12	29.763	35.6596	30.7272	33.7494	50.8826	38.7002
ankrd13a	26.6586	28.2976	24.3925	29.2685	35.8598	34.3024
ankrd13b	0	0	0.0411341	0.143006	0.252788	0.167533
ankrd13c	83.8194	108.091	84.8185	85.9464	106.171	95.7871
ankrd13d	0.197106	0.536811	0.411341	0.476686	0.794476	0.62825
ankrd16	5.61752	4.86965	6.08784	4.62385	5.45299	5.94743
ankrd1a	0.0985531	0.115031	0.329073	0.572023	0.650026	0.670133
ankrd1b	0.394212	0.230062	0.452475	0.143006	0.216675	0.209417
ankrd22	1.6754	1.15031	3.53753	1.04871	1.22783	0.62825
ankrd24	0.0492765	0.0766873	0.20567	0.143006	0.0722251	0.0418833
ankrd27	19.1193	27.3007	23.3642	24.6447	29.9734	29.0251
ankrd2	0	0	0	0.0953372	0	0.0418833
ankrd28b	58.4912	62.1168	61.4954	75.4117	90.8953	84.8556
ankrd29	0.0985531	0	0.164536	2.24042	2.41954	2.84807
ankrd31	6.3074	6.9402	12.0111	13.1565	10.3282	8.33478
ankrd33aa	0.443489	0.42178	0.411341	0.381349	0.216675	0.2513
ankrd33ab	0	0.0766873	0	0.238343	0	0.0837666
ankrd33ba	0.591318	0.191718	0.287939	2.4311	2.20287	2.513
ankrd33bb	0.197106	0.115031	0.0411341	0.0953372	0.0722251	0.0837666
ANKRD34A	0.0492765	0	0.0411341	0.190674	0.0722251	0.0837666
ankrd34ba	0.344936	0.268406	0.246804	0.190674	0.469463	0.5026
ankrd34bb	0.739148	0.996935	0.658145	1.23938	3.28624	1.63345
ANKRD34C	0.0492765	0.0383437	0.0411341	0	0	0.12565
ankrd37	7.39148	8.28223	12.7104	8.10366	7.90865	9.08868
ankrd39	0.640595	0.42178	0.822681	2.86011	2.27509	3.60197
ankrd40	19.6613	28.4127	22.2124	24.311	29.5039	22.3657
ankrd44	3.3508	4.25615	4.07227	4.05183	6.10302	6.24061
ankrd45	0.197106	0.268406	0.20567	0.286011	0.216675	0.544483
ankrd46a	27.9398	29.4479	27.9712	22.6902	26.8316	27.5173
ankrd46b	4.13923	3.18252	3.6198	3.76582	3.39458	2.84807
ankrd49	13.4032	11.9632	15.1373	8.58034	10.6893	8.7955
ANKRD50_(1_of_2)	41.9836	51.994	36.8973	36.9431	53.0854	44.0613
ANKRD50_(2_of_2)	13.9945	15.6442	12.7927	13.4902	16.7562	15.1618
ANKRD52_(2_of_2)	0.295659	0.613499	0.452475	0.190674	0.2889	0.418833
ankrd52a	63.3696	60.3913	53.5566	63.1132	68.6138	69.0237
ANKRD53	0.640595	0.383437	0.287939	0.381349	0.469463	0.7539
ankrd54	41.885	48.6965	52.3225	27.2664	20.1869	32.5433
ankrd55	0.0492765	0.0766873	0	0.190674	0.14445	0.12565
ANKRD66	0.197106	0.0766873	0.123402	0.0476686	0.0361125	0.0418833
ankrd6a	95.5965	105.177	95.431	25.4074	21.4508	25.13
ankrd6b	38.3371	44.4403	55.2019	32.3193	42.7934	40.7106
ANKRD7	64.4044	73.5048	70.7095	69.8821	91.2564	85.2744
ankrd9	15.4236	9.27917	8.76156	16.255	5.41688	6.32438
anks1aa	11.7278	11.273	11.353	8.24666	13.795	10.8059
anks1ab	0.0492765	0	0	0.0953372	0.0722251	0.0837666
anks1b	2.66093	2.87578	3.33186	3.14613	1.98619	3.0156
anks3	12.8119	13.6503	15.1373	10.9638	12.9283	12.6069
anks4b	5.71608	8.1672	5.34743	5.86324	6.42803	6.61756
ankzf1	20.9425	22.6611	19.7444	33.797	42.1433	29.9466
anln	171.236	184.663	151.127	168.89	211.331	189.815
ano10a	13.9453	13.4203	16.6593	9.39071	11.4838	8.7955
ano10b	1.18264	2.79909	3.12619	2.19275	2.38343	2.68053
ano11	0.542042	1.07362	0.287939	0.381349	0.14445	0.209417
ANO1_(1_of_2)	0.0985531	0.191718	0.20567	0.286011	0.325013	0.167533
ano1	40.1111	47.8912	35.5398	33.5587	49.5103	38.1976
ANO2_(1_of_3)	0.0985531	0.153375	0.0411341	0	0	0
ANO2_(2_of_3)	0	0	0	0	0	0
ano2	0	0.0383437	0.0411341	0.0953372	0.2889	0.335067
ano3	2.85804	2.22393	5.14176	3.24146	3.25013	4.2721
ano5a	19.8092	19.0951	34.4704	11.3928	15.095	13.5283
ano5b	5.71608	4.44787	5.01836	2.52643	3.14179	3.5182
ano6	1.28119	0.958592	0.987218	0.286011	0.613913	0.544483
ANO7	0.197106	0.345093	0.493609	0.190674	0.252788	0.2513
ano8a	1.08408	1.15031	1.35742	0.905703	0.613913	0.670133
ano8b	0.640595	0.805217	1.85103	0.953372	1.40839	0.921433
ANO9_(2_of_2)	50.607	57.4772	34.7994	23.3099	31.2373	27.9362
ano9a	1.52757	1.15031	0.987218	1.00104	0.830588	0.586366
anos1a	0.837701	0.920248	0.164536	0.0953372	0.0361125	0
anos1b	0.0985531	0.115031	0.20567	0.905703	0.469463	0.544483
anp32a	805.573	814.918	861.347	966.242	876.018	1037.49
anp32b	1398.47	1207.06	1281.33	1541.08	1190.67	1457.41
anp32e	2500.78	2872.75	2821.06	2137.03	2424.02	2553
ANPEP_(1_of_5)	0.0985531	0.575155	0.123402	0.238343	0.686138	0.37695
ANPEP_(3_of_5)	0	0.42178	0.164536	0.238343	0.2889	0.209417
ANPEP_(4_of_5)	0.197106	0.115031	0.0822681	0	0	0
anpepa	0.197106	0.383437	0.534743	0.0476686	0.361125	0.460717
anpepb	0.689871	0.766873	0.822681	0.572023	0.325013	0.0837666
antxr1a	0.197106	0.153375	0	0	0.216675	0.0418833
antxr1b	0.14783	0.536811	0.246804	0.190674	0.0722251	0.209417
antxr1c	5.51897	5.75155	6.95166	0.238343	0.43335	0.5026
antxr1d	0.295659	0.268406	0.370207	0.0953372	0.361125	0.167533
antxr2a	0.689871	0.383437	0.575877	0.0953372	0.180563	0.335067
antxr2b	0.14783	0	0.0411341	0	0	0
anxa11a	41.8358	34.7777	30.6038	22.9763	20.223	20.6485
anxa11b	12.6641	12.385	13.1218	12.9659	11.7005	12.565
anxa13	6.20884	4.75462	5.22403	6.38759	6.42803	6.61756
anxa13l	2.75949	2.56903	3.00279	0.190674	0.216675	0.335067
anxa1a	632.563	601.152	579.332	267.468	228.412	247.949
anxa1b	73.8162	89.6092	71.9846	125.702	116.535	131.053
anxa1c	134.623	87.8454	105.221	125.654	91.7981	88.8345
anxa2a	8.67267	6.40339	14.8083	30.5079	33.6569	24.2504
anxa2b	17.7395	11.8482	9.58424	11.1068	7.98087	7.7903
anxa3a	2.06961	1.15031	1.6865	3.47981	1.33616	2.0104
anxa3b	3.94212	1.38037	2.75598	4.62385	6.57248	5.23541
anxa4	12.7133	7.78377	9.46084	3.19379	2.70844	2.13605
anxa5a	0.0492765	0	0.164536	0	0.0722251	0.167533
anxa5b	13.3539	18.7884	17.4408	12.4415	13.1811	13.277
anxa6	68.1002	84.3561	113.9	82.5143	63.7386	63.4532
aoc1	0	0	0	0	0.0361125	0.12565
aoc2	160.099	206.404	153.183	55.2002	67.8916	61.4428
aox5	1.08408	0.843561	1.27516	0.66736	0.975039	0.795783
aox6	2.56238	1.30368	0.863816	0.810366	1.30005	0.5026
ap1ar	47.2069	43.8652	42.5738	48.3359	62.7275	58.3435
ap1b1	67.361	71.7027	65.6911	77.6998	99.5262	93.7349
ap1g1	76.2308	80.3683	73.2598	75.9837	89.848	89.5884
ap1g2	10.7916	12.8068	10.2424	16.5887	18.923	17.591
ap1m1	33.6066	42.6382	38.8717	34.1307	44.7073	43.81
ap1m2	11.3336	8.81904	12.7104	9.2477	9.02814	10.6802
ap1m3	13.9945	14.3405	12.4225	21.2602	30.2623	24.8787
ap1s1	74.6047	74.4251	80.993	76.2697	68.6499	72.7513
ap1s2	43.0677	44.7471	53.5977	41.853	38.3515	44.9827
ap1s3a	0.542042	0.153375	0.164536	0.143006	0.361125	0.0837666
ap1s3b	18.6758	16.6412	21.5131	18.6861	13.6867	15.8738
ap2a1	121.861	128.72	113.036	117.789	156.981	143.995
ap2b1	70.4654	84.0493	64.7862	68.8334	95.3371	73.8403
ap2m1a	92.837	80.4834	99.092	67.6894	61.4274	64.7935
ap2m1b	45.5315	43.405	39.2008	38.7069	43.1545	39.3284
ap2s1	31.5863	30.1381	33.3186	25.9794	26.0371	25.3813
AP3B1	29.4181	28.7961	28.218	16.97	20.5841	18.0936
AP3B2	0.14783	0.191718	0.164536	0.0476686	0.469463	0.335067
ap3d1	51.0012	49.5784	51.0474	45.4758	54.566	60.8983
ap3m1	7.1451	8.35892	8.47362	12.3938	9.71427	9.33998
ap3m2	7.83497	7.01689	4.15454	3.71815	3.06957	2.68053
ap3s2	5.61752	4.17946	5.4297	6.5306	6.17524	4.7747
ap4b1	7.49003	7.13192	6.78712	10.0581	11.4116	10.7221
ap4e1	24.2441	23.3513	22.3358	19.5441	23.7982	22.2819
ap4m1	10.9887	10.1994	10.8594	13.2042	12.6033	15.2874
ap4s1	5.17404	4.94633	6.17011	8.67568	4.83908	6.57568
ap5b1	10.693	11.8865	12.6282	7.29329	11.3755	10.6384
ap5m1	2.46383	3.79602	4.48361	2.28809	2.05841	1.63345
ap5s1	3.94212	3.37424	4.40135	6.33992	3.53903	5.48671
ap5z1	3.44936	5.48315	6.21125	4.76686	6.06691	5.23541
apaf1	19.9077	24.655	22.9117	22.5472	31.8151	30.4911
apba1a	1.23191	1.227	0.699279	0.762697	0.938926	0.7539
apba1b	1.18264	1.41872	1.23402	1.00104	1.62506	0.670133
apba2a	1.33047	0.766873	0.781547	0.619692	1.1556	1.21462
apba2b	0.640595	0.613499	0.287939	1.00104	1.04726	1.46592
APBA3	23.5542	30.9433	22.9117	37.8489	37.3765	38.9934
apbb1	28.1862	28.336	31.92	33.4157	43.335	41.0457
apbb1ip	6.11029	6.0583	5.4297	7.91298	3.10568	3.7695
apbb2b	4.87838	5.25308	6.12898	3.67048	4.11683	3.85327
APBB3	0	0.0766873	0	0	0.0722251	0
apc2	0.197106	0.191718	0.0411341	0.143006	0.0722251	0.335067
apc	95.5472	118.405	95.7601	123.605	159.112	146.969
APCDD1	0.14783	0	0.0822681	0.0476686	0.252788	0.0837666
apcdd1l	0	0	0	0.0953372	0.180563	0.12565
apeh	47.8475	54.333	45.7411	40.7566	49.2214	50.0924
apela	210.312	119.939	185.186	243.777	142.103	167.282
apex1	264.714	301.075	340.59	371.338	353.036	351.946
apex2	3.9914	3.56596	3.66093	5.19588	3.64737	2.80618
APH1A	46.8127	52.4925	54.3792	46.0478	53.0854	54.4483
aph1b	104.22	103.106	103.288	128.133	120.038	115.556
api5	735.206	801.881	723.466	654.919	758.869	776.475
apip	12.0235	8.28223	3.29073	59.9671	26.0371	36.0615
apitd1	24.6383	15.3375	25.5031	26.0747	16.9368	18.9731
APLF_(1_of_2)	1.6754	1.61043	1.8099	1.43006	2.0223	1.04708
APLF_(2_of_2)	0.640595	0.460124	0.575877	0.381349	0.830588	0.5026
apln	0.492765	0.498468	0.329073	0.0953372	0.252788	0.12565
aplnr2	6.15957	7.78377	9.33743	2.95545	4.83908	3.89515
aplnra	137.137	139.073	133.028	28.1721	30.479	34.5956
aplnrb	231.156	247.317	217.147	9.2477	7.94476	6.15685
aplp1	1.28119	1.03528	2.67371	0.0953372	0.577801	0.335067
aplp2	128.907	159.433	145.861	79.8449	121.483	90.2586
apmap	23.8498	23.5047	26.9428	43.2354	45.7907	46.0717
apnl	0.0492765	0.0383437	0.20567	0.238343	0.0361125	0.12565
apoa1a	935.663	700.002	575.054	816.944	382.035	450.455
apoa1b	1058.9	854.68	1009.06	1379.72	881.868	921.14
apoa1bp	2.16817	1.76381	1.85103	2.5741	1.40839	2.34547
apoa2	51.7404	37.0783	61.6188	150.728	46.3685	53.4012
apoa4a	0.246383	0.498468	0.329073	0.524354	0.397238	0.2513
apoa4b.1	5.07548	5.63652	11.7643	19.3534	5.16409	7.95783
apoa4b.2	8.77122	8.32058	8.30908	14.3006	7.40307	8.16725
apoa4b.3	1.03481	0.843561	0.90495	0.238343	0.0722251	0.0418833
apoba	35.8733	91.8331	38.5015	61.6355	36.0764	33.7998
apobb.1	952.466	986.813	1065.58	2641.89	1703.32	1700.67
apobb.2	2.02034	4.5629	6.54032	4.43318	6.6086	5.15165
apobec2a	0.14783	0.153375	0.411341	0.238343	0.252788	0.335067
apobec2b	0	0.0383437	0.0411341	0	0	0
apoc1l	386.328	224.847	327.715	507.003	239.968	286.314
apoc2	78.5961	54.0262	84.5305	71.4552	37.1237	47.3282
apoda.1	0	0.0383437	0.0411341	0.0476686	0.14445	0
apoda.2	5.56825	3.91105	7.11619	3.05079	2.05841	0.62825
apodb	6.89871	2.99081	2.83825	3.67048	1.7334	1.29838
apoea	0.295659	0.306749	0.246804	0.429017	0.722251	0.837666
apoeb	4877	4431.11	4244.54	5927.21	4061.04	4759.41
apof	0.14783	0.230062	0.493609	0.238343	0.469463	0.460717
apol1	0.443489	0.306749	0.329073	2.62177	1.87785	3.2669
APOL4	0.0492765	0.613499	0.0822681	0.572023	0.577801	0.209417
APOLD1_(2_of_4)	1.18264	0.920248	0.987218	2.66944	3.53903	2.68053
APOLD1_(3_of_4)	2.06961	2.07056	2.0567	1.57306	2.05841	2.34547
APOLD1_(4_of_4)	3.05514	3.10584	2.71485	9.05703	13.7228	11.1828
apom	0.197106	0.268406	0.411341	0.619692	0.180563	0.12565
apooa	0	0	0	0	0	0
apoob	4.77982	3.37424	5.47083	2.95545	2.0223	2.80618
apool	7.93352	9.08745	8.92609	7.86532	9.85872	8.50231
apopt1	3.30153	2.22393	3.41413	3.76582	2.20287	2.63865
appa	156.65	183.398	146.602	136.284	180.743	180.391
appb	12.2206	14.1105	14.5615	17.828	16.7562	19.392
appbp2	56.8158	70.7441	61.372	58.2033	73.2723	60.0188
appl1	20.844	22.8912	21.3074	19.2104	29.9012	25.4651
appl2	7.09582	8.39726	7.69207	6.48293	6.8975	5.57048
aprt	23.9484	18.635	25.0095	11.8695	12.8922	12.9001
aptx	34.4936	35.5062	37.1852	20.4022	20.0063	18.8056
aqp10a	5.71608	9.50923	5.84104	3.62281	1.76951	1.96852
aqp10b	0.14783	0.191718	0.123402	0.0953372	0.108338	0.0837666
aqp11	8.96833	12.8451	13.9033	10.1534	16.3951	9.25621
aqp12	11.9742	9.85432	15.5898	19.0674	8.23366	8.25101
aqp1a.1	0.591318	0.0766873	0.164536	0.0476686	0	0
aqp1a.2	0	0.0383437	0	0	0	0
aqp3a	18.3801	16.1427	12.8338	3.90882	3.4668	2.72242
aqp3b	0	0	0	0	0	0
aqp4	0.246383	0.153375	0.452475	0.0953372	0.14445	0.167533
aqp7	0.344936	0.42178	0.246804	0	0.252788	0.0837666
aqp8a.1	0.197106	0.115031	0.123402	0.0953372	0.0722251	0
aqp8a.2	0	0	0.0411341	0	0	0
aqp8b	0.591318	0.345093	0.20567	0.0476686	0	0.167533
aqp9b	1.57685	2.7224	3.00279	0	0	0
aqr	164.14	192.715	162.109	172.894	217.65	195.26
ar	1.92178	1.38037	2.18011	6.91194	8.70312	10.5546
araf	103.431	121.358	105.632	115.406	144.45	125.776
ARAP1	16.3598	25.2301	20.8138	22.9286	23.5815	20.2715
ARAP2	2.46383	1.68712	1.27516	0.810366	1.08338	0.795783
arap3	6.11029	6.9402	6.82826	4.00416	4.55018	4.2721
arcn1a	98.6516	108.129	102.794	93.3827	108.482	107.263
arcn1b	70.0712	62.5002	57.999	61.4925	68.6499	72.8351
AREG	0.492765	0.42178	0.987218	0.286011	0.577801	0.460717
AREL1	51.0505	47.2011	38.9128	50.8147	67.7471	67.1808
arf1	283.586	304.717	275.31	301.694	324.941	331.381
arf1l	131.371	133.474	128.873	209.694	163.987	173.313
arf2	312.118	312.693	287.774	287.871	330.935	313.078
arf3a	0	0	0.20567	0	0	0.12565
arf3b	0.394212	0.690186	0.20567	0.429017	0.216675	0.335067
arf4a	85.9383	80.215	85.9702	58.2987	63.8109	68.5211
arf4b	0.936254	0.460124	0.781547	0.715029	0.938926	0.837666
ARF5	389.432	323.467	349.886	335.968	263.369	335.653
arf6a	36.5632	42.1397	39.3653	33.797	26.001	32.7946
arf6b	158.375	173.85	158.119	149.06	140.839	155.303
ARFGAP1	0	0	0	0	0	0
arfgap2	108.408	128.796	114.764	110.114	137.047	139.848
arfgap3	12.7133	14.724	13.7388	16.827	17.659	18.0517
arfgef1	42.1807	46.8176	44.6716	35.4654	56.6606	45.1502
arfgef2	142.557	152.8	127.228	135.855	188.038	169.167
arfgef3	2.56238	2.7224	1.35742	3.95649	5.16409	3.39255
arfip1	26.6586	30.0231	30.6038	26.9327	33.8013	33.6323
arfip2a	4.33633	1.61043	2.0567	1.28705	1.48061	1.80098
arfip2b	17.4439	17.7531	15.0139	19.1628	21.1619	18.8475
arfrp1	8.47556	7.01689	6.95166	8.38967	10.8699	7.41335
arg1	0.0492765	0.115031	0.287939	0.190674	0.180563	0.12565
arg2	9.36254	15.5292	13.0806	16.3503	18.7063	23.1615
arglu1a	170.3	184.586	197.731	181.236	242.351	239.991
arglu1b	130.534	155.867	146.314	132.233	141.489	156.769
arhgap10	14.2409	18.52	15.7543	15.4446	15.8895	17.5491
arhgap11a	188.335	210.89	171.94	176.755	221.406	220.683
arhgap12a	20.6961	24.885	21.5543	23.2146	30.3345	27.9362
arhgap12b	39.2734	41.7179	37.2675	57.7267	69.3361	68.9818
arhgap1	30.65	29.678	25.9967	31.1753	33.368	35.1401
arhgap15	0.0985531	0.0766873	0.246804	0.0953372	0.43335	0.2513
arhgap17a	5.76535	6.63346	8.55589	8.67568	7.65586	8.71173
arhgap17b	3.64646	4.44787	3.45526	4.05183	5.05576	4.18833
ARHGAP18	1.37974	0.766873	0.822681	0.858034	0.830588	0.963316
arhgap19	40.8502	49.2333	37.5965	33.7017	42.6128	40.3336
arhgap20	2.66093	3.60431	3.90774	3.71815	4.22517	4.56528
arhgap20b	0.591318	0.843561	0.863816	0.33368	0.180563	0.293183
arhgap21a	6.70161	6.9402	6.82826	15.3493	17.5868	18.8894
arhgap21b	136.545	182.823	152.813	180.235	239.571	208.83
arhgap22	0.14783	0	0.164536	0.33368	0.361125	0.418833
ARHGAP22_(2_of_2)	0.197106	0.0766873	0.287939	0.0953372	0.108338	0.2513
arhgap23a	12.9105	17.5614	14.5203	18.5431	25.026	22.8264
arhgap23b	0	0.0766873	0.123402	0.0953372	0.14445	0.0418833
arhgap24	30.8471	42.3314	48.2091	38.7546	37.9182	33.4648
arhgap25	0.0492765	0.153375	0.20567	0.33368	0.216675	0.209417
arhgap27	3.05514	2.30062	3.99001	6.38759	4.3335	3.7695
arhgap27l	3.40008	7.51536	3.33186	5.62489	6.28358	4.43963
ARHGAP28	13.3539	15.6442	13.1218	12.8228	11.231	11.2247
arhgap29a	10.9394	11.6948	15.2607	32.3193	35.1375	24.4599
arhgap29b	10.693	9.01076	10.2013	8.342	12.2422	9.92635
ARHGAP30	0	0	0.0411341	0	0.0722251	0.0418833
arhgap31	0.14783	0.230062	0.0822681	0.0953372	0.0361125	0.12565
arhgap32a	1.4783	1.227	1.48083	0.953372	0.902814	0.460717
arhgap32b	49.9171	49.3483	46.6049	57.0593	62.7997	57.2545
arhgap33	27.447	26.5722	21.8011	30.2219	41.9267	33.6323
arhgap35	53.7114	62.3852	46.7283	38.6592	55.18	51.3071
arhgap35a	36.6125	44.0569	41.1752	48.9556	63.9553	53.8201
ARHGAP39	0.344936	0.383437	0.658145	0.0953372	0.252788	0.0418833
arhgap39	0	0	0	0	0.0361125	0
ARHGAP42_(1_of_2)	0.0492765	0.0766873	0.20567	0.0953372	0.397238	0.293183
arhgap42a	34.5921	34.2026	39.1185	31.0322	33.6569	37.1086
ARHGAP44_(1_of_2)	0.295659	0.230062	0.164536	0.381349	0.325013	0.460717
arhgap44	0.492765	0.613499	0.534743	1.04871	0.613913	0.586366
arhgap4a	1.08408	2.99081	2.09784	1.04871	1.55284	1.71722
arhgap4b	6.01174	4.75462	3.90774	13.4425	20.3314	19.3082
arhgap5	90.4717	126.611	93.3332	89.9506	117.619	100.143
arhgap6	22.5194	23.8881	21.5131	29.6975	30.2623	34.1768
ARHGAP9	0.492765	1.45706	2.30351	1.47773	3.71959	3.22502
arhgdia	85.9383	94.7856	82.9674	68.8334	76.1613	60.6052
arhgdig	31.3399	28.4127	32.3725	28.1721	31.8874	29.7372
arhgef10	5.61752	6.17333	6.08784	1.90674	2.67233	2.17793
arhgef10la	3.1537	3.71934	4.52475	5.62489	11.9171	9.17245
arhgef10lb	4.73055	4.40952	4.77155	4.48085	6.75305	3.72762
arhgef11	71.7959	79.218	77.62	69.5961	99.5262	85.6095
ARHGEF12_(1_of_2)	110.478	132.899	114.558	110.162	135.603	126.278
arhgef12b	74.8018	60.8514	58.5749	84.7547	92.9537	91.2219
ARHGEF15_(1_of_2)	37.598	41.1044	44.0135	40.2799	52.6521	49.883
arhgef15	0.492765	0.115031	0.20567	0	0	0
arhgef16	21.4353	25.4985	25.5443	21.8799	28.8178	27.4336
ARHGEF17	12.3684	22.086	18.5926	17.4944	21.9925	20.4809
arhgef18a	41.6879	40.1842	43.3553	43.5691	53.6993	46.5743
arhgef18b	52.0853	56.5569	50.9651	60.6344	76.703	66.2175
arhgef19	0.394212	0.268406	0.123402	0.429017	0.361125	0.2513
arhgef1a	29.4674	31.5568	28.1768	15.8736	23.437	18.1355
arhgef1b	46.4678	56.5569	48.9495	49.6707	60.2357	58.6785
arhgef2	92.9355	115.683	97.5289	100.056	132.316	125.566
ARHGEF25_(2_of_2)	0.344936	0.613499	1.15175	0.381349	0.180563	0.5026
arhgef25b	0.14783	0.268406	0.246804	0.381349	0.216675	0.335067
arhgef28	2.16817	1.95553	2.30351	1.38239	2.45565	2.13605
arhgef3	3.59719	2.56903	3.66093	0.953372	1.80563	1.5078
arhgef33	0.886977	0.996935	1.23402	0.810366	1.26394	0.795783
arhgef37	19.3164	25.0001	19.621	27.0281	31.454	28.8157
arhgef38	0.886977	0.690186	1.06949	1.43006	1.98619	1.5078
arhgef39	27.3485	25.0384	25.462	15.6353	17.5868	13.1514
arhgef3l	0.344936	0.958592	0.452475	0.286011	0.830588	0.5026
arhgef40	0.492765	0.345093	0.493609	0.524354	0.505576	0.2513
arhgef4	7.44076	5.86658	5.75877	2.5741	3.1779	2.93183
arhgef6	59.4768	89.1107	92.6751	46.8582	53.1215	59.4743
arhgef7a	38.0908	38.3053	34.3881	42.1867	58.0329	49.4223
arhgef7b	33.1138	30.4832	32.825	28.2675	38.2071	35.7265
arhgef9a	0.640595	0.575155	1.06949	1.19171	1.51673	1.2565
arhgef9b	0.640595	0.268406	0.575877	0.286011	0.0361125	0.335067
arid1aa	113.484	147.968	119.7	131.947	186.594	163.345
arid1ab	100.524	150.537	103.411	117.265	192.733	144.12
arid1b	15.4236	15.4525	15.7543	15.4923	21.3425	18.303
arid2	52.7752	54.7164	51.3765	54.7235	67.3499	55.7048
ARID3A	74.5061	85.6981	62.0302	65.2106	96.5649	65.7149
arid3b	391.009	491.988	409.49	325.004	471.413	384.238
arid3c	15.5221	13.7654	17.3586	23.4053	22.787	21.5699
arid4a	128.267	145.936	127.31	146.581	191.505	164.099
arid4b	91.4572	61.5416	106.167	97.0056	68.1083	68.3955
arid5a	0.739148	1.8405	1.39856	0.0476686	0.14445	0.167533
arid5b	1.33047	0.613499	0.946084	1.52539	1.48061	1.88475
ARID5B	11.2843	13.497	13.5331	14.4436	17.5146	18.2611
arih1	58.6883	62.5769	59.7267	60.4914	71.6834	69.4007
arih1l	34.6907	32.6688	40.5582	39.2312	44.6351	41.297
arih2	147.78	153.873	137.881	154.685	172.076	162.214
arl10	1.4783	0.920248	0.699279	1.04871	1.26394	1.29838
arl1	89.6833	70.9358	91.6056	83.2293	53.0854	69.987
arl11	1.23191	0.72853	0.822681	1.71607	0.686138	1.21462
arl11l	0	0	0	0.0476686	0	0
arl13a	3.49863	2.26228	2.83825	1.57306	0.975039	0.963316
arl13b	31.9312	35.0078	33.9356	35.2271	43.8767	44.5639
arl14	0.0492765	0.0383437	0.164536	0.143006	0.108338	0.2513
arl14ep	84.9035	49.8468	82.7206	100.056	52.3632	69.0656
arl15a	1.87251	0.498468	1.64536	0.905703	0.758363	1.63345
arl15b	5.07548	5.29143	5.84104	7.91298	6.21136	6.65945
arl16	14.8815	12.8451	12.0934	13.5379	13.9394	13.8634
arl2	12.6148	12.9218	14.0679	11.1544	11.6644	12.565
arl2bp	9.70748	8.66567	10.4069	16.5887	12.0616	12.0205
arl3	62.4334	63.2287	71.9435	89.4739	91.4731	107.389
arl3l1	1.28119	0.345093	0.740413	0.858034	0.866701	0.921433
arl3l2	7.88424	10.5829	11.1885	11.5358	9.42537	9.63316
arl4aa	27.0528	19.7086	32.8661	18.9721	11.3393	13.9471
arl4ab	14.3887	20.7823	22.2947	14.1099	8.9198	8.58608
arl4ca	0	0	0.0411341	0.0476686	0.0722251	0.0418833
arl4cb	36.8096	42.2164	42.4915	43.0924	31.9957	42.0927
arl4d	102.84	90.3377	103.452	55.7722	38.6404	36.3547
arl5a	37.4502	27.8759	32.5782	34.5121	21.4147	23.5803
arl5c	101.066	92.9451	110.856	103.155	87.5729	113.127
arl6	20.6961	18.1749	17.8111	21.3555	20.0786	21.4443
arl6ip1	24.6383	22.9295	27.5187	27.8385	19.0313	23.5803
arl6ip4	35.1834	31.9403	37.6788	52.2448	32.3207	37.2343
arl6ip5a	191.439	151.342	197.69	129.182	80.7838	98.3001
arl6ip5b	1.18264	0.42178	1.02835	1.81141	0.613913	1.13085
arl6ip6	8.67267	7.70708	4.68928	7.96065	11.0866	9.13056
arl8	62.1377	68.0984	66.5138	71.6459	88.2591	86.5728
arl8a	29.8616	31.1351	39.4476	37.9442	43.0823	38.9096
arl8ba	14.8322	14.0721	12.9984	14.3959	12.7838	14.1147
arl8bb	6.70161	5.13805	4.36021	3.09846	2.78067	2.17793
arl9	33.853	31.4035	29.6577	28.0291	31.3818	29.8209
armc10	5.6668	5.90493	5.05949	8.77102	11.1588	10.2614
armc1	40.5053	47.3928	46.0702	30.4602	39.146	33.758
armc1l	52.036	43.29	54.4204	61.7308	39.6155	48.7522
armc2	0.492765	1.15031	0.370207	0.476686	0.650026	0.670133
armc3	0.640595	0.843561	1.15175	0.286011	0.216675	0.293183
armc4	2.90732	1.87884	2.46804	1.47773	1.08338	1.2565
armc5	24.1948	29.7163	23.94	21.3555	31.8874	26.7634
ARMC6	5.86391	4.71627	4.23681	7.24562	7.54752	7.2877
armc7	3.10442	2.87578	4.11341	3.43214	3.4668	3.7695
armc8	10.7916	10.1611	12.9984	13.3949	17.5868	14.6592
armc9	17.9367	22.1243	23.8166	25.884	29.1067	28.3131
armt1	4.97693	4.75462	3.12619	6.33992	6.93361	5.90555
arnt2	94.3645	103.068	108.471	100.533	113.827	117.483
arnt	31.7834	37.9219	36.8561	35.4654	49.1492	46.1135
arntl1a	12.8119	14.6089	13.4097	16.1596	14.2645	15.6644
arntl1b	1.13336	0.920248	1.43969	1.71607	2.27509	0.921433
arntl2	55.239	68.5968	70.3804	70.9785	99.4539	91.18
arpc1a	100.228	106.442	108.923	118.313	95.6982	108.017
arpc1b	0.197106	0.536811	0.534743	0.381349	0.361125	0.293183
arpc2	179.711	179.87	198.019	260.318	185.691	209.458
arpc3	36.6125	20.974	37.1029	36.0851	15.8895	20.5647
arpc4	92.2457	80.7901	90.4127	72.0749	56.155	58.4691
arpc4l	34.0994	21.2807	28.7527	27.8385	15.1312	16.879
arpc5a	130.435	152.723	132.863	137.905	172.004	159.827
arpc5b	6.99727	7.97548	8.02114	8.05599	6.06691	6.91075
arpc5la	42.3285	32.6305	40.1057	32.653	27.1927	29.9885
arpc5lb	7.39148	6.6718	8.47362	7.29329	5.52522	5.23541
arpp19a	90.8166	112.424	98.1459	98.4356	116.355	109.567
arpp19b	19.6121	17.293	25.1741	23.6436	12.8561	16.9627
arpp21	0.591318	0.42178	0.493609	0.524354	0.613913	1.0052
arr3a	0	0.153375	0.0822681	0.0476686	0	0.0418833
arr3b	3.64646	3.87271	3.90774	9.96273	8.08921	7.62276
arrb1	0.492765	0.42178	0.617011	0.190674	0.108338	0.167533
arrb2a	49.6215	49.5784	49.0318	39.7079	34.9208	36.8992
arrb2b	35.824	49.6551	36.0334	30.2219	36.8709	33.758
arrdc1a	14.8322	19.5936	13.9445	14.3482	17.8757	15.4549
arrdc1b	19.3657	19.0185	13.7799	13.1565	19.7897	15.2036
arrdc2	23.8498	22.201	20.4848	19.1151	21.7397	22.7426
arrdc3a	25.9687	30.3298	24.228	28.1721	36.7626	21.6118
arrdc3b	41.7372	42.8299	27.4364	46.2385	55.1077	36.3966
arsa	2.46383	1.99387	1.52196	1.57306	2.3112	1.46592
arsg	1.6754	1.91718	1.89217	1.95441	1.4445	1.59157
ARSG_(2_of_2)	0	0	0	0	0	0
arsh	4.23778	3.87271	5.6765	3.00312	4.44184	3.2669
ARSI_(1_of_2)	0.492765	0.498468	0.658145	0.810366	0.469463	0.670133
arsia	0.640595	0.805217	1.11062	0.858034	0.866701	0.7539
ARSJ	0.985531	2.07056	1.43969	0.190674	0.650026	0.2513
arsk	2.66093	3.06749	2.63258	5.38655	6.10302	3.39255
art4	0.0492765	0.0766873	0.0822681	0.0476686	0.0722251	0.12565
artna	0.0492765	0	0.164536	0	0	0
artnb	0.0492765	0	0.0411341	0	0	0.0418833
arv1	7.68714	6.78683	8.02114	7.10262	6.6086	5.73801
arvcfa	0.246383	0.230062	0.493609	0.238343	0.325013	0.293183
arvcfb	8.32773	9.43254	8.76156	5.38655	6.78916	3.47632
ARX_(2_of_2)	0.14783	0.115031	0.246804	0.476686	0.252788	0.209417
arxa	0.295659	0.191718	0.493609	1.04871	0.866701	0.837666
as3mt	0.591318	0.42178	0.863816	0.953372	1.37228	0.963316
asah1a	72.5843	82.4772	74.0413	73.3619	59.9468	57.3383
asah1b	9.41182	9.93101	12.9161	6.62593	5.70578	6.24061
asah2	1.08408	1.227	1.43969	2.00208	2.09453	2.42923
asap1a	24.7861	27.1473	22.6237	21.8322	29.6123	23.1615
asap1b	3.00587	2.76074	3.6198	3.47981	3.86404	3.93703
asap2a	55.239	68.8269	64.0458	45.6188	53.1215	55.3279
asap2b	26.7572	32.4387	25.5031	24.454	37.4487	31.0774
asap3	11.7771	10.9663	14.8905	11.8218	14.8784	13.654
asb10	0	0.268406	0.287939	0.0953372	0.0722251	0.335067
asb11	115.553	99.9236	102.3	124.653	114.73	146.801
asb12a	24.8846	26.2654	28.7116	30.4602	24.7732	25.4651
asb12b	0	0	0	0	0	0
asb1	0.788424	0.958592	0.781547	0.762697	1.01115	1.84287
asb13a.1	0.492765	1.15031	0.987218	1.28705	1.69729	1.38215
asb13a.2	0.492765	0.958592	0.699279	1.04871	0.866701	0.837666
asb13b	0.295659	0.306749	0.575877	0.572023	0.975039	0.921433
asb14a	0.394212	0.0766873	0.781547	0	0.216675	0.167533
asb14b	0.0492765	0	0.0822681	0.0476686	0	0
asb15a	0.0492765	0	0	0	0.0361125	0.0418833
asb15b	0.295659	0.153375	0.123402	0.238343	0.216675	0.167533
asb16	0.492765	1.26534	0.329073	2.24042	2.56399	1.71722
asb18	0	0	0.0411341	0	0	0
asb2a.1	0.0985531	0.115031	0.164536	0.0476686	0.108338	0.167533
asb2b	9.21471	6.51842	6.78712	7.5793	10.9421	7.87406
asb3	22.3715	22.3927	22.5415	22.5949	21.9203	23.9991
asb4	0.344936	0.42178	0.617011	0.143006	0.2889	0.0837666
asb5b	1.82323	1.45706	2.18011	0.715029	1.4445	2.55488
asb6	26.0673	26.6872	23.1173	20.3545	23.9426	26.1771
asb7	19.6121	20.859	16.865	25.5504	24.9177	27.2242
asb8	2.5131	3.02915	2.96165	3.09846	2.78067	4.23022
ascc1	12.2699	5.59818	7.81547	12.7275	12.6033	11.853
ascc2	21.6817	23.5047	21.1018	24.311	33.368	26.3446
ascc3	12.9105	14.1872	10.8183	11.8695	13.8672	10.8897
ascl1a	0.443489	0.230062	0.329073	0.619692	0.505576	0.5026
ascl1b	1.82323	2.33896	5.34743	3.52747	2.23898	2.34547
asf1ba	47.0098	31.2117	42.9028	49.766	33.2235	42.1346
asf1bb	13.6003	12.6534	13.9856	19.3058	20.2952	18.4287
ash1l	33.6559	41.7563	35.8689	42.1867	57.8523	52.3123
ash2l	103.431	110.123	115.381	115.024	126.972	137.503
ASIC1_(2_of_2)	1.23191	1.95553	2.01557	2.71711	3.68348	2.30358
asic1a	0.344936	0.766873	0.658145	0.286011	0.325013	0.544483
asic1b	0.492765	0.766873	0.740413	1.90674	1.04726	0.921433
asic1c	0.886977	0.153375	0.370207	0.0953372	0.0722251	0.5026
asic2	1.57685	0.72853	3.00279	0.524354	0.43335	0.7539
ASIC2	0	0	0	0	0	0
ASIC4_(3_of_3)	0	0	0	0.0953372	0	0.209417
asic4a	0	0.115031	0.0822681	0	0	0
asic4b	0.14783	0.42178	0.946084	0	0	0
asip1	0	0	0.0822681	0	0	0
asl	7.3422	6.13499	8.26795	7.86532	7.54752	7.539
asmt	0.0985531	0.153375	0.0411341	0.143006	0.325013	0.586366
asmt2	1.37974	1.15031	2.13897	1.81141	1.30005	2.21982
asmtl	16.212	21.9326	17.194	16.2073	20.9453	17.4235
asna1	80.0251	72.8913	82.9263	82.705	100.176	98.0488
asns	11.6293	28.6811	31.591	32.939	31.5985	32.4596
asnsd1	38.8792	46.0508	43.8078	51.4344	52.2548	57.1707
aspa	4.58272	13.1519	11.0239	9.96273	14.6978	12.0624
aspdh	0	0	0.0822681	0	0	0
ASPG_(1_of_3)	0.542042	0.345093	0.287939	0.476686	0.722251	0.544483
ASPG_(2_of_3)	2.26672	1.227	3.33186	3.14613	5.66967	5.86366
aspg	22.273	21.5491	17.9756	42.5204	40.5183	42.0927
ASPG_(3_of_3)	3.44936	6.90186	7.40413	7.38863	5.38077	6.5338
ASPH	17.6903	15.7976	14.6437	27.7431	31.7429	27.8943
asph	442.947	549.887	493.938	277.526	306.92	320.366
asphd1	0.0985531	0.0766873	0	0	0	0
asphd2	11.1365	13.8037	13.8622	22.8332	21.7036	23.9154
aspm	204.892	264.84	201.31	235.769	309.123	331.506
aspn	0.295659	0.345093	0.699279	0.381349	0.758363	0.795783
aspscr1	0	0	0	0	0	0
asrgl1	1.13336	0.498468	0.699279	0.619692	0.613913	0.418833
ass1	0	0	0	0	0	0
ASTE1_(1_of_2)	8.91905	9.54757	9.4197	12.1078	13.7228	12.2299
aste1	0.246383	0.230062	0.370207	0.381349	0.216675	0.293183
ASTL_(7_of_9)	0.0492765	0	0	0	0.0361125	0.0837666
ASTL_(9_of_9)	0.0985531	0.0766873	0.0822681	0.0953372	0.0361125	0
astn1	3.40008	3.98774	4.36021	1.43006	1.1556	1.38215
asun	49.9171	52.5692	54.297	60.0147	69.3361	67.3065
asxl1	176.361	234.28	168.485	200.256	283.592	232.201
asxl2	8.08135	8.24389	6.86939	6.91194	9.46149	6.61756
asz1	0.640595	0.383437	0.781547	0.66736	0.794476	1.38215
atad1a	5.71608	5.13805	5.84104	5.95857	5.59744	5.90555
atad1b	11.0872	9.04911	9.25517	10.5348	11.0143	11.2666
atad2	89.8311	83.8576	74.7817	85.4221	124.516	100.101
atad2b	33.1138	40.721	34.8406	40.3753	46.9102	43.433
atad3b	12.1713	13.3053	14.109	14.6819	15.7812	14.0309
atad5a	224.11	244.057	227.389	201.733	295.545	247.363
atad5b	20.3512	23.3896	20.1968	22.4042	26.6872	24.9625
atat1	3.49863	2.68406	4.31908	4.52852	4.15294	3.5182
atcaya	2.11889	1.41872	1.72763	5.0052	5.05576	3.72762
atcayb	0.197106	0.0766873	0.164536	0.190674	0.216675	0.0837666
ATE1	0	0	0	0	0	0
atf1	90.2253	101.649	95.8835	84.4211	84.1422	84.353
atf2	1.77395	1.91718	1.43969	1.76374	2.38343	2.30358
atf3	5.81463	12.1166	6.86939	3.86115	4.94742	5.40295
atf4a	393.473	537.233	428.206	395.03	374.595	395.546
atf4b	63.5174	117.063	81.0341	59.2997	60.8135	62.825
atf5a	1.77395	2.56903	2.01557	0.762697	0.43335	0.921433
atf5b	16.1627	20.2071	16.865	14.8726	13.9756	14.0309
atf6	79.7787	93.0984	85.4766	69.8345	91.0758	93.6092
ATF6B	0	0	0	0	0	0
atf7a	3.94212	6.55677	4.27794	5.14821	7.61975	4.85846
atf7b	7.49003	10.0077	8.80269	9.53372	11.3755	11.5179
atf7ip2	25.1803	28.2209	28.9584	33.8447	27.3011	32.1664
atf7ip	187.251	360.776	252.316	326.005	477.913	489.532
atg101	6.99727	6.28836	10.4892	10.7254	7.1864	8.37666
atg10	1.4783	1.26534	1.85103	1.28705	0.758363	1.0052
atg12	6.75088	3.83437	5.84104	4.19484	2.6001	3.47632
atg13	72.535	77.2625	75.2342	80.5122	75.403	78.8244
ATG14	24.4904	24.0415	26.9428	24.2633	29.3234	27.3079
atg16l1	40.1604	40.2609	41.0518	51.8157	58.5384	62.6993
atg16l2	6.84944	9.24083	11.6409	3.76582	2.92512	2.63865
ATG2A	15.7685	14.1105	12.9161	14.5389	20.9814	17.3397
atg2b	5.12476	5.09971	5.47083	6.24458	6.53637	6.2825
atg3	35.5284	36.6182	38.9951	32.5576	22.0648	28.8995
atg4a	23.8006	24.0798	27.6832	19.5918	23.0759	23.706
atg4b	7.9828	9.3942	8.18568	12.7275	9.67816	9.50751
atg4c	39.9633	42.0247	40.5171	26.6467	28.4567	30.3235
atg4da	10.693	9.43254	10.5715	12.8705	15.4923	13.6958
atg4db	6.84944	5.98161	7.363	4.00416	4.91131	4.85846
atg5	3.74502	4.8313	4.77155	6.10158	6.28358	6.82698
ATG7	7.1451	9.62426	6.91052	6.29225	8.08921	6.07308
atg9a	0.689871	0.498468	0.863816	0.33368	1.01115	0.2513
atg9b	23.2585	32.6305	24.0223	23.4529	35.282	28.5225
athl1	8.32773	4.40952	3.57866	1.76374	2.23898	3.56008
atic	171.827	186.772	177.041	127.656	110.793	105.713
atl1	0.739148	0.460124	0.740413	1.00104	1.30005	1.67533
atl2	57.3579	64.8008	58.0402	31.3659	34.5236	34.093
atl3	14.1916	15.4525	14.9317	18.0187	20.9453	20.7741
atm	14.7337	24.9234	19.4153	18.7814	23.9065	19.2244
atmin	9.75675	8.35892	9.2963	8.29433	9.96706	10.1358
atn1	4.92765	3.10584	3.94887	5.9109	4.40573	5.10976
atoh1a	0	0	0.123402	0	0.0361125	0
atoh1b	0	0	0	0	0	0
atoh1c	0.542042	0.498468	1.31629	0.476686	0.216675	0.293183
atoh7	0	0	0	0	0	0
atoh8	7.83497	5.71321	6.58145	3.76582	2.13064	3.0156
atox1	14.2409	6.82517	12.7516	15.2063	7.65586	7.7903
atp10a	44.546	50.7287	55.1197	36.8955	46.9824	47.2025
atp10b	0.394212	0.460124	0.452475	3.81349	3.61125	3.64385
atp10d	3.1537	3.14418	3.70207	3.95649	5.09187	4.94223
atp11a	10.9887	18.9418	16.7004	11.2498	14.3728	14.0728
ATP11B	21.2382	19.4402	17.5642	15.7306	20.8008	15.3293
atp11c	15.6699	13.5737	20.4436	15.7306	20.4397	20.9835
atp13a1	172.074	173.927	137.018	167.936	195.513	176.119
atp13a2	14.5859	17.293	15.0139	10.5824	13.8672	15.3293
ATP13A3	15.325	14.6856	15.8366	15.7783	19.5369	17.0046
atp1a1a.1	351.489	367.102	310.521	314.851	381.023	334.983
atp1a1a.2	0.0492765	0.191718	0	0.238343	0.252788	0.12565
atp1a1a.3	3.20297	0.881904	0.946084	1.19171	0.866701	0.209417
atp1a1a.4	0.246383	0.153375	0.123402	0.0953372	0.14445	0
atp1a1a.5	0.640595	0.306749	0.534743	0.572023	0.577801	0.12565
atp1a1b	15.1772	8.97242	12.258	3.05079	3.43069	1.84287
atp1a2a	0	0.268406	0.329073	0.143006	0.2889	0.0418833
atp1a3a	0.443489	0.191718	0.411341	0.143006	0.2889	0.167533
atp1a3b	0.788424	1.64878	1.02835	1.09638	1.58895	0.87955
atp1b1a	255.794	277.225	268.482	226.998	280.161	267.383
atp1b1b	5.07548	2.03221	1.89217	0.953372	1.58895	0.167533
atp1b2a	38.6328	49.8084	52.9396	58.537	73.2362	66.762
atp1b2b	0.394212	0.690186	1.15175	0.572023	0.794476	0.837666
atp1b3a	108.063	126.649	138.087	118.218	102.993	101.609
atp1b3b	12.6148	9.77764	7.98001	8.67568	7.54752	7.49711
atp1b4	0.394212	0.268406	0.246804	0.66736	0.830588	1.04708
atp2a1	0.936254	1.41872	1.43969	1.47773	1.84174	2.21982
atp2a1l	0	0	0.0411341	0.0953372	0	0
atp2a2a	26.1658	34.2409	25.5443	9.05703	11.7005	10.8478
atp2a2b	547.167	562.348	515.574	500.282	650.459	635.328
atp2a3	18.4294	18.7117	11.4353	11.1068	13.2172	7.49711
atp2b1a	441.222	485.891	457.905	423.821	469.138	397.263
atp2b1b	1.23191	0.920248	0.987218	0.905703	1.26394	2.0104
atp2b2	0.739148	0.690186	0.370207	0.238343	0.2889	0.586366
atp2b3a	0.295659	0.42178	0.246804	0	0.43335	0.12565
atp2b3b	0.739148	0.958592	1.35742	0.715029	1.58895	0.712016
atp2b4	158.868	190.3	136.894	178.376	231.012	189.857
atp2c1	33.9515	34.471	34.5938	34.9887	37.557	38.8258
atp5a1	459.504	463.038	440.916	436.12	374.234	427.88
atp5b	602.455	576.727	538.404	672.604	480.55	650.867
atp5c1	86.0861	58.8575	86.0525	92.8107	43.1545	55.621
atp5d	51.1983	28.7961	47.4687	51.3391	24.6649	27.7686
atp5e	47.5026	19.7086	34.2647	28.1721	13.795	20.8579
atp5f1	145.957	100.039	150.715	136.427	68.2888	88.3738
atp5g1	52.8737	26.9173	48.4148	31.1276	15.4201	12.9838
atp5g3a	127.429	97.7764	123.484	138.191	75.9808	89.3371
atp5g3b	234.458	126.534	229.364	196.204	92.3398	116.226
atp5h	48.291	31.5568	49.3198	55.6769	25.8927	35.6846
atp5ia	9.46109	3.52762	6.95166	5.9109	2.96123	3.14125
atp5ib	19.3657	7.82211	13.6976	14.9203	8.45033	8.87926
atp5j	37.1545	18.6734	33.0718	35.1317	20.4036	23.9573
ATP5J2	2.75949	3.91105	4.85382	4.2425	2.56399	3.97892
ATP5J_(2_of_3)	5.51897	3.98774	3.8666	4.05183	4.29739	4.56528
ATP5J_(3_of_3)	0.0492765	0.345093	0.0411341	0.0476686	0	0
atp5l	52.923	23.3896	40.188	31.5089	15.4562	19.015
atp5o	64.2073	38.7271	55.8601	121.364	59.694	71.9555
atp5s	0.837701	0.536811	0.658145	0.810366	0.866701	0.87955
ATP5SL	3.74502	1.30368	3.99001	4.81453	2.38343	2.97372
atp6ap1a	0.394212	0.613499	0.411341	0.0953372	0.325013	0.12565
atp6ap1b	89.0427	85.9282	86.9163	66.1163	65.5081	62.6993
atp6ap1la	0	0.115031	0.0822681	0.0476686	0.252788	0.0418833
atp6ap1lb	0.344936	0.0383437	0.0411341	0.381349	0.108338	0.209417
atp6ap2	30.3543	31.5185	39.8178	49.0986	28.6734	36.271
atp6v0a1a	25.131	25.2685	23.2408	24.8353	28.1317	23.8316
atp6v0a1b	0.0985531	0.153375	0.370207	0.0476686	0.0722251	0.209417
atp6v0a2a	0.739148	1.41872	2.01557	0.810366	0.830588	0.921433
atp6v0a2b	43.4126	43.0983	41.2986	30.3172	35.7153	29.6534
ATP6V0A4	0.246383	0.0766873	0.246804	0.0953372	0.180563	0.12565
atp6v0b	43.4126	38.1136	40.5582	29.9835	33.1152	26.7216
atp6v0ca	162.859	167.6	162.85	120.077	101.837	110.153
atp6v0cb	27.7427	24.6166	24.3514	14.1576	9.53371	8.71173
atp6v0d1	31.7834	36.3498	38.8306	12.9182	13.6867	14.1147
atp6v0e1	25.2296	16.9096	29.3286	26.3607	17.0812	17.8004
atp6v1aa	18.1338	21.8942	22.8705	22.9286	22.8231	21.8212
atp6v1ab	82.5382	95.284	88.6851	67.2127	54.4938	55.1603
atp6v1b2	2.36527	1.72547	2.22124	3.95649	3.68348	3.64385
atp6v1ba	102.397	101.074	102.917	80.5599	75.6197	78.3637
atp6v1c1a	27.792	31.6335	32.5782	30.6032	25.3871	27.5173
atp6v1c1b	3.69574	4.10277	5.22403	3.24146	2.20287	2.47112
atp6v1c2	0.0492765	0.0383437	0.164536	0.0953372	0.0361125	0.12565
atp6v1d	20.8932	31.2884	26.4903	24.1203	27.0483	23.0777
atp6v1e1a	12.7626	11.7715	11.4764	12.4892	13.3978	11.6436
atp6v1e1b	28.9253	29.0262	29.0818	24.883	15.5645	17.2978
atp6v1f	23.4556	16.6795	23.9812	13.9192	7.83642	9.92635
atp6v1g1	46.3199	33.3973	51.7878	40.3753	19.0674	24.6693
atp6v1h	17.099	18.5583	22.4592	15.54	13.5422	13.5283
atp7a	44.2503	37.04	43.3553	32.7483	43.1906	45.5272
ATP7B	0.443489	0.268406	0.123402	0.0476686	0.180563	0.293183
atp8a1	2.26672	2.18559	2.92052	3.28913	3.71959	3.60197
atp8a2	23.4556	28.0292	36.8561	20.1161	14.6978	18.9731
atp8b1	70.0219	80.1766	65.9379	44.8085	64.0998	53.6944
atp8b2	0	0	0.0822681	0	0	0
atp8b3	23.9484	27.9525	29.8633	21.7845	24.1593	21.905
atp8b4	1.13336	0.920248	0.658145	0.143006	0.541688	0.712016
atp8b5a	0.344936	0.575155	0.658145	0.810366	0.325013	0.7539
atp9b	6.60305	7.05524	5.75877	7.72231	9.7865	8.50231
atpaf1	42.5256	35.2762	43.1085	38.5162	27.915	35.4752
atpaf2	19.6613	17.7148	17.0706	24.883	14.9867	20.4809
atpif1a	102.249	52.9526	97.4466	90.0459	54.4938	60.7308
atpif1b	8.1799	4.29449	7.28073	9.67672	5.38077	5.86366
atpv0e2	0.14783	0.115031	0.164536	0.524354	0.0361125	0.12565
atr	18.8236	14.4556	15.5075	6.5306	10.0032	11.3504
atraid	2.21744	1.72547	1.97444	1.47773	1.40839	1.5078
atrip	10.0524	10.8513	12.3814	14.7773	18.3813	16.8371
atrn	70.7611	70.4373	75.0285	54.8189	64.1359	48.5428
atrnl1a	0.739148	0.115031	0.493609	3.09846	2.41954	2.7643
atrnl1b	33.9515	31.3268	32.5782	16.8747	21.8481	24.3761
atrx	454.083	509.012	475.016	446.416	582.495	583.1
atrxl	112.843	132.247	121.099	149.203	184.68	194.841
atxn10	2.85804	3.52762	3.57866	4.8622	4.69463	5.94743
atxn1a	0.344936	0.498468	0.575877	0.286011	0.14445	0.418833
atxn1b	1.18264	0.191718	0.411341	0.238343	0.252788	0.460717
atxn1l	17.4439	18.635	16.2891	15.9213	22.1009	21.1511
atxn2	16.9018	20.4755	18.5103	10.4871	9.53371	6.2825
atxn2l	64.5523	85.5831	68.7762	57.107	81.6505	60.3957
atxn3	28.1862	26.7255	33.1129	41.996	44.5629	50.0087
atxn7	11.3336	10.0844	10.3658	11.2975	13.7589	12.188
atxn7l1	1.28119	1.72547	1.43969	2.47877	4.15294	3.43443
atxn7l2a	23.4064	26.0737	20.8961	24.9783	30.0095	28.5644
atxn7l2b	8.8205	8.62733	8.51475	7.76998	9.35315	12.8163
atxn7l3	3.59719	4.2178	4.15454	6.24458	5.66967	5.61236
auh	7.73641	5.40646	6.95166	3.71815	3.50292	3.2669
aup1	59.0333	75.537	63.6755	71.7412	73.9224	73.0026
aurka	129.548	124.042	117.52	147.82	119.28	136.414
aurkaip1	58.4912	35.6596	53.9268	64.8769	30.8762	39.3703
aurkb	223.37	197.317	209.331	200.446	154.995	182.988
auts2a	1.77395	2.07056	2.50918	3.24146	1.91396	1.80098
auts2b	32.2268	38.267	39.8178	54.9619	61.5358	59.8931
avd	15.1279	5.82824	11.4764	9.48605	4.47796	4.18833
aven	22.4701	23.7731	21.3074	30.4126	22.9315	27.5592
avil	0.640595	0.306749	0.370207	0.238343	0.108338	0.2513
avl9	19.07	18.7501	22.089	21.2602	21.6675	23.6641
avp	0.0985531	0	0	0	0.108338	0
avpr1aa	0	0	0.0411341	0	0	0
avpr1ab	0.197106	0.881904	0.493609	0.286011	0.397238	0.2513
avpr2aa	0.0985531	0.498468	0.287939	0	0	0
avpr2ab	0.0985531	0.0383437	0.0411341	0.286011	0.14445	0.293183
avpr2l	3.3508	3.06749	2.13897	0.762697	0.866701	1.92663
axdnd1	0.0985531	0.153375	0.123402	0	0.14445	0.0837666
axin1	144.479	179.525	152.443	152.349	218.625	185.124
axin2	198.437	246.895	199.336	129.087	162.362	140.435
AZI2	9.46109	8.97242	9.83104	9.00936	9.67816	10.8478
azin1a	24.3919	21.5108	18.7983	30.9369	31.6346	30.0303
azin1b	208.883	225.461	194.523	224.138	248.49	259.718
b2m	0.886977	0.651842	0.740413	17.542	11.3032	9.21433
B2M_(3_of_3)	0.344936	0.306749	0.20567	0	0	0.0837666
b2ml	11.1365	7.5537	11.5175	7.10262	9.46149	8.58608
b3galnt2	10.7423	9.81598	14.1501	12.3938	14.7339	12.9838
B3GALT1	0.443489	0.651842	0.411341	0.0476686	0	0.0418833
b3galt1a	1.77395	1.72547	2.38578	1.47773	3.06957	2.17793
b3galt2	20.3512	22.0476	18.5515	5.10054	6.10302	6.24061
b3galt4	0	0	0.0411341	0	0.0361125	0.0418833
b3galt6	16.7047	20.1304	22.5003	22.7856	31.2012	29.444
b3gat1a	0.0492765	0.0766873	0.0822681	0.190674	0.216675	0.544483
b3gat2	0.542042	0.230062	0.493609	0.476686	0.613913	0.795783
b3gat3	37.8444	41.5262	39.4887	48.908	53.3382	56.3331
b3glcta	1.87251	1.227	1.72763	2.04975	1.51673	2.13605
b3glctb	0.739148	0.306749	0.575877	0.715029	0.505576	0.670133
b3gnt2a	0.14783	0	0.123402	0.0476686	0.469463	0.167533
b3gnt2b	603.44	721.896	628.775	584.369	612.144	580.168
b3gnt2l	4.63199	2.95246	2.18011	6.05391	5.92246	4.5234
b3gnt3	0.295659	0.230062	0.20567	1.19171	0.902814	0.795783
B3GNT3_(1_of_4)	7.29293	8.28223	6.82826	18.3524	10.9782	16.167
B3GNT3_(2_of_4)	0.492765	0.191718	0.164536	1.62073	0.613913	1.0052
B3GNT3_(4_of_4)	2.95659	4.71627	3.08506	10.5348	10.3282	9.46563
b3gnt5a	78.6946	98.2748	80.1292	57.679	63.9192	58.4691
b3gnt5b	15.7192	13.6887	17.2352	7.67464	4.80297	7.70653
b3gnt7	1.62613	2.30062	2.26237	3.71815	3.7557	1.59157
b3gnt7l	2.56238	2.95246	3.08506	0.953372	0.577801	0.712016
b3gnt9	1.72468	1.30368	1.9333	1.81141	1.87785	3.0156
b3gntl1	25.6731	27.0323	30.8506	21.8799	29.829	24.1667
b4galnt1a	0.197106	0.230062	0.20567	0.190674	0.577801	0.167533
b4galnt1b	0.443489	0.460124	0.452475	0.429017	0.469463	0.460717
b4galnt2.1	0	0.0383437	0.123402	0	0.14445	0.0837666
b4galnt2.2	0.197106	0.230062	0.20567	0.238343	0.252788	0.2513
B4GALNT2_(2_of_3)	0.542042	0.536811	0.740413	0.143006	0.397238	0.293183
b4galnt3a	0.443489	0.115031	0.287939	0.429017	0.469463	0.209417
b4galnt3b	26.6586	21.2424	23.3642	32.939	33.2235	36.6898
b4galnt4a	0.14783	0.306749	0.123402	0.381349	0.722251	0.2513
b4galnt4b	0.0492765	0.345093	0.246804	0.0476686	0.0361125	0.12565
b4galt1	22.5194	25.5752	22.5826	22.8332	25.8927	23.8735
b4galt1l	79.5323	72.8913	58.3692	78.7008	86.4895	76.9815
b4galt2	0.689871	0.345093	0.287939	0.810366	0.325013	0.167533
b4galt3	3.10442	4.10277	4.03114	1.90674	3.28624	2.47112
b4galt4	38.7314	42.6765	40.8461	36.7048	47.4158	43.4749
b4galt5	1.03481	0.498468	0.452475	0.190674	0.397238	0.209417
b4galt6	149.061	152.301	150.756	105.348	140.875	123.221
b4galt7	30.7978	29.1795	29.3697	33.8447	30.479	37.9882
b4gat1	5.91318	9.43254	8.96723	5.05287	7.04195	7.24581
b9d1	10.2002	9.04911	8.14455	17.685	11.1227	14.0309
b9d2	16.754	11.6565	14.1913	13.5379	9.53371	8.50231
ba1	0	0	0	0	0.0361125	0
ba1l	0	0	0	0	0	0
BAALC	0.295659	0.536811	0.946084	0.810366	1.01115	0.544483
babam1	28.9253	29.2179	29.2463	35.2271	33.693	35.7265
BACE1	0.591318	0.306749	1.31629	0.143006	0.2889	0.2513
bace2	2.02034	1.11197	1.76877	1.04871	1.66118	2.72242
bach1a	2.5131	3.75768	3.41413	2.81245	3.90015	3.60197
bach1b	14.9801	20.2455	21.3486	16.0166	17.8757	14.4916
bach2a	4.73055	5.02302	4.81269	2.95545	2.78067	5.19353
bach2b	6.89871	7.82211	8.22681	6.5306	9.7865	8.20913
bada	1.57685	1.76381	2.50918	1.95441	2.23898	3.39255
badb	14.4873	12.3467	17.1529	15.4923	10.4365	13.2351
bag1	10.151	9.85432	13.492	14.7773	11.1949	11.6017
bag2	0.837701	0.306749	0.575877	0.286011	0.505576	0.167533
bag3	7.04654	5.98161	5.22403	4.48085	7.25862	4.69093
bag4	4.53344	6.25002	5.96444	2.33576	3.93627	3.05748
bag5	11.4322	10.8513	11.8466	11.6311	12.4588	10.8478
BAG6_(2_of_2)	25.3281	23.3896	18.5515	19.0198	26.8316	21.6537
bag6	67.5088	101.956	67.2131	58.7277	93.8204	80.1647
bahcc1	6.80016	7.05524	6.78712	5.05287	7.1864	5.90555
BAHCC1_(2_of_2)	14.8322	18.5967	17.4408	18.0664	26.7955	19.9783
BAHD1_(2_of_2)	1.6754	1.57209	2.0567	1.14405	2.34732	1.88475
bahd1	28.1369	33.8191	33.1541	36.0374	41.1683	30.7005
baiap2a	2.61166	2.07056	2.71485	3.3368	3.1779	4.2721
baiap2b	0.246383	0.153375	0.123402	0.0953372	0.325013	0.209417
baiap2l1a	32.3747	33.2823	29.9045	28.3628	35.2458	23.5384
baiap2l1b	6.99727	6.90186	8.18568	5.52956	5.70578	4.81658
baiap2l2a	0.394212	0.268406	0.20567	0.0953372	0.43335	0.5026
baiap2l2b	1.77395	3.06749	3.04392	0.429017	1.08338	0.87955
baiap3	0.443489	0.153375	0.287939	0.143006	0.43335	0.712016
bambia	359.866	334.28	346.801	615.926	516.409	558.933
bambib	9.95386	9.93101	12.1346	24.454	11.0866	13.654
banf1	400.421	283.59	397.355	405.564	257.663	305.623
banp	27.1514	36.8866	31.5087	46.0478	47.0185	46.658
bap1	60.413	66.0661	61.7011	66.6407	84.2867	84.0598
bard1	23.8991	26.4188	24.5159	12.2032	15.0228	14.2403
barhl1a	5.76535	6.71014	6.33465	6.29225	7.29473	6.91075
barhl1b	0	0	0.0411341	0	0	0
barhl2	1.08408	1.91718	1.85103	9.8674	7.33085	7.74841
barx1	0.0492765	0.115031	0.123402	0.0476686	0.0361125	0
barx2	0.0985531	0.191718	0.0411341	0	0.108338	0.167533
basp1	0.394212	0.230062	0.658145	0.0953372	0.0361125	0
batf	0.197106	0.345093	0.164536	0.476686	0.361125	0.544483
batf3	1.18264	1.18865	1.15175	0.572023	0.650026	0.7539
baxa	56.9637	49.3867	49.8545	37.6105	34.7403	41.1713
baxb	4.58272	3.68099	5.38856	3.52747	3.79182	3.0156
BAZ1A_(1_of_2)	19.6613	21.089	20.567	34.083	38.171	32.5433
baz1a	52.6766	57.0554	52.4048	78.2718	102.885	85.1907
baz1b	199.471	227.646	198.225	225.472	356.972	296.743
baz2a	304.627	433.552	271.115	284.581	505.539	390.353
BAZ2B_(2_of_2)	0.886977	1.61043	0.863816	0.905703	1.40839	1.42403
baz2ba	36.2182	46.7793	40.7639	46.9059	59.8385	50.1343
bbc3	20.499	10.8896	6.21125	8.62801	7.90865	6.40815
bbip1	11.7771	5.86658	12.1757	8.53268	5.74189	7.41335
BBOF1_(1_of_2)	0.197106	0.153375	0.329073	0.0476686	0.0361125	0.12565
BBOF1_(2_of_2)	1.08408	1.34203	1.72763	0.238343	0	0.0837666
bbox1	5.37114	3.75768	3.24959	6.76894	3.93627	3.72762
bbs10	3.25225	3.56596	4.07227	4.05183	5.74189	5.19353
bbs12	2.80876	3.06749	3.66093	4.67152	5.85023	4.7747
bbs1	4.73055	6.63346	4.31908	6.72127	8.73923	8.08348
bbs2	6.89871	5.94327	7.19846	4.62385	3.10568	3.5182
bbs4	1.77395	1.30368	1.27516	1.71607	1.11949	2.72242
bbs5	2.61166	2.30062	3.6198	5.52956	5.20021	5.69613
bbs7	7.93352	9.12579	9.25517	6.57826	6.78916	7.2877
bbs9	3.49863	2.26228	2.34464	2.95545	3.35847	2.38735
bbx	14.6844	18.0982	21.8833	8.81869	10.9782	12.4812
bc2	55.9289	49.9235	56.7239	52.7691	44.6351	48.6684
bcam	6.45523	5.06136	6.49918	7.5793	5.56133	3.30878
bcan	0.394212	0.690186	0.329073	0	0.14445	0.460717
bcap29	7.68714	8.35892	11.0239	13.1089	17.6229	17.2559
bcap31	31.0935	20.3221	28.6704	25.169	21.7036	22.3238
bcar1	14.4873	20.6289	19.621	31.7949	37.6293	33.3391
bcar3	71.451	87.5003	59.1097	74.8397	85.984	86.6985
bcas2	170.99	150.422	193.371	148.249	91.762	109.106
bcas3	25.5252	21.2807	13.204	6.38759	13.4339	11.2247
bcat1	0.492765	1.227	0.329073	0.33368	0.216675	0.2513
bcat2	125.015	125.115	103.082	110.829	129.391	126.404
bccip	71.451	54.6781	70.874	79.1775	46.6935	52.4798
bcdin3d	2.90732	3.14418	3.4964	7.00728	5.05576	6.2825
bckdha	73.1756	86.7717	73.9179	82.6096	84.72	91.3056
bckdhb	29.3688	20.1304	22.0067	26.1224	19.1758	24.7112
bckdhbl	73.5699	78.4512	88.4383	71.5982	47.9936	50.0506
bckdk	294.624	290.3	280.37	334.157	398.899	381.683
bcl10	5.02621	5.13805	4.93609	2.76478	5.27243	3.97892
bcl11aa	0.739148	1.45706	1.6865	0.715029	0.650026	0.712016
bcl11ab	0	0.0766873	0	0.143006	0.397238	0.12565
bcl11ba	0.295659	0.0766873	0.246804	0.286011	0.938926	0.167533
bcl2a	0.246383	0.42178	0.493609	0.429017	1.04726	0.586366
bcl2b	0	0	0	0	0.0361125	0
bcl2l10	295.462	305.254	333.186	236.293	160.087	192.873
bcl2l11	0.689871	0.996935	1.60423	2.47877	2.41954	2.09417
BCL2L12	8.86977	9.89267	8.10341	6.14925	5.09187	6.99451
bcl2l1	61.5464	59.4327	56.0657	48.1453	47.7408	44.6895
bcl2l13	15.867	15.4525	17.6054	13.7762	15.0228	11.2247
BCL2L14	23.16	14.6473	17.1118	9.81973	7.15028	10.4289
bcl2l16	0	0	0.164536	0.238343	0.0361125	0.12565
bcl3	3.64646	2.56903	2.96165	3.43214	2.23898	3.89515
bcl6a	3.25225	2.60737	2.75598	2.86011	2.67233	2.30358
bcl6ab	7.24365	14.3405	10.5303	8.05599	8.81146	7.91595
BCL6B	0	0.0766873	0.164536	0.143006	0.252788	0.12565
bcl7a	127.971	163.421	142.9	157.974	151.059	165.69
bcl7ba	11.9742	11.3881	10.5715	11.0591	10.3643	11.1828
bcl7bb	10.0031	8.35892	8.22681	11.2975	10.4726	9.42375
bcl9	65.2421	76.1889	65.7734	68.4997	93.3509	80.039
bcl9l	33.853	40.2992	38.3781	45.9525	45.3212	39.0771
bco1	7.39148	5.13805	10.4892	2.90778	1.04726	2.05228
bco1l	0.0492765	0.0383437	0	0	0.0361125	0
bco2a	0.542042	0.958592	1.06949	0.476686	0.397238	0.5026
bco2b	0	0	0.123402	0.0476686	0.108338	0.12565
bco2l	12.6641	14.2255	11.7232	6.72127	5.27243	3.35067
bcor	55.8796	62.0784	51.7878	64.2096	83.2394	74.9711
BCORL1	13.2061	13.9571	12.0934	14.0146	19.3924	16.4601
BCR_(1_of_2)	16.8526	22.086	18.1401	15.4446	17.1896	15.0361
bcr	4.04068	2.7224	3.57866	3.19379	4.51407	3.5182
bcs1l	6.65233	7.82211	9.87218	8.43734	7.36696	9.17245
bdh1	2.26672	1.68712	2.46804	5.57722	3.86404	6.24061
bdh2	3.00587	2.95246	3.7432	3.43214	2.34732	2.55488
bdkrb1	0.0985531	0	0	0	0.108338	0.0837666
BDKRB2_(1_of_2)	0	0	0	0	0	0
BDKRB2_(2_of_2)	0	0	0	0.0476686	0	0.0418833
bdnf	0.788424	0.613499	1.02835	2.19275	1.48061	2.13605
BDP1_(1_of_2)	17.4932	21.3574	16.9061	20.5452	26.4344	24.1248
BDP1_(2_of_2)	5.96246	6.86352	5.71764	2.38343	3.68348	2.72242
bean1	0	0	0.0411341	0.0953372	0	0
becn1	5.17404	2.49234	4.27794	5.14821	3.71959	4.64905
BEGAIN	0.788424	0.958592	1.15175	0.810366	1.4445	0.795783
BEND2	11.2843	11.3497	14.4381	11.9648	11.7727	12.8163
bend3	8.22918	9.96935	10.6126	9.77206	11.1588	10.9315
bend5	8.91905	10.0077	8.47362	7.96065	11.881	12.0624
BEND7	0.14783	0.191718	0.452475	0.190674	0.180563	0.335067
best1	0	0	0.0411341	0.0953372	0.14445	0
best2	0	0	0.0411341	0.0476686	0.14445	0.12565
best4	0.394212	0.383437	0.287939	0.858034	1.04726	0.87955
bet1	13.551	10.3528	12.4225	10.2487	9.13647	9.42375
bet1l	6.40595	4.40952	5.84104	6.6736	3.64737	4.81658
bfb	0.739148	0.651842	3.00279	0.524354	0.325013	0.209417
BFSP1	0	0.0766873	0	0	0.14445	0
bfsp2	0	0.0383437	0.123402	0.143006	0.0361125	0
bglap	0	0	0	0	0	0
bglapl	0	0	0	0	0	0
bgna	0	0.0766873	0.411341	0	0.108338	0.167533
bgnb	2.21744	0.690186	1.43969	0.476686	0.577801	0.586366
bhlha15	11.1365	13.727	12.7516	0.0476686	0.0722251	0.209417
bhlha9	0	0	0	0.0476686	0.0361125	0.0418833
bhlhe22	0.0492765	0.0766873	0.123402	0.190674	0.0361125	0.2513
bhlhe23	0.0492765	0	0	0	0.14445	0.0418833
bhlhe40	2.5131	3.22087	2.79712	2.33576	1.58895	1.34027
bhlhe41	26.5108	31.7102	32.4136	15.4446	12.8922	10.3033
BHMG1	0.246383	0.0383437	0.20567	0.286011	0.216675	0.209417
bhmt	790.051	701.919	787.059	704.399	397.346	405.012
bicc1a	2.06961	1.07362	1.6865	2.52643	3.28624	3.18313
bicc1b	0.246383	0.115031	0.164536	0.143006	0.108338	0.0418833
bicc2	4.13923	2.83743	3.8666	0.190674	0.14445	0
BICD1_(2_of_2)	0	0	0	0.0476686	0	0.12565
bicd1a	0.0985531	0.230062	0.246804	0.286011	0.14445	0.12565
BICD2_(2_of_2)	51.494	39.379	41.0518	35.4178	44.274	33.8836
bicd2	28.1369	41.8329	39.0774	28.9348	32.9708	29.5696
bida	18.5773	10.6979	16.3302	20.2591	14.445	11.3085
bik	7.63786	7.47702	8.18568	10.8208	6.82527	7.07828
bin1a	0.985531	1.87884	2.18011	5.29121	4.73074	7.0364
bin1b	2.21744	1.07362	2.38578	0.905703	1.08338	1.63345
bin2a	0.739148	0.498468	0.658145	0.33368	0.325013	0.62825
bin2b	1.52757	1.95553	1.48083	1.95441	2.05841	2.13605
bin3	26.3137	31.9403	33.8122	33.0343	42.1794	40.8781
birc2	36.9081	44.2103	35.6632	52.3401	57.7801	58.5529
birc5a	42.9199	25.8053	40.2703	47.0966	20.0786	26.9729
birc5b	0.886977	0.460124	0.658145	0.619692	0.14445	0.418833
birc6	136.841	162.27	133.439	146.772	188.002	148.56
birc7	2.75949	3.18252	4.85382	2.66944	2.41954	1.42403
bivm	2.02034	1.41872	1.72763	1.76374	2.23898	1.84287
blcap	109.049	81.9021	112.09	103.012	63.4136	71.8718
blf	78.5468	156.596	96.7473	63.3039	70.6722	82.217
blk	0	0.0766873	0.0411341	0.0476686	0.0361125	0.0418833
blm	62.0884	75.2303	73.9591	59.4904	91.8342	76.5208
blmh	55.5346	50.0001	54.1324	59.252	42.8656	52.8149
blnk	0.14783	0.268406	0.20567	0	0.0361125	0
bloc1s1	4.43489	3.22087	5.10063	5.19588	1.76951	3.47632
bloc1s2	3.25225	3.25921	3.12619	5.19588	3.4668	4.56528
bloc1s3	8.47556	8.35892	8.55589	9.00936	4.91131	5.19353
bloc1s4	8.62339	6.6718	7.85661	7.62697	6.96972	6.70133
bloc1s6	9.85531	8.62733	12.7104	10.0581	7.36696	7.41335
blvra	6.99727	4.90799	6.12898	9.34304	7.7642	9.96823
blvrb	17.2961	8.5123	19.333	8.342	6.39192	9.21433
blzf1	172.517	190.415	192.549	180.569	215.303	212.516
bmb	27.6934	17.7915	14.8905	16.3027	20.0063	18.303
bmf1	5.91318	8.35892	7.2396	9.00936	7.4753	6.7851
bmf2	0.0492765	0.0766873	0.0822681	0.190674	0.180563	0.0418833
bmi1a	17.8874	29.3713	21.5543	6.62593	7.07806	6.65945
bmi1b	2.46383	2.64571	2.50918	5.29121	4.62241	4.7747
bmp10	0	0	0	0	0	0
BMP10_(1_of_2)	0	0	0	0	0	0
bmp15	1.6754	0.805217	1.06949	0.858034	1.08338	2.09417
bmp16	6.25812	6.97855	7.73321	7.10262	6.46414	6.65945
bmp1a	48.6359	52.7226	55.531	56.2966	83.4922	72.7932
bmp1b	2.61166	2.26228	2.96165	3.14613	2.09453	2.05228
bmp2a	0.246383	0.881904	1.15175	1.6684	1.08338	0.0418833
bmp2b	106.437	112.615	107.401	180.092	173.051	201.207
bmp2k	58.2941	79.4481	59.3976	56.8686	85.7673	63.3276
bmp3	3.3508	4.75462	4.15454	2.5741	2.92512	1.88475
bmp4	54.4013	63.0753	49.4843	73.0283	75.1502	85.5257
bmp5	0	0	0	0	0	0
bmp6	0.739148	0.690186	0.452475	0.190674	0.613913	0.544483
bmp7a	99.5386	108.781	75.2342	220.134	209.344	233.081
bmp7b	0.246383	0.306749	0.946084	1.04871	1.11949	0.921433
bmp8a	0.640595	0.766873	1.19289	1.23938	1.22783	1.04708
bmper	58.9347	60.2763	60.0146	44.9038	49.0769	40.4593
bmpr1aa	127.281	157.477	128.996	88.4729	120.869	89.5884
bmpr1ab	46.9605	44.402	38.7483	58.5847	65.472	57.9665
bmpr1ba	14.5366	18.4433	18.1813	41.2333	29.215	41.3807
bmpr1bb	9.0176	6.51842	9.13176	18.8291	18.7424	18.9731
bmpr2a	6.5045	5.82824	6.70485	5.38655	4.87519	6.36626
bmpr2b	4.92765	5.06136	5.38856	12.0125	7.1864	7.95783
bms1	291.224	358.973	308.464	294.496	369.648	349.474
BNC1	0	0	0	0	0	0
bnc2	0.542042	0.191718	0.0822681	0.0953372	0.0361125	0.0418833
bnip1a	0.837701	0.958592	0.617011	0.905703	0.902814	1.0052
bnip1b	6.06101	5.52149	5.3063	6.48293	6.75305	8.25101
bnip2	40.2589	41.7946	45.7	46.0955	55.3605	54.8671
bnip3	0.739148	1.18865	1.27516	1.04871	0.902814	1.13085
bnip3la	16.3598	14.6856	14.0679	22.7379	25.1704	24.2504
bnip3lb	12.9105	9.58592	10.119	4.48085	6.78916	5.7799
bnip4	7.93352	13.8421	5.3063	29.7452	23.5815	26.3446
bnipl	8.62339	7.43867	8.35022	7.34096	11.8449	11.3923
boc	81.4541	98.6199	78.4838	103.012	120.11	110.865
bod1	25.2296	17.0246	28.547	35.0841	20.0063	25.5488
bod1l1	105.058	133.589	113.695	106.778	185.943	157.188
boka	8.72195	9.93101	10.2835	10.4871	11.8088	11.0572
bokb	3.00587	1.53375	3.33186	2.81245	2.23898	2.80618
bola1	13.8467	10.4678	14.4792	15.1109	8.45033	9.42375
BOLA2B	2.26672	1.38037	3.12619	3.38447	1.40839	1.7591
bola3	6.01174	3.71934	7.03393	7.72231	3.86404	6.19873
bop1	101.608	105.407	90.0014	94.7651	115.741	100.897
bora	64.0102	70.5524	58.6161	60.8251	66.5915	69.3169
BORCS6	25.9195	30.3298	28.9584	33.511	45.0685	43.8518
BORCS7	1.57685	1.53375	2.26237	3.14613	1.48061	2.13605
bpgm	0.443489	0.881904	1.06949	0.476686	0.686138	0.837666
bphl	0	0	0	0	0	0
bpifcl	3.49863	5.13805	4.93609	5.7679	8.37811	7.37146
bpnt1	3.9914	1.34203	0.534743	1.28705	1.26394	1.29838
bptf	116.785	125.154	106.332	118.695	167.49	141.482
braf	13.1076	17.8298	17.5231	19.9255	25.6038	23.2452
brap	13.3047	13.3053	13.1629	15.5876	16.9729	17.2978
brat1	3.49863	4.63958	4.11341	9.29537	11.0866	10.5127
brca2	62.729	66.5646	60.9607	64.5433	87.1034	82.5939
brcc3	14.1424	17.5997	17.2763	16.6363	21.5592	19.0569
brd1a	40.4068	56.0968	50.1836	61.7785	85.3339	78.615
brd1b	175.868	202.723	170.748	177.041	240.185	224.118
brd2a	250.226	290.568	231.503	250.403	315.046	292.262
brd2b	7.3422	10.5062	9.66651	10.5824	17.2618	13.4445
brd3a	371.841	450.998	373.497	394.028	512.329	474.454
brd3b	113.09	150.077	122.209	135.76	190.963	167.282
brd4	24.8354	27.4541	25.2975	31.3659	33.1152	29.8628
brd7	138.566	158.474	147.589	180.759	200.136	215.615
BRD8_(2_of_2)	0.246383	0.460124	0.370207	0.572023	0.505576	0.7539
brd8	106.733	123.505	119.124	109.828	163.084	151.618
brd9	47.2562	49.8084	52.0757	53.1028	63.2692	60.0607
brdt	13.2554	14.5706	12.9572	18.5907	21.0897	17.2978
bre	6.80016	5.71321	6.99279	5.81557	3.39458	4.18833
brf1a	5.6668	6.44174	5.22403	5.19588	4.87519	5.61236
brf1b	7.58859	10.2761	11.8055	8.00832	11.5199	11.4341
brf2	4.77982	4.06443	4.81269	6.43526	5.88634	6.5338
BRF2_(2_of_2)	0	0	0	0	0	0
bri3	83.6223	93.7503	93.0041	71.8842	90.2452	79.7877
bri3bp	10.693	12.1933	9.37857	13.8716	14.6617	13.7377
bricd5	0.0985531	0.0766873	0.287939	0	0.0722251	0.0837666
BRINP1	0.197106	0.153375	0.123402	0.143006	0.0722251	0.209417
brinp2	1.37974	0.230062	1.27516	0.619692	1.04726	1.5078
BRINP3	2.61166	2.03221	0.699279	1.04871	1.08338	0.712016
brinp3a	1.28119	2.56903	1.15175	0.33368	0.43335	0.293183
brip1	21.8295	24.885	22.5415	22.4996	29.7928	25.842
brk1	74.851	54.6781	89.59	77.3661	40.7711	52.8986
brms1	2.316	1.95553	3.41413	3.14613	3.06957	3.89515
brms1la	58.2941	71.4726	70.0925	67.3557	68.1083	71.6205
brms1lb	23.0121	22.5844	22.8294	19.8301	25.351	27.9781
brox	6.89871	6.86352	6.62259	9.77206	13.1089	12.188
BRPF1	102.397	131.442	93.0453	95.4802	157.09	131.891
brpf3a	14.9801	17.408	14.5615	16.4933	21.0897	18.68
brpf3b	62.0884	73.6582	51.7878	53.7702	70.4556	60.2282
BRSK1_(1_of_2)	0	0	0	0	0.0722251	0.0418833
BRSK1_(2_of_2)	2.16817	1.57209	1.97444	3.00312	4.62241	3.85327
brwd1	136.496	156.481	143.517	147.248	199.666	172.601
brwd3	231.748	231.097	214.679	248.496	353.903	302.146
bscl2	6.15957	8.66567	9.21403	7.00728	7.40307	6.5338
bscl2l	0	0	0	0	0	0
bsdc1	40.0125	44.4403	42.4092	39.6603	38.6765	38.7421
bsg	519.818	472.279	511.297	447.799	356.72	375.526
bsk146	0.689871	1.15031	1.31629	0.572023	1.58895	1.0052
bsnb	0.14783	0.268406	0.164536	0.0476686	0.2889	0.0418833
bsnd	0	0	0	0	0	0.0418833
bspry	4.13923	5.25308	5.59423	8.72335	9.28092	8.75361
bsx	0	0	0.164536	0.0953372	0.14445	0.0837666
btaf1	86.1354	96.8945	90.3716	102.058	142.175	128.959
btbd10a	101.066	128.298	105.756	107.016	135.133	129.168
btbd10b	55.2883	67.7533	59.3565	63.3515	66.8082	62.5318
btbd11a	6.20884	3.64265	4.85382	0.572023	1.33616	1.54968
btbd11b	2.41455	2.53068	2.50918	2.95545	1.95008	1.7591
btbd16	0.0492765	0.0766873	0.370207	0.238343	0.0361125	0.209417
btbd17a	0.0492765	0.575155	0.164536	0.190674	0.325013	0.209417
btbd17b	0.640595	1.53375	1.15175	1.85907	3.97238	2.21982
BTBD2_(2_of_2)	20.6469	17.1396	15.1373	13.5379	19.0674	20.2296
btbd2a	13.0583	12.9985	13.6565	16.398	16.4673	17.591
btbd3a	31.2413	30.6366	30.1924	29.4592	36.7265	33.1297
btbd3b	0.788424	0.0383437	0.246804	0	0	0.0418833
btbd6a	1.97106	1.99387	4.56588	1.71607	1.33616	0.7539
btbd6b	17.9367	17.6764	17.8111	18.4477	13.3255	17.214
btbd7	33.5573	41.4495	32.2902	36.5141	57.3106	45.1502
btbd9	16.0149	17.0629	15.96	17.9711	20.8008	19.4339
btc	0.492765	0.613499	0.658145	0.905703	0.650026	0.2513
btd	4.92765	5.63652	7.69207	5.67256	3.28624	3.39255
btf3	795.717	526.267	820.213	822.521	375.968	450.036
btf3l4	108.605	62.3085	88.8907	103.25	51.6409	64.4584
btg1	89.634	100.077	76.4682	116.645	157.487	133.566
btg2	111.266	108.244	103.905	109.733	110.793	100.059
btg3	34.6907	27.4541	36.9795	42.0437	30.0456	37.9882
btg4	2.26672	1.57209	1.60423	2.09742	0.938926	2.0104
btk	0.197106	0.958592	0.575877	0.143006	0.650026	0.837666
BTN3A1	0.246383	0.115031	0.0822681	0.190674	0.0722251	0.0837666
btr01	19.1193	22.9295	22.2947	20.6405	26.0733	23.2034
btr02	9.80603	10.4678	8.06228	10.2011	9.64205	9.46563
btr04	14.3395	12.27	19.95	19.1628	19.6813	20.8579
btr05	0	0.115031	0	0	0	0
btr06	0	0.0383437	0.0822681	0	0.325013	0.209417
btr07	0.689871	1.03528	1.85103	2.04975	2.81678	2.72242
btr09	0.197106	0.191718	0.0822681	0.429017	0.216675	0
btr12	39.3227	48.5814	39.8589	29.8405	41.71	34.5537
btr16	0.295659	0.460124	0.411341	0.33368	0.505576	0.460717
btr18	6.15957	15.5675	15.4253	10.0581	12.4227	8.58608
btr19	0.246383	0.613499	0.0822681	0.572023	0.252788	0.209417
btr20	0.739148	0.651842	1.52196	0.572023	1.30005	0.460717
btr21	0.492765	0.805217	0.863816	0.381349	0.397238	0.5026
btr22	0.197106	0.268406	0.20567	0.429017	0.577801	0.335067
btr23	0.542042	0.575155	0.617011	2.47877	3.21402	2.42923
btr24	0.640595	1.68712	1.27516	1.43006	0.469463	0.670133
btr25	0.14783	0.191718	0.164536	0.33368	0.325013	0.2513
btr26	1.82323	3.48927	2.46804	0.715029	0.686138	0.837666
btr29	0.788424	1.26534	0.781547	0.572023	0.577801	0.460717
btr30	12.2206	15.6442	11.5998	9.1047	16.1784	12.3556
btr31	0.394212	0.306749	0	0.619692	0.541688	0.795783
btr32	0.591318	0.498468	0	0	0	0.0837666
bub1	107.374	173.582	86.2582	79.7019	128.38	97.2112
bub1ba	27.447	30.5599	30.686	34.2737	34.2347	39.6216
bub1bb	94.3645	107.516	90.8652	93.0967	114.224	117.273
bub3	187.004	141.105	154.088	187.29	133.075	158.528
buc	4.77982	3.9494	3.57866	4.33784	6.28358	7.49711
BUD13	54.8941	56.1735	58.3281	74.22	74.8613	75.725
bud31	172.813	79.9082	129.819	138.573	66.5915	86.1959
bves	0	0.0383437	0.246804	0.0953372	0.252788	0.0837666
BX000364.1	0	0	0	0	0	0
BX000477.1	0.0492765	0.0766873	0.329073	0	0.108338	0.0418833
BX000534.1	0.640595	0.345093	0.740413	0.286011	0.613913	0.837666
BX000701.1	0.936254	0.575155	0.575877	1.00104	1.48061	0.87955
BX000701.2	8.47556	10.3528	11.5175	2.47877	2.41954	2.93183
BX000701.3	5.46969	6.36505	6.82826	6.57826	6.50026	7.58088
BX000701.4	8.52484	11.043	11.5175	10.1057	9.60594	12.565
BX000703.1	0.394212	0.498468	0.617011	0.238343	0.325013	0.209417
BX000703.2	0.0985531	0.153375	0.0822681	0.429017	0.325013	0.460717
BX000981.1	0	0	0	0	0	0
BX000981.2	0	0	0	0	0	0
BX000981.3	0	0	0	0	0	0
BX000981.4	0	0	0	0	0	0
BX001041.1	0	0	0	0	0	0.0418833
BX001041.2	0	0	0	0	0	0
BX001050.1	0.295659	0.191718	0.493609	0.0476686	0.0722251	0.167533
BX001051.1	0	0.115031	0.20567	0	0.108338	0.0837666
BX001056.1	0	0.0383437	0	0.0953372	0.216675	0
BX004770.1	0	0	0	0	0	0
BX004785.1	0	0.460124	0.123402	0	0.216675	0.0837666
BX004816.1	0.0492765	0	0	0	0	0
BX004816.2	0	0	0	0	0	0
BX004816.3	0	0.0766873	0	0	0	0
BX004816.4	0	0	0	0	0	0.0418833
BX004828.1	0	0	0	0	0	0
BX004828.2	0.492765	0.920248	0.863816	0.524354	0.794476	0.544483
BX004857.1	0.0492765	0.0383437	0	0.0476686	0	0.0418833
BX004873.2	0.246383	0.958592	0.493609	0.524354	0.505576	0.5026
BX004873.3	0	0.0766873	0	0.0476686	0.0361125	0.0837666
BX004873.4	1.28119	1.53375	1.9333	0.810366	0.469463	1.29838
BX004873.5	1.82323	3.48927	4.07227	0.953372	0.938926	3.22502
BX004876.1	13.6496	14.2638	29.2875	3.24146	5.59744	6.61756
BX004983.1	0.14783	0.0383437	0.164536	0	0	0
BX004993.1	0.0492765	0.230062	0	0.190674	0.14445	0.0837666
BX004993.2	0.14783	0.230062	0.20567	0.0476686	0.0722251	0.167533
BX004993.3	0.0492765	0.115031	0	0.0476686	0.0361125	0.0837666
BX005022.1	1.52757	0.766873	1.11062	1.23938	1.55284	1.59157
BX005027.1	0	0	0	0	0	0
BX005082.1	0.0985531	0.0383437	0	0.0476686	0	0
BX005082.2	0.246383	0	0	0	0.0361125	0.12565
BX005085.1	9.0176	10.2761	10.8183	10.8684	9.93095	11.0991
BX005085.2	9.46109	11.1197	10.1601	12.9659	13.6867	13.1095
BX005085.3	9.80603	10.9663	10.4892	11.3451	11.0866	12.188
BX005085.4	9.26399	7.8988	8.92609	11.3451	8.95591	11.2247
BX005085.5	11.1365	13.5353	11.7643	16.3027	16.1784	20.5647
BX005085.6	4.58272	4.37118	4.03114	3.3368	5.38077	5.40295
BX005105.1	0	0	0	0	0	0
BX005125.1	0	0	0	0	0	0
BX005223.1	0	0	0	0	0	0
BX005223.2	0.0492765	0.0766873	0.164536	0	0	0
BX005268.1	0	0	0	0	0	0
[truncated: 26,871 more rows]
